# Supplementary material for: Access to cyclopentenonesviacopper-catalyzed 5-endotrifluoromethylcarbocyclization of ynones
Source: Royal Society of Chemistry journal article supplement (doi:10.1039/d2qo00843b), 2022-01-01
Supplement: d2qo00843b1.pdf [file d2qo00843b1.pdf]

*Supporting Information to*

**Access to cyclopentenones via copper-catalyzed 5-endo trifluoromethylcarbocyclization of  
ynones**

Siya Le,<sup>§</sup> Yihui Bai,<sup>§</sup> Jiayan Qiu, Zuxiao Zhang, Hanliang Zheng,\* and Gangguo Zhu\*

*Key Laboratory of the Ministry of Education for Advanced Catalysis Materials, Department of  
Chemistry, Zhejiang Normal University, 688 Yingbin Road, Jinhua 321004, P. R. China.*

*\*email: hanliang@zjnu.edu.cn, gangguo@zjnu.cn*

**Contents**

|                                                                       |                |
|-----------------------------------------------------------------------|----------------|
| <b>1. General information.....</b>                                    | <b>S2</b>      |
| <b>2. General procedures for experiments and analytical data.....</b> | <b>S2-S16</b>  |
| <b>3. Mechanistic experiments.....</b>                                | <b>S16-S18</b> |
| <b>4. Computational data.....</b>                                     | <b>S19-S30</b> |
| <b>5. NMR spectra.....</b>                                            | <b>S31-S83</b> |
| <b>6. X-Ray data.....</b>                                             | <b>S84</b>     |

## 1. General information

Unless otherwise noted, materials obtained from commercial suppliers were used directly without further purification. Ynones were prepared according to the method reported in the literature.<sup>1</sup> Melting points reported here were measured by a melting point instrument and were uncorrected. <sup>1</sup>H, <sup>13</sup>C, and <sup>19</sup>F NMR spectra were measured on a 600 MHz or 400 MHz NMR spectrometer. Chemical shifts are given in parts per million on the delta ( $\delta$ ) scale, and the coupling constants are given in hertz. <sup>1</sup>H NMR chemical shifts were determined relative to the internal standard tetramethylsilane (TMS) at 0.00 ppm, <sup>13</sup>C NMR shifts were determined relative to the residual solvent peaks of CDCl<sub>3</sub> at  $\delta$  77.00 ppm, and <sup>19</sup>F NMR chemical shifts were determined relative to outside standard CFC1<sub>3</sub> at  $\delta$  0.00 ppm. High-resolution mass spectrometry (HRMS) analysis were carried out using a TOF MS instrument with an ESI source. Flash column chromatography was carried out on the silica gel (200-300 mesh).

## 2. General procedures for experiments and analytical data

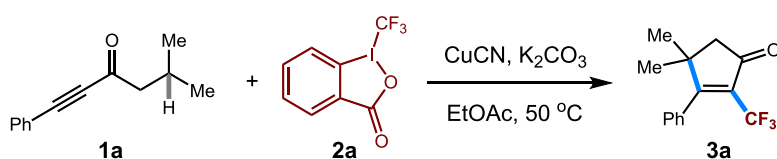

To a mixture of CuCN (1.8 mg, 0.02 mmol), **2a** (94.8 mg, 0.3 mmol) and K<sub>2</sub>CO<sub>3</sub> (55.3 mg, 0.4 mmol) in 2 mL of EtOAc was added **1a** (37.2 mg, 0.2 mmol) under nitrogen atmosphere. After being heated in an oil bath at 50 °C for 10 h, the reaction mixture was quenched with water, extracted with EtOAc, washed with brine, dried over anhydrous Na<sub>2</sub>SO<sub>4</sub>, and concentrated. Column chromatography on silica gel (petroleum ethers/EtOAc = 50:1) gave 40 mg (79% yield) of **3a** as a yellow oil. <sup>1</sup>H NMR (600 MHz, CDCl<sub>3</sub>)  $\delta$  7.47-7.45 (m, 3H), 7.15 (dd,  $J$  = 6.5, 3.0 Hz, 2H), 2.60 (s, 2H), 1.28 (s, 6H). <sup>13</sup>C NMR (151 MHz, CDCl<sub>3</sub>)  $\delta$  200.62, 185.51, 132.45, 129.83 (q,  $J$  = 31.1 Hz), 128.90, 128.07, 126.17 (q,  $J$  = 0.8 Hz), 120.90 (q,  $J$  = 273.4 Hz), 51.01, 43.02, 26.65. <sup>19</sup>F NMR (565 MHz, CDCl<sub>3</sub>)  $\delta$  -60.39. HRMS (ESI)  $m/z$ : [ $M + H$ ]<sup>+</sup> Calcd for C<sub>14</sub>H<sub>13</sub>F<sub>3</sub>O+H<sup>+</sup>: 255.0991; Found 255.0991.

<sup>1</sup> (a) Q.-X. Wang and J. A. May, *Org. Lett.*, 2020, **22**, 9579; (b) T. P. Reddy, J. Gujral, P. Roy and D. B. Ramachary, *Org. Lett.*, 2020, **22**, 9653.

### Scale-up experiments.

To a mixture of CuCN (17.9 mg, 0.2 mmol), **2a** (948 mg, 3.0 mmol) and K<sub>2</sub>CO<sub>3</sub> (553 mg, 4.0 mmol) in 20 mL of EtOAc was added **1a** (372 mg, 2.0 mmol) under nitrogen atmosphere. After being heated in an oil bath at 50 °C for 16 h, the reaction mixture was quenched with water, extracted with EtOAc, washed with brine, dried over anhydrous Na<sub>2</sub>SO<sub>4</sub>, and concentrated. Column chromatography on silica gel (petroleum ethers/EtOAc = 50:1) gave 422 mg (83% yield) of **3a** as a yellow oil.

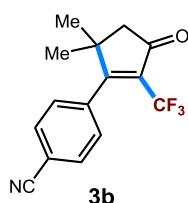

**Compound 3b**: 46 mg, 82% yield, white solid, mp 168-170 °C; Flash column chromatography conditions: petroleum ethers/EtOAc = 50:1; <sup>1</sup>H NMR (600 MHz, CDCl<sub>3</sub>) δ 7.78 (d, *J* = 7.9 Hz, 2H), 7.29 (d, *J* = 7.2 Hz, 2H), 2.63 (s, 2H), 1.28 (s, 6H). <sup>13</sup>C NMR (151 MHz, CDCl<sub>3</sub>) δ 199.52, 182.29, 137.14, 131.95, 130.60 (q, *J* = 31.0 Hz), 127.18, 120.53 (q, *J* = 273.6 Hz), 118.01, 113.19, 50.77, 43.05, 26.56. <sup>19</sup>F NMR (565 MHz, CDCl<sub>3</sub>) δ -60.36. HRMS (ESI) *m/z*: [*M* + H]<sup>+</sup> Calcd for C<sub>15</sub>H<sub>12</sub>F<sub>3</sub>NO+H<sup>+</sup>: 280.0944; Found 280.0942.

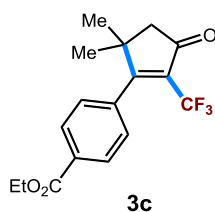

**Compound 3c**: 53 mg, 81% yield, white solid, mp 105-107 °C; Flash column chromatography conditions: petroleum ethers/EtOAc = 20:1; <sup>1</sup>H NMR (600 MHz, CDCl<sub>3</sub>) δ 8.15 (d, *J* = 8.2 Hz, 2H), 7.23 (d, *J* = 8.2 Hz, 2H), 4.43 (q, *J* = 7.1 Hz, 2H), 2.62 (s, 2H), 1.43 (t, *J* = 7.1 Hz, 3H), 1.28 (s, 6H). <sup>13</sup>C NMR (151 MHz, CDCl<sub>3</sub>) δ 199.98, 183.97, 165.85, 136.90, 131.09, 130.20 (q, *J* = 31.3 Hz), 129.27, 126.34, 120.69 (q, *J* = 273.5 Hz), 61.32, 50.90, 43.02, 26.62, 14.32. <sup>19</sup>F NMR (565 MHz, CDCl<sub>3</sub>) δ -60.40. HRMS (ESI) *m/z*: [*M* + H]<sup>+</sup> Calcd for C<sub>17</sub>H<sub>17</sub>F<sub>3</sub>O<sub>3</sub>+H<sup>+</sup>: 327.1203; Found 327.1202.

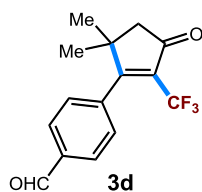

**Compound 3d:** 48 mg, 85% yield, yellow oil; Flash column chromatography conditions: petroleum ethers/EtOAc = 30:1;  $^1\text{H NMR}$  (600 MHz,  $\text{CDCl}_3$ )  $\delta$  10.08 (s, 1H), 7.98 (d,  $J = 8.2$  Hz, 2H), 7.33 (d,  $J = 8.1$  Hz, 2H), 2.62 (s, 2H), 1.28 (s, 6H).  $^{13}\text{C NMR}$  (151 MHz,  $\text{CDCl}_3$ )  $\delta$  199.81, 191.41, 183.32, 138.52, 136.46, 130.34 (q,  $J = 31.2$  Hz), 129.33, 127.07, 120.63 (q,  $J = 273.5$  Hz), 50.86, 43.08, 26.63.  $^{19}\text{F NMR}$  (565 MHz,  $\text{CDCl}_3$ )  $\delta$  -60.38. HRMS (ESI)  $m/z$ :  $[M + \text{H}]^+$  Calcd for  $\text{C}_{15}\text{H}_{13}\text{F}_3\text{O}_2 + \text{H}^+$ : 283.0940; Found 283.0945.

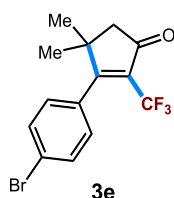

**Compound 3e:** 52 mg, 78% yield, white solid, mp 136-137  $^\circ\text{C}$ ; Flash column chromatography conditions: petroleum ethers/EtOAc = 50:1;  $^1\text{H NMR}$  (600 MHz,  $\text{CDCl}_3$ )  $\delta$  7.61 (d,  $J = 8.4$  Hz, 2H), 7.03 (d,  $J = 8.4$  Hz, 2H), 2.60 (s, 2H), 1.27 (s, 6H).  $^{13}\text{C NMR}$  (151 MHz,  $\text{CDCl}_3$ )  $\delta$  200.09, 183.90, 131.44, 131.24, 130.23 (q,  $J = 31.1$  Hz), 127.86 (q,  $J = 0.9$  Hz), 123.41, 120.74 (q,  $J = 273.5$  Hz), 50.90, 42.94, 26.60.  $^{19}\text{F NMR}$  (565 MHz,  $\text{CDCl}_3$ )  $\delta$  -60.35. HRMS (ESI)  $m/z$ :  $[M + \text{H}]^+$  Calcd for  $\text{C}_{14}\text{H}_{12}\text{BrF}_3\text{O} + \text{H}^+$ : 333.0096; Found 333.0097.

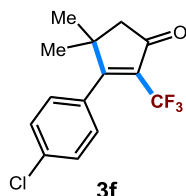

**Compound 3f:** 48 mg, 83% yield, yellow oil; Flash column chromatography conditions: petroleum ethers/EtOAc = 50:1;  $^1\text{H NMR}$  (600 MHz,  $\text{CDCl}_3$ )  $\delta$  7.46 (d,  $J = 8.4$  Hz, 2H), 7.10 (d,  $J = 8.4$  Hz, 2H), 2.60 (s, 2H), 1.27 (s, 6H).  $^{13}\text{C NMR}$  (151 MHz,  $\text{CDCl}_3$ )  $\delta$  200.11, 183.96, 135.28, 130.75, 130.27 (q,  $J = 31.2$  Hz), 128.51, 127.64, 120.75 (q,  $J = 273.6$  Hz), 50.91, 42.99, 26.61.  $^{19}\text{F NMR}$  (565 MHz,  $\text{CDCl}_3$ )  $\delta$  -60.36. HRMS (ESI)  $m/z$ :  $[M + \text{H}]^+$  Calcd for  $\text{C}_{14}\text{H}_{12}\text{ClF}_3\text{O} + \text{H}^+$ : 289.0602;

Found: 289.0601.

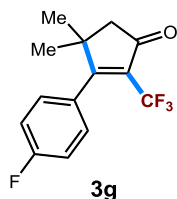

**Compound 3g:** 43 mg, 79% yield, yellow oil; Flash column chromatography conditions: petroleum ethers/EtOAc = 50:1;  $^1\text{H}$  NMR (600 MHz,  $\text{CDCl}_3$ )  $\delta$  7.21-7.11 (m, 4H), 2.60 (s, 2H), 1.27 (s, 6H).  $^{13}\text{C}$  NMR (151 MHz,  $\text{CDCl}_3$ )  $\delta$  200.24, 184.42 (d,  $J = 2.9$  Hz), 163.05 (d,  $J = 249.3$  Hz), 130.28 (q,  $J = 31.0$  Hz), 128.25 (d,  $J = 4.2$  Hz), 128.18 (d,  $J = 1.5$  Hz), 120.81 (q,  $J = 273.5$  Hz), 115.45 (d,  $J = 21.8$  Hz), 50.94, 43.01, 26.62.  $^{19}\text{F}$  NMR (565 MHz,  $\text{CDCl}_3$ )  $\delta$  -60.38, -112.09. HRMS (ESI)  $m/z$ :  $[M + \text{H}]^+$  Calcd for  $\text{C}_{14}\text{H}_{12}\text{F}_4\text{O} + \text{H}^+$ : 273.0897; Found 273.0888.

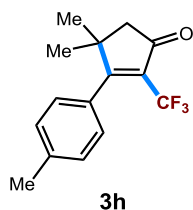

**Compound 3h:** 42 mg, 78% yield, yellow oil; Flash column chromatography conditions: petroleum ethers/EtOAc = 50:1;  $^1\text{H}$  NMR (600 MHz,  $\text{CDCl}_3$ )  $\delta$  7.24 (d,  $J = 7.9$  Hz, 2H), 7.02 (d,  $J = 8.1$  Hz, 2H), 2.56 (s, 2H), 2.41 (s, 3H), 1.25 (s, 6H).  $^{13}\text{C}$  NMR (151 MHz,  $\text{CDCl}_3$ )  $\delta$  200.69, 185.99, 138.93, 129.70 (q,  $J = 30.9$  Hz), 129.50, 128.75, 126.14, 120.96 (q,  $J = 273.5$  Hz), 51.07, 43.03, 26.70, 21.31.  $^{19}\text{F}$  NMR (565 MHz,  $\text{CDCl}_3$ )  $\delta$  -60.35. HRMS (ESI)  $m/z$ :  $[M + \text{H}]^+$  Calcd for  $\text{C}_{15}\text{H}_{15}\text{F}_3\text{O} + \text{H}^+$ : 269.1148; Found 269.1150.

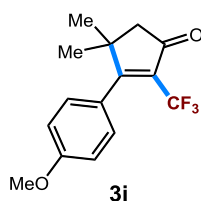

**Compound 3i:** 43 mg, 76% yield, yellow oil; Flash column chromatography conditions: petroleum ethers/EtOAc = 40:1;  $^1\text{H}$  NMR (600 MHz,  $\text{CDCl}_3$ )  $\delta$  7.10 (d,  $J = 8.7$  Hz, 2H), 6.98 (d,  $J = 8.7$  Hz, 2H), 3.87 (s, 3H), 2.58 (s, 2H), 1.27 (s, 6H).  $^{13}\text{C}$  NMR (151 MHz,  $\text{CDCl}_3$ )  $\delta$  200.73, 185.85,

160.16, 129.65 (q,  $J = 30.4$  Hz), 127.80, 124.59, 121.03 (q,  $J = 273.5$  Hz), 113.62, 55.28, 51.17, 43.14, 26.78.  $^{19}\text{F}$  NMR (565 MHz,  $\text{CDCl}_3$ )  $\delta$  -60.28. HRMS (ESI)  $m/z$ :  $[M + \text{H}]^+$  Calcd for  $\text{C}_{15}\text{H}_{15}\text{F}_3\text{O}_2 + \text{H}^+$ : 285.1097; Found 285.1099.

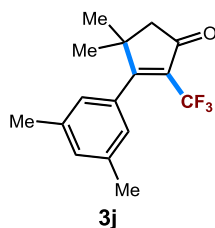

**Compound 3j:** 40 mg, 71% yield, white solid, mp 77-79 °C; Flash column chromatography conditions: petroleum ethers/EtOAc = 40:1;  $^1\text{H}$  NMR (600 MHz,  $\text{CDCl}_3$ )  $\delta$  7.07 (s, 1H), 6.73 (s, 2H), 2.58 (s, 2H), 2.38 (s, 6H), 1.27 (s, 6H).  $^{13}\text{C}$  NMR (151 MHz,  $\text{CDCl}_3$ )  $\delta$  200.85, 186.16, 137.62, 132.41, 130.52, 129.51 (q,  $J = 30.8$  Hz), 123.79, 120.96 (q,  $J = 273.3$  Hz), 51.08, 42.97, 26.77, 21.37.  $^{19}\text{F}$  NMR (565 MHz,  $\text{CDCl}_3$ )  $\delta$  -60.41. HRMS (ESI)  $m/z$ :  $[M + \text{H}]^+$  Calcd for  $\text{C}_{16}\text{H}_{17}\text{F}_3\text{O} + \text{H}^+$ : 283.1304; Found 283.1305.

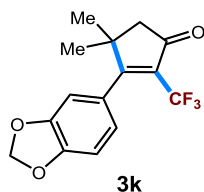

**Compound 3k:** 47 mg, 79% yield, yellow oil; Flash column chromatography conditions: petroleum ethers/EtOAc = 30:1;  $^1\text{H}$  NMR (600 MHz,  $\text{CDCl}_3$ )  $\delta$  6.89 (d,  $J = 7.9$  Hz, 1H), 6.64 (s, 1H), 6.61 (d,  $J = 7.9$  Hz, 1H), 6.06 (s, 2H), 2.57 (s, 2H), 1.28 (s, 6H).  $^{13}\text{C}$  NMR (151 MHz,  $\text{CDCl}_3$ )  $\delta$  200.55, 185.35, 148.28, 147.57, 129.94 (q,  $J = 30.8$  Hz), 125.72, 120.92 (q,  $J = 273.5$  Hz), 120.24 (q,  $J = 1.5$  Hz), 108.24, 107.09 (q,  $J = 1.4$  Hz), 101.50, 51.11, 43.12, 26.83.  $^{19}\text{F}$  NMR (565 MHz,  $\text{CDCl}_3$ )  $\delta$  -60.37. HRMS (ESI)  $m/z$ :  $[M + \text{H}]^+$  Calcd for  $\text{C}_{15}\text{H}_{13}\text{F}_3\text{O}_3 + \text{H}^+$ : 299.0890; Found 299.0888.

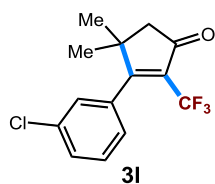

**Compound 3l:** 45 mg, 78% yield, yellow oil; Flash column chromatography conditions: petroleum ethers/EtOAc = 50:1;  $^1\text{H}$  NMR (600 MHz,  $\text{CDCl}_3$ )  $\delta$  7.46-7.39 (m, 2H), 7.18-7.14 (m, 1H), 7.03 (d,  $J = 7.4$  Hz, 1H), 2.60 (s, 2H), 1.28 (s, 6H).  $^{13}\text{C}$  NMR (151 MHz,  $\text{CDCl}_3$ )  $\delta$  200.01, 183.25, 134.32, 134.04, 130.32 (q,  $J = 31.2$  Hz), 129.52, 129.12, 126.15, 124.56, 120.68 (q,  $J = 273.5$  Hz), 50.90, 42.99, 26.63.  $^{19}\text{F}$  NMR (565 MHz,  $\text{CDCl}_3$ )  $\delta$  -60.42. HRMS (ESI)  $m/z$ :  $[M + \text{H}]^+$  Calcd for  $\text{C}_{14}\text{H}_{12}\text{ClF}_3\text{O} + \text{H}^+$ : 289.0602; Found 289.0599.

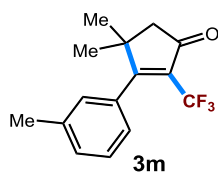

**Compound 3m:** 34 mg, 63% yield, yellow oil; Flash column chromatography conditions: petroleum ethers/EtOAc = 50:1;  $^1\text{H}$  NMR (600 MHz,  $\text{CDCl}_3$ )  $\delta$  7.36-7.32 (m, 1H), 7.26 (d,  $J = 7.7$  Hz, 1H), 6.96-6.91 (m, 2H), 2.59 (s, 2H), 2.42 (s, 3H), 1.28 (s, 6H).  $^{13}\text{C}$  NMR (151 MHz,  $\text{CDCl}_3$ )  $\delta$  200.70, 185.83, 137.78, 132.41, 129.64, 129.45 (q,  $J = 31.0$  Hz), 127.92, 126.60, 123.30, 120.92 (q,  $J = 273.5$  Hz), 51.03, 42.99, 26.71, 21.50.  $^{19}\text{F}$  NMR (565 MHz,  $\text{CDCl}_3$ )  $\delta$  -60.40. HRMS (ESI)  $m/z$ :  $[M + \text{H}]^+$  Calcd for  $\text{C}_{15}\text{H}_{15}\text{F}_3\text{O} + \text{H}^+$ : 269.1148; Found 269.1150.

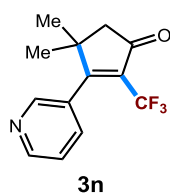

**Compound 3n:** 42 mg, 82% yield, yellow oil; Flash column chromatography conditions: petroleum ethers/EtOAc = 10:1;  $^1\text{H}$  NMR (600 MHz,  $\text{CDCl}_3$ )  $\delta$  8.81-8.69 (m, 1H), 8.54-8.42 (m, 1H), 7.57-7.40 (m, 2H), 2.63 (s, 2H), 1.29 (s, 6H).  $^{13}\text{C}$  NMR (151 MHz,  $\text{CDCl}_3$ )  $\delta$  199.74, 181.05, 150.22, 146.14, 133.93, 131.20 (q,  $J = 31.0$  Hz), 123.13, 120.64 (q,  $J = 273.5$  Hz), 99.98, 50.81, 43.02, 26.41.  $^{19}\text{F}$  NMR (565 MHz,  $\text{CDCl}_3$ )  $\delta$  -60.25. HRMS (ESI)  $m/z$ :  $[M + \text{H}]^+$  Calcd for  $\text{C}_{13}\text{H}_{12}\text{F}_3\text{NO} + \text{H}^+$ : 256.0944; Found 256.0942.

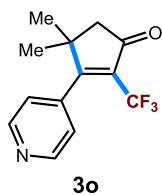

**Compound 3o:** 38 mg, 75% yield, yellow oil; Flash column chromatography conditions: petroleum ethers/EtOAc = 10:1;  $^1\text{H}$  NMR (600 MHz,  $\text{CDCl}_3$ )  $\delta$  8.78-8.68 (m, 2H), 7.08 (d,  $J = 5.5$  Hz, 2H), 2.61 (s, 2H), 1.27 (s, 6H).  $^{13}\text{C}$  NMR (151 MHz,  $\text{CDCl}_3$ )  $\delta$  199.52, 181.09, 149.56, 140.65, 130.37 (q,  $J = 31.5$  Hz), 121.02, 120.49 (q,  $J = 273.6$  Hz), 50.74, 42.81, 26.48.  $^{19}\text{F}$  NMR (565 MHz,  $\text{CDCl}_3$ )  $\delta$  -60.41. HRMS (ESI)  $m/z$ :  $[M + \text{H}]^+$  Calcd for  $\text{C}_{13}\text{H}_{12}\text{F}_3\text{NO} + \text{H}^+$ : 256.0944; Found 256.0943.

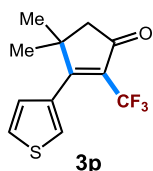

**Compound 3p:** 33 mg, 63% yield, yellow oil; Flash column chromatography conditions: petroleum ethers/EtOAc = 50:1;  $^1\text{H}$  NMR (600 MHz,  $\text{CDCl}_3$ )  $\delta$  7.46-7.43 (m, 1H), 7.30-7.27 (m, 1H), 7.04-7.01 (m, 1H), 2.56 (s, 2H), 1.29 (s, 6H).  $^{13}\text{C}$  NMR (151 MHz,  $\text{CDCl}_3$ )  $\delta$  200.26, 181.41, 131.88, 129.70 (q,  $J = 31.0$  Hz), 126.99 (q,  $J = 1.1$  Hz), 126.16, 124.15 (q,  $J = 1.5$  Hz), 120.98 (q,  $J = 273.4$  Hz), 51.27, 42.93, 26.97.  $^{19}\text{F}$  NMR (565 MHz,  $\text{CDCl}_3$ )  $\delta$  -60.51. HRMS (ESI)  $m/z$ :  $[M + \text{Na}]^+$  Calcd for  $\text{C}_{12}\text{H}_{11}\text{F}_3\text{OS} + \text{Na}^+$ : 283.0375; Found 283.0362.

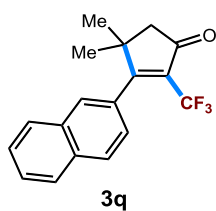

**Compound 3q:** 40 mg, 66% yield, yellow oil; Flash column chromatography conditions: petroleum ethers/EtOAc = 50:1;  $^1\text{H}$  NMR (600 MHz,  $\text{CDCl}_3$ )  $\delta$  7.95-7.89 (m, 3H), 7.64-7.57 (m, 3H), 7.26 (dd,  $J = 8.4, 1.6$  Hz, 1H), 2.65 (s, 2H), 1.34 (s, 6H).  $^{13}\text{C}$  NMR (151 MHz,  $\text{CDCl}_3$ )  $\delta$  200.60, 185.51, 133.03, 132.38, 130.12 (q,  $J = 31.0$  Hz), 129.97, 128.26, 127.88, 127.84, 127.01, 126.91, 125.38 (q,  $J = 0.8$  Hz), 124.04 (q,  $J = 0.8$  Hz), 120.93 (q,  $J = 273.5$  Hz), 51.11, 43.34, 26.82.  $^{19}\text{F}$  NMR (565 MHz,  $\text{CDCl}_3$ )  $\delta$  -60.32. HRMS (ESI)  $m/z$ :  $[M + \text{H}]^+$  Calcd for



$C_{18}H_{15}F_3O+H^+$ : 305.1148; Found 305.1148.

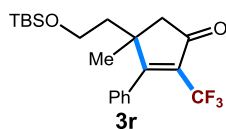

**Compound 3r**: 54 mg, 68% yield, yellow oil; Flash column chromatography conditions: petroleum ethers/EtOAc = 40:1;  $^1H$  NMR (600 MHz,  $CDCl_3$ )  $\delta$  7.46-7.41 (m, 3H), 7.19-7.15 (m, 2H), 3.74-3.68 (m, 2H), 3.00 (d,  $J = 19.0$  Hz, 1H), 2.43 (d,  $J = 19.0$  Hz, 1H), 1.83-1.77 (m, 1H), 1.74-1.70 (m, 1H), 1.25 (s, 3H), 0.88 (s, 9H), 0.03 (s, 3H), 0.03 (s, 3H).  $^{13}C$  NMR (151 MHz,  $CDCl_3$ )  $\delta$  200.82, 184.65, 132.60, 130.61 (q,  $J = 31.0$  Hz), 128.95, 128.05, 126.56, 120.95 (q,  $J = 273.6$  Hz), 59.73, 48.58, 45.48, 39.80, 25.90, 25.34, 18.23, -5.55, -5.56.  $^{19}F$  NMR (565 MHz,  $CDCl_3$ )  $\delta$  -60.12. HRMS (ESI)  $m/z$ :  $[M + NH_4]^+$  Calcd for  $C_{21}H_{29}F_3O_2Si+NH_4^+$ : 416.2227; Found 416.2196.

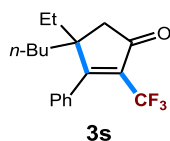

**Compound 3s**: 44 mg, 71% yield, colorless oil; Flash column chromatography conditions: petroleum ethers/EtOAc = 50:1;  $^1H$  NMR (600 MHz,  $CDCl_3$ )  $\delta$  7.49-7.43 (m, 3H), 7.14 (dd,  $J = 6.6, 2.9$  Hz, 2H), 2.52 (s, 2H), 1.64-1.55 (m, 3H), 1.51-1.45 (m, 1H), 1.34-1.28 (m, 3H), 1.26-1.22 (m, 1H), 0.94-0.90 (m, 6H).  $^{13}C$  NMR (151 MHz,  $CDCl_3$ )  $\delta$  200.99, 183.22, 132.71, 131.93 (q,  $J = 30.8$  Hz), 129.11, 128.19, 126.15, 120.84 (q,  $J = 273.5$  Hz), 50.72, 44.74, 36.49, 29.67, 26.51, 23.02, 13.93, 8.70.  $^{19}F$  NMR (565 MHz,  $CDCl_3$ )  $\delta$  -59.71. HRMS (ESI)  $m/z$ :  $[M + H]^+$  Calcd for  $C_{18}H_{21}F_3O+H^+$ : 311.1617; Found 311.1615.

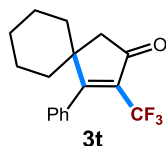

**Compound 3t**: 47 mg, 80% yield, yellow solid, mp 86-88  $^{\circ}C$ ; Flash column chromatography conditions: petroleum ethers/EtOAc = 50:1;  $^1H$  NMR (600 MHz,  $CDCl_3$ )  $\delta$  7.75-7.42 (m, 3H), 7.10 (dd,  $J = 6.5, 2.9$  Hz, 2H), 2.59 (s, 2H), 1.78-1.74 (m, 2H), 1.69-1.66 (m, 1H), 1.57-1.48 (m,

4H), 1.41-1.31 (m, 2H), 1.06-0.98 (m, 1H).  $^{13}\text{C}$  NMR (151 MHz,  $\text{CDCl}_3$ )  $\delta$  200.83, 185.98, 132.63, 130.25 (q,  $J = 31.1$  Hz), 128.70, 127.89, 126.34, 120.94 (q,  $J = 273.5$  Hz), 47.81, 46.48, 33.96, 24.68, 22.97.  $^{19}\text{F}$  NMR (565 MHz,  $\text{CDCl}_3$ )  $\delta$  -60.13. HRMS (ESI)  $m/z$ :  $[M + \text{H}]^+$  Calcd for  $\text{C}_{17}\text{H}_{17}\text{F}_3\text{O} + \text{H}^+$ : 295.1304; Found 295.1305.

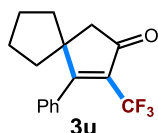

**Compound 3u:** 43 mg, 77% yield, white solid, mp 83-85 °C; Flash column chromatography conditions: petroleum ethers/EtOAc = 50:1;  $^1\text{H}$  NMR (600 MHz,  $\text{CDCl}_3$ )  $\delta$  7.47-7.42 (m, 3H), 7.14-7.10 (m, 2H), 2.51 (s, 2H), 1.82-1.78 (m, 2H), 1.73-1.67 (m, 4H), 1.60-1.57 (m, 2H).  $^{13}\text{C}$  NMR (151 MHz,  $\text{CDCl}_3$ )  $\delta$  200.64, 183.95 (d,  $J = 2.8$  Hz), 132.39, 131.04 (q,  $J = 30.9$  Hz), 128.74, 127.97, 126.59 (d,  $J = 0.8$  Hz), 120.82 (q,  $J = 273.4$  Hz), 54.16, 49.85, 36.99, 23.86.  $^{19}\text{F}$  NMR (565 MHz,  $\text{CDCl}_3$ )  $\delta$  -60.19. HRMS (ESI)  $m/z$ :  $[M + \text{H}]^+$  Calcd for  $\text{C}_{16}\text{H}_{15}\text{F}_3\text{O} + \text{H}^+$ : 281.1148; Found 281.1146.

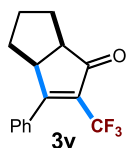

**Compound 3v:** 35 mg, 66% yield, yellow oil; *cis/trans* >20:1. The *cis*-stereochemistry was determined by NOE. Flash column chromatography conditions: petroleum ethers/EtOAc = 50:1;  $^1\text{H}$  NMR (600 MHz,  $\text{CDCl}_3$ )  $\delta$  7.50-7.44 (m, 3H), 7.38-7.35 (m, 2H), 3.77-3.69 (m, 1H), 3.05-3.01 (m, 1H), 2.09-2.04 (m, 1H), 1.88-1.81 (m, 1H), 1.72-1.62 (m, 3H), 1.51-1.46 (m, 1H), 1.35-1.26 (m, 1H).  $^{13}\text{C}$  NMR (151 MHz,  $\text{CDCl}_3$ )  $\delta$  205.10, 180.33, 133.79, 130.46, 130.23 (q,  $J = 31.3$  Hz), 128.50, 127.44 (q,  $J = 1.5$  Hz), 121.12 (q,  $J = 273.2$  Hz), 50.75, 49.30, 29.93, 29.30, 23.97.  $^{19}\text{F}$  NMR (565 MHz,  $\text{CDCl}_3$ )  $\delta$  -59.95. HRMS (ESI)  $m/z$ :  $[M + \text{H}]^+$  Calcd for  $\text{C}_{15}\text{H}_{13}\text{F}_3\text{O} + \text{H}^+$ : 267.0991; Found 267.0989.

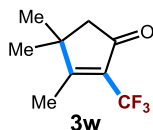

**Compound 3w:** 15 mg, 39% yield, colorless oil; Flash column chromatography conditions: petroleum ethers/EtOAc = 50:1;  $^1\text{H}$  NMR (600 MHz,  $\text{CDCl}_3$ )  $\delta$  2.42 (s, 2H), 2.24-2.21 (m, 3H), 1.28 (s, 6H).  $^{13}\text{C}$  NMR (151 MHz,  $\text{CDCl}_3$ )  $\delta$  200.30, 186.37, 128.67 (q,  $J = 30.9$  Hz), 121.82 (q,  $J = 273.0$  Hz), 50.79, 42.29, 26.32, 12.79.  $^{19}\text{F}$  NMR (565 MHz,  $\text{CDCl}_3$ )  $\delta$  -61.13. HRMS (ESI)  $m/z$ :  $[2M + \text{H}]^+$  Calcd for  $\text{C}_{18}\text{H}_{22}\text{F}_6\text{O}_2 + \text{H}^+$ : 385.1597; Found 385.1592.

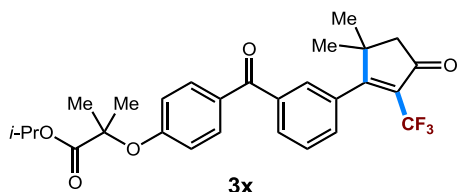

**Compound 3x:** 56 mg, 56% yield, white solid, mp 109-111 °C; Flash column chromatography conditions: petroleum ethers/EtOAc = 10:1;  $^1\text{H}$  NMR (600 MHz,  $\text{CDCl}_3$ )  $\delta$  7.83 (d,  $J = 8.2$  Hz, 2H), 7.79 (d,  $J = 8.8$  Hz, 2H), 7.27-7.23 (m, 2H), 6.91-6.87 (m, 2H), 5.13-5.06 (m, 1H), 2.62 (s, 2H), 1.68 (s, 6H), 1.29 (s, 6H), 1.21 (d,  $J = 6.3$  Hz, 6H).  $^{13}\text{C}$  NMR (151 MHz,  $\text{CDCl}_3$ )  $\delta$  200.07, 194.61, 173.07, 159.92, 138.55, 136.05, 132.09, 130.25 (q,  $J = 31.2$  Hz), 130.01, 129.77, 129.39, 129.37, 126.25, 126.24, 120.75 (q,  $J = 273.5$  Hz), 117.29, 79.48, 69.36, 50.94, 43.10, 26.67, 25.38, 21.54.  $^{19}\text{F}$  NMR (565 MHz,  $\text{CDCl}_3$ )  $\delta$  -60.30. HRMS (ESI)  $m/z$ :  $[M + \text{H} - \text{H}_2\text{O}]^+$  Calcd for  $\text{C}_{28}\text{H}_{29}\text{F}_3\text{O}_5 + \text{H}^+ - \text{H}_2\text{O}$ : 485.1934; Found 485.1955.

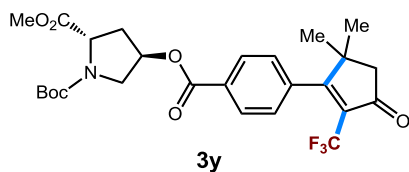

**Compound 3y:** 84 mg, 80% yield, white solid, mp 127-129 °C, as a 1.3:1 mixture of two rotamers; Flash column chromatography conditions: petroleum ethers/EtOAc = 5:1;  $^1\text{H}$  NMR (600 MHz,  $\text{CDCl}_3$ )  $\delta$  8.11 (d,  $J = 8.2$  Hz, 2H), 7.27-7.23 (m, 2H), 5.60-5.56 (m, 1H), 4.55 (t,  $J = 7.9$  Hz, 0.43H, minor rotamer), 4.45 (t,  $J = 8.0$  Hz, 0.57H, major rotamer), 3.87 (d,  $J = 3.1$  Hz, 1H), 3.80 (s, 1.29H, minor rotamer), 3.79 (s, 1.71H, major rotamer), 3.75-3.73 (m, 1H), 2.62 (s, 1 H), 2.60-2.53 (m, 2H), 2.40-2.35 (m, 1H), 1.48 (s, 3.90H, minor rotamer), 1.46 (s, 5.10H, major rotamer), 1.28 (s, 6H).  $^{13}\text{C}$  NMR (151 MHz,  $\text{CDCl}_3$ )  $\delta$  199.87, 183.63, 173.01, 165.11, 153.60, 137.47, 130.29 (q,  $J = 31.5$  Hz), 130.16, 129.44, 120.66 (q,  $J = 273.4$  Hz), 80.73, 72.98, 57.99,

53.37, 52.05, 50.87, 43.02, 36.70, 28.24, 26.60.  $^{19}\text{F}$  NMR (565 MHz,  $\text{CDCl}_3$ )  $\delta$  -60.38. HRMS (ESI)  $m/z$ :  $[\text{M} + \text{Na}]^+$  Calcd for  $\text{C}_{26}\text{H}_{30}\text{F}_3\text{NO}_7 + \text{Na}^+$ : 548.1867; Found 548.1814.

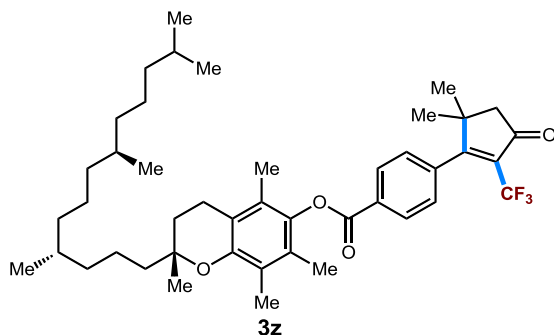

**Compound 3z:** 110 mg, 77% yield, yellow oil; Flash column chromatography conditions: petroleum ethers/EtOAc = 10:1;  $^1\text{H}$  NMR (400 MHz,  $\text{CDCl}_3$ )  $\delta$  8.35 (d,  $J$  = 8.1 Hz, 2H), 7.33 (d,  $J$  = 8.1 Hz, 2H), 2.69-2.63 (m, 4H), 2.16 (s, 3H), 2.11 (s, 3H), 2.07 (s, 3H), 1.61-1.16 (m, 32H), 0.90-0.87 (m, 12H).  $^{13}\text{C}$  NMR (151 MHz,  $\text{CDCl}_3$ )  $\delta$  199.95, 183.81, 164.45, 149.62, 140.50, 137.53, 130.28 (q,  $J$  = 31.5 Hz), 130.21, 126.80, 126.64, 125.07, 123.25, 120.73 (q,  $J$  = 273.5 Hz), 117.58, 77.25, 77.04, 76.83, 75.16, 50.92, 43.12, 39.39, 37.47, 37.31, 32.82, 28.00, 26.65, 24.83, 24.47, 22.74, 22.65, 21.05, 20.67, 19.78, 19.69, 13.15, 12.30, 11.89.  $^{19}\text{F}$  NMR (565 MHz,  $\text{CDCl}_3$ )  $\delta$  -60.28. HRMS (ESI)  $m/z$ :  $[\text{M} + \text{H}]^+$  Calcd for  $\text{C}_{44}\text{H}_{61}\text{F}_3\text{O}_4 + \text{H}^+$ : 711.4595; Found 711.4622.

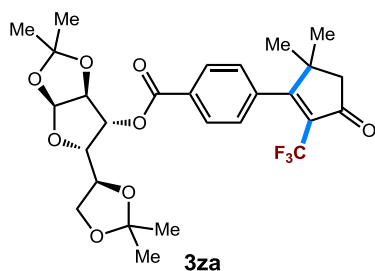

**Compound 3za:** 76 mg, 70% yield, white solid, mp 184-186  $^\circ\text{C}$ ; Flash column chromatography conditions: petroleum ethers/EtOAc = 5:1;  $^1\text{H}$  NMR (600 MHz,  $\text{CDCl}_3$ )  $\delta$  8.11 (d,  $J$  = 8.3 Hz, 2H), 7.24 (d,  $J$  = 8.3 Hz, 2H), 5.96 (d,  $J$  = 3.7 Hz, 1H), 5.52 (d,  $J$  = 2.8 Hz, 1H), 4.65 (d,  $J$  = 3.7 Hz, 1H), 4.40-4.36 (m, 1H), 4.34 (dd,  $J$  = 8.1, 2.8 Hz, 1H), 4.16-4.09 (m, 2H), 2.61 (s, 2H), 1.57 (s, 3H), 1.43 (s, 3H), 1.33 (s, 3H), 1.29 (s, 3H), 1.27 (s, 6H).  $^{13}\text{C}$  NMR (151 MHz,  $\text{CDCl}_3$ )  $\delta$  199.85, 183.50, 164.51, 137.62, 130.32 (q,  $J$  = 31.2 Hz), 130.12, 129.45, 126.60, 120.65 (q,  $J$  = 273.6 Hz), 112.46, 109.52, 105.11, 83.33, 79.85, 72.55, 67.34, 50.85, 43.04, 26.90, 26.72, 26.64, 26.60, 26.21,

25.25.  $^{19}\text{F}$  NMR (565 MHz,  $\text{CDCl}_3$ )  $\delta$  -60.36. HRMS (ESI)  $m/z$ :  $[M + \text{Na}]^+$  Calcd for  $\text{C}_{27}\text{H}_{31}\text{F}_3\text{O}_8 + \text{Na}^+$ : 563.1863; Found 563.1865.

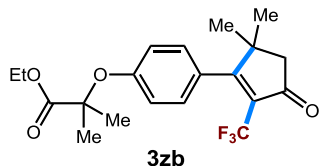

**Compound 3zb**: 62 mg, 81% yield, yellow oil; Flash column chromatography conditions: petroleum ethers/EtOAc = 10:1;  $^1\text{H}$  NMR (600 MHz,  $\text{CDCl}_3$ )  $\delta$  7.02 (d,  $J$  = 8.7 Hz, 2H), 6.88 (d,  $J$  = 8.7 Hz, 2H), 4.23 (q,  $J$  = 7.1 Hz, 2H), 2.55 (s, 2H), 1.64 (s, 6H), 1.24 (s, 6H), 1.21 (t,  $J$  = 7.1 Hz, 3H).  $^{13}\text{C}$  NMR (151 MHz,  $\text{CDCl}_3$ )  $\delta$  200.58, 185.51, 173.91, 156.31, 129.77 (q,  $J$  = 30.7 Hz), 127.44, 125.69, 120.95 (q,  $J$  = 273.4 Hz), 118.02, 79.34, 61.55, 51.13, 43.07, 26.75, 25.44, 13.97.  $^{19}\text{F}$  NMR (565 MHz,  $\text{CDCl}_3$ )  $\delta$  -60.35. HRMS (ESI)  $m/z$ :  $[M + \text{H}]^+$  Calcd for  $\text{C}_{20}\text{H}_{23}\text{F}_3\text{O}_4 + \text{H}^+$ : 385.1621; Found 385.1626.

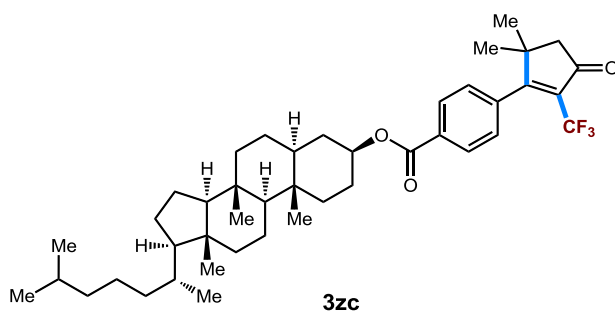

**Compound 3zc**: 88 mg, 65% yield, white solid, mp 65-66  $^\circ\text{C}$ ; Flash column chromatography conditions: petroleum ethers/EtOAc = 10:1;  $^1\text{H}$  NMR (400 MHz,  $\text{CDCl}_3$ )  $\delta$  8.11 (d,  $J$  = 8.2 Hz, 2H), 7.20 (d,  $J$  = 8.2 Hz, 2H), 5.02-4.92 (m, 1H), 2.59 (s, 2H), 2.01-1.00 (m, 38H), 0.92-0.85 (m, 12H), 0.73-0.64 (m, 4H).  $^{13}\text{C}$  NMR (151 MHz,  $\text{CDCl}_3$ )  $\delta$  200.01, 184.06, 165.34, 136.75, 131.52, 130.16 (q,  $J$  = 31.3 Hz), 129.26, 126.28, 120.70 (q,  $J$  = 273.5 Hz), 74.86, 56.43, 56.28, 54.24, 50.89, 44.71, 43.01, 42.61, 39.99, 39.52, 36.79, 36.18, 35.81, 35.53, 35.50, 34.12, 32.01, 28.65, 28.26, 28.02, 27.58, 26.61, 24.22, 23.85, 22.83, 22.57, 21.24, 18.68, 12.30, 12.09.  $^{19}\text{F}$  NMR (377 MHz,  $\text{CDCl}_3$ )  $\delta$  -60.37. HRMS (ESI)  $m/z$ :  $[M + \text{Na}]^+$  Calcd for  $\text{C}_{43}\text{H}_{61}\text{F}_3\text{O}_3 + \text{H}^+$ : 683.4646 Found 683.4660.

### Experimental procedure for the transformation of 3a to 4a

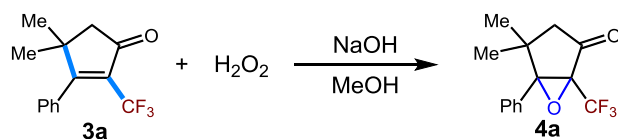

To a solution of **3a** (50.8 mg, 0.2 mmol) and NaOH (8.0 mg, 0.2 mmol) in 2 mL of MeOH was added H<sub>2</sub>O<sub>2</sub> (30 wt%, 226.7 mg, 2 mmol) at 0 °C. After stirring at 25 °C for 10 h, the reaction mixture was quenched with water, extracted with DCM, washed with brine, dried over anhydrous Na<sub>2</sub>SO<sub>4</sub>, and concentrated. Column chromatography on silica gel (petroleum ethers/EtOAc = 50:1) gave 46 mg (85% yield) of **4a** as a white solid, mp 83-85 °C. <sup>1</sup>H NMR (600 MHz, CDCl<sub>3</sub>) δ 7.46-7.33 (m, 5H), 2.56 (d, *J* = 17.3 Hz, 1H), 2.13 (d, *J* = 17.2 Hz, 1H), 1.22 (s, 3H), 1.12 (s, 3H). <sup>13</sup>C NMR (151 MHz, CDCl<sub>3</sub>) δ 202.64, 129.34, 128.85, 128.55, 128.08, 120.72 (q, *J* = 276.9 Hz), 79.11, 64.48 (q, *J* = 38.2 Hz), 47.43, 39.23, 26.20, 21.85. <sup>19</sup>F NMR (565 MHz, CDCl<sub>3</sub>) δ -67.58. HRMS (ESI) *m/z*: [*M* + H]<sup>+</sup> Calcd for C<sub>14</sub>H<sub>13</sub>F<sub>3</sub>O<sub>2</sub>+H<sup>+</sup>: 271.0940; Found 271.0948.

### Experimental procedure for the transformation of 3a to 4b

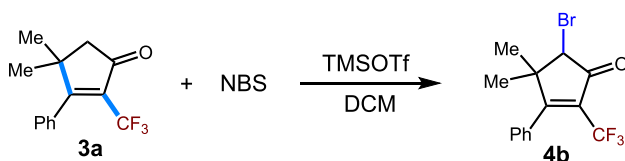

To a solution of **3a** (50.8 mg, 0.2 mmol) in 5 mL of DCM was added NBS (42.7 mg, 0.24 mmol) and TMSOTf (8.9 mg, 0.04 mmol) at 0 °C. After stirring at reflux for 4 h, the reaction mixture was quenched by water, extracted with DCM, washed with saturated aqueous NaHCO<sub>3</sub> and brine, dried over anhydrous Mg<sub>2</sub>SO<sub>4</sub>, and concentrated. Column chromatography on silica gel (petroleum ethers/EtOAc = 50:1) gave 46 mg (69% yield) of **4b** as a white solid, mp 113-115 °C. <sup>1</sup>H NMR (600 MHz, CDCl<sub>3</sub>) δ 7.53-7.46 (m, 3H), 7.18 (dd, *J* = 6.4, 3.1 Hz, 2H), 4.59 (s, 1H), 1.36 (s, 3H), 1.31 (s, 3H). <sup>13</sup>C NMR (151 MHz, CDCl<sub>3</sub>) δ 193.29, 182.56 (q, *J* = 2.9 Hz), 131.72, 131.65, 129.49, 128.26, 127.63 (q, *J* = 32.2 Hz), 126.28, 120.53 (q, *J* = 273.8 Hz), 59.18 (q, *J* = 1.4 Hz), 47.12, 26.06, 24.89. <sup>19</sup>F NMR (565 MHz, CDCl<sub>3</sub>) δ -60.17. HRMS (ESI) *m/z*: [*M* + H]<sup>+</sup> Calcd for C<sub>14</sub>H<sub>12</sub>BrF<sub>3</sub>O+H<sup>+</sup>: 333.0096; Found 333.0097.

### Experimental procedure for the transformation of 3a to 4c

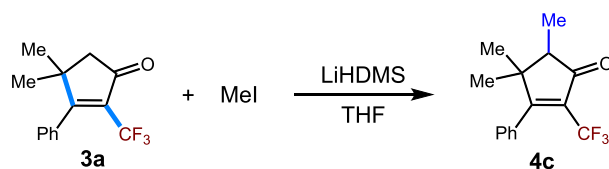

To a solution of **3a** (50.8 mg, 0.2 mmol) in 1 mL of dry THF was added LiHDMS (0.24 mmol, 1.0 M solution in THF) at  $-78\text{ }^{\circ}\text{C}$ . After stirring at  $-78\text{ }^{\circ}\text{C}$  for 1 h, a solution of MeI (0.22 mmol) in 1 mL of THF was added. Upon warming to  $25\text{ }^{\circ}\text{C}$  over 2 h, the reaction mixture was quenched with saturated  $\text{NH}_4\text{Cl}$  solution, extracted with EtOAc, dried over anhydrous  $\text{MgSO}_4$ , and concentrated. Column chromatography on silica gel (petroleum ethers/EtOAc = 50:1) gave 44 mg (82% yield) of **4c** as a colorless oil.  $^1\text{H}$  NMR (600 MHz,  $\text{CDCl}_3$ )  $\delta$  7.48-7.44 (m, 3H), 7.17-7.14 (m, 2H), 2.48 (q,  $J = 7.3$  Hz, 1H), 1.22 (s, 3H), 1.21 (s, 3H), 1.11 (s, 3H).  $^{13}\text{C}$  NMR (151 MHz,  $\text{CDCl}_3$ )  $\delta$  202.81, 183.83, 132.67, 128.80, 128.45 (q,  $J = 28.8$  Hz), 128.00, 126.35, 121.09 (d,  $J = 273.3$  Hz), 53.13, 46.48, 25.49, 23.02, 9.80.  $^{19}\text{F}$  NMR (565 MHz,  $\text{CDCl}_3$ )  $\delta$  -60.13. HRMS (ESI)  $m/z$ :  $[M + \text{H}]^+$  Calcd for  $\text{C}_{15}\text{H}_{15}\text{F}_3\text{O} + \text{H}^+$ : 269.1148; Found 269.1153.

#### Experimental procedure for the transformation of **3a** to **4d**

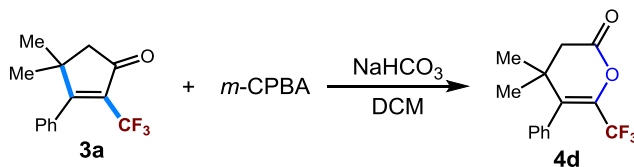

To a mixture of *m*-CPBA (69.0 mg, 0.4 mmol) and  $\text{NaHCO}_3$  (42 mg, 0.5 mmol) in 2 mL of DCM was added **3a** (50.8 mg, 0.2 mmol) at  $0\text{ }^{\circ}\text{C}$ . After stirring at  $25\text{ }^{\circ}\text{C}$  overnight, the reaction mixture was quenched with aqueous  $\text{Na}_2\text{SO}_3$  solution, extracted with DCM, washed with brine, and concentrated. Column chromatography on silica gel (petroleum ethers/EtOAc = 40:1) gave 39 mg (72% yield) of **4d** as a colorless oil.  $^1\text{H}$  NMR (600 MHz,  $\text{CDCl}_3$ )  $\delta$  7.49-7.43 (m, 3H), 7.15 (dd,  $J = 6.5, 3.1$  Hz, 2H), 2.60 (s, 2H), 1.28 (s, 6H).  $^{13}\text{C}$  NMR (151 MHz,  $\text{CDCl}_3$ )  $\delta$  200.58, 185.50, 132.44, 129.81 (q,  $J = 31.1$  Hz), 128.88, 128.05, 126.16, 120.89 (q,  $J = 273.6$  Hz), 51.00, 43.02, 26.65.  $^{19}\text{F}$  NMR (565 MHz,  $\text{CDCl}_3$ )  $\delta$  -60.39. HRMS (ESI)  $m/z$ :  $[M + \text{H}]^+$  Calcd for  $\text{C}_{14}\text{H}_{13}\text{F}_3\text{O}_2 + \text{H}^+$ : 271.0940; Found 271.0948.

#### Experimental procedure for the transformation of **3a** to **4e**

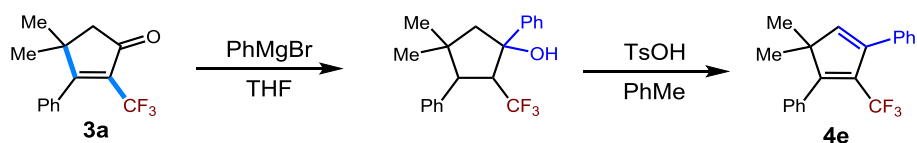

To a solution of **3a** (50.8 mg, 0.2 mmol) in 1 mL of dry THF was added PhMgBr (0.4 mmol, 2.5 M in THF) at 0 °C. After stirring at 0 °C for 2 h, the reaction mixture was quenched with saturated NH<sub>4</sub>Cl solution, extracted with EtOAc, washed with brine, dried over anhydrous MgSO<sub>4</sub> and concentrated to give the crude alcohol. To a solution of the crude alcohol obtained above in 2 mL of PhMe was added TsOH (6.7 mg, 0.04 mmol) at 25 °C. After stirring at reflux for 2 h, the reaction mixture was quenched with saturated K<sub>2</sub>CO<sub>3</sub> solution, extracted with EtOAc, washed with brine, dried over anhydrous Na<sub>2</sub>SO<sub>4</sub> and concentrated. Column chromatography on silica gel using petroleum ethers as the eluent gave 49 mg (78% yield) of **4e** as a colorless oil. <sup>1</sup>H NMR (600 MHz, CDCl<sub>3</sub>) δ 7.44-7.33 (m, 8H), 7.18-7.15 (m, 2H), 6.30 (s, 1H), 1.22 (s, 6H). <sup>13</sup>C NMR (151 MHz, CDCl<sub>3</sub>) δ 161.15 (q, *J* = 4.5 Hz), 145.10, 139.77, 135.80, 134.75, 128.19 (q, *J* = 1.7 Hz), 128.17 (q, *J* = 1.4 Hz), 128.00, 127.98, 127.67, 127.49, 125.96, 122.57 (q, *J* = 272.4 Hz), 54.19, 21.09. <sup>19</sup>F NMR (565 MHz, CDCl<sub>3</sub>) δ -55.69. HRMS (ESI) *m/z*: [*M* + H]<sup>+</sup> Calcd for C<sub>20</sub>H<sub>17</sub>F<sub>3</sub>+H<sup>+</sup>: 315.1355; Found 315.1349.

### 3. Mechanistic experiments

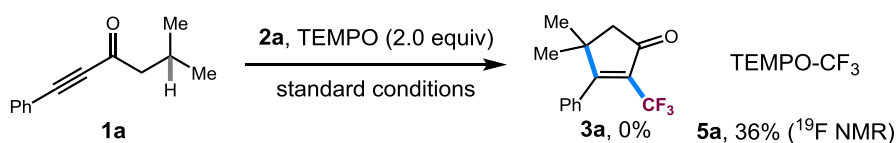

To a mixture of CuCN (1.8 mg, 0.02 mmol), **2a** (94.8 mg, 0.3 mmol), TEMPO (62.5 mg, 0.4 mmol) and K<sub>2</sub>CO<sub>3</sub> (55.3 mg, 0.4 mmol) in 2 mL of EtOAc was added **1a** (37.2 mg, 0.2 mmol) under nitrogen atmosphere. After stirring at 50 °C for 16 h, the reaction mixture was quenched with water, extracted with EtOAc, washed with brine, dried over anhydrous Na<sub>2</sub>SO<sub>4</sub>, and concentrated to give **5a**<sup>2</sup> in 36% <sup>19</sup>F NMR yield using PhCF<sub>3</sub> as the internal standard.

<sup>2</sup> Z. Xiong, F. Zhang, Y. Yu, Z. Tan and G. Zhu, *Org. Lett.*, 2020, **22**, 4088.



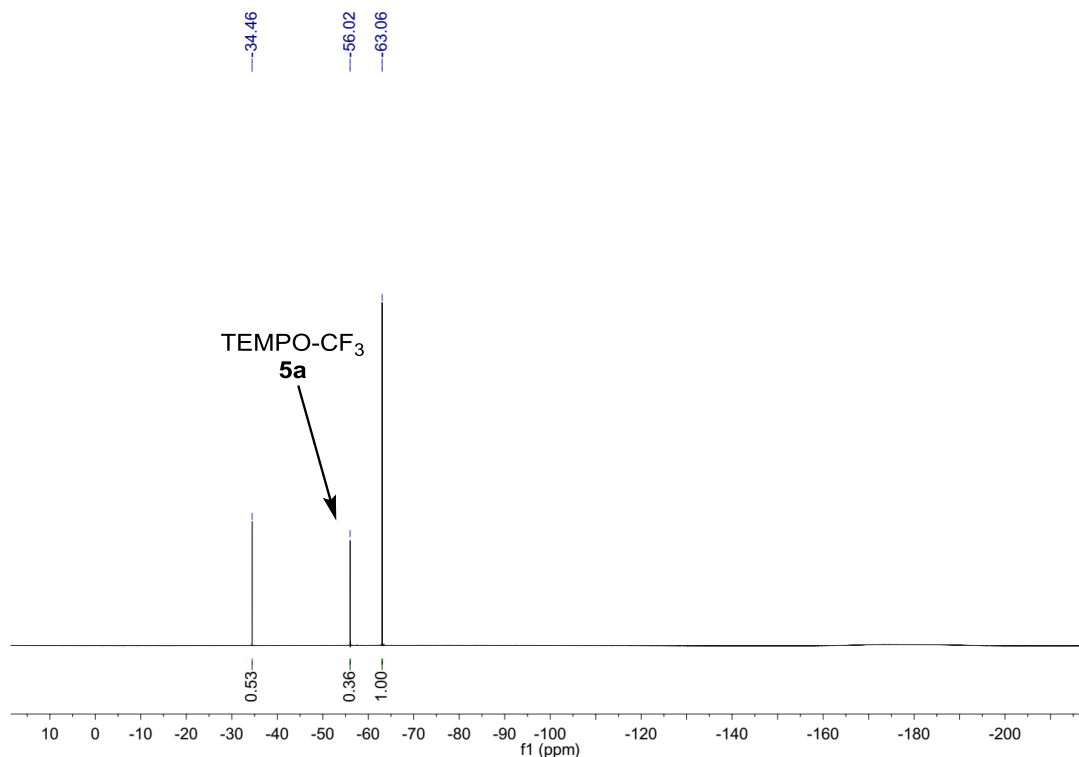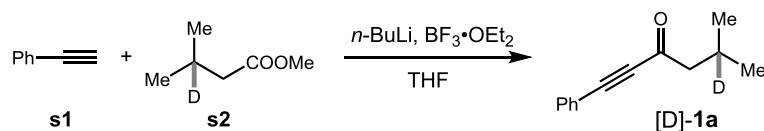

To a solution of phenylacetylene (**s1**, 612 mg, 6.0 mmol) in 15 mL of dry THF was added *n*-BuLi (2.5 M in hexanes, 2.4 mL, 6.0 mmol) at -78 °C under nitrogen atmosphere. After stirring at -78 °C for 1 h, BF<sub>3</sub>·Et<sub>2</sub>O (1.7 g, 12 mmol) and **s2** (585 mg, 5 mmol, 75% D), prepared from methyl 3-methylbut-2-enoate using NaBD<sub>4</sub> and CoSO<sub>4</sub>·7H<sub>2</sub>O using the known method,<sup>3</sup> was added. After stirring at 25 °C for 2 h, the reaction mixture was quenched with saturated aqueous NH<sub>4</sub>Cl solution, extracted with EtOAc, washed with brine, dried over anhydrous Na<sub>2</sub>SO<sub>4</sub>, and concentrated. Column chromatography on silica gel (petroleum ethers/EtOAc = 50:1) gave 486 mg (52% yield) of [D]-**1a** with 75% deuterium incorporation as a colorless oil. <sup>1</sup>H NMR (600 MHz, CDCl<sub>3</sub>) δ 7.58-7.57 (m, 2H), 7.47-7.44 (m, 1H), 7.40-7.37 (m, 2H), 2.55-2.52 (m, 2H), 2.37-2.30 (m, 0.25H), 1.01 (d, *J* = 7.9 Hz, 6H). <sup>13</sup>C NMR (151 MHz, CDCl<sub>3</sub>) δ 188.0, 133.0, 130.7, 128.6, 120.1, 90.5, 88.1, 54.4, 25.0, 24.9, 24.7, 22.4. HRMS (ESI) *m/z*: [*M* + H]<sup>+</sup> Calcd for

<sup>3</sup> F. J. Lundevall, V. Elumalai, A. Drageset, C. Totland and H.-R. Bjørsvik, *Eur. J. Org. Chem.*, 2018, 3416.

C<sub>13</sub>H<sub>13</sub>DO+H<sup>+</sup>: 188.1180; Found 188.1166.

### Determination of the KIE values

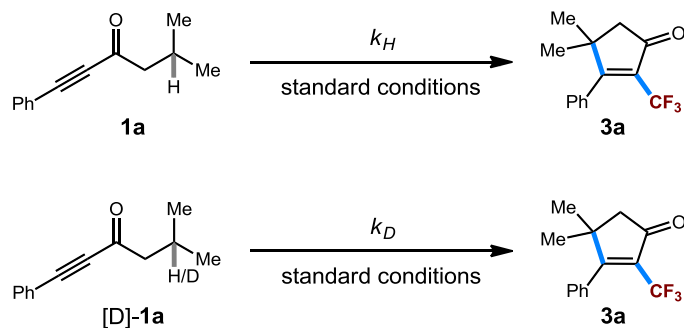

The method to calculate KIE is according to the reported method<sup>4</sup> through parallel reactions of **1a** and **[D]-1a** (75% D) using the general product with *n*-dodecane as the internal standard.

| time (min)   | 20     | 30     | 40     | 50     |
|--------------|--------|--------|--------|--------|
| yield of H   | 0.1766 | 0.2653 | 0.3415 | 0.4065 |
| yield of H+D | 0.1201 | 0.1615 | 0.2102 | 0.2603 |

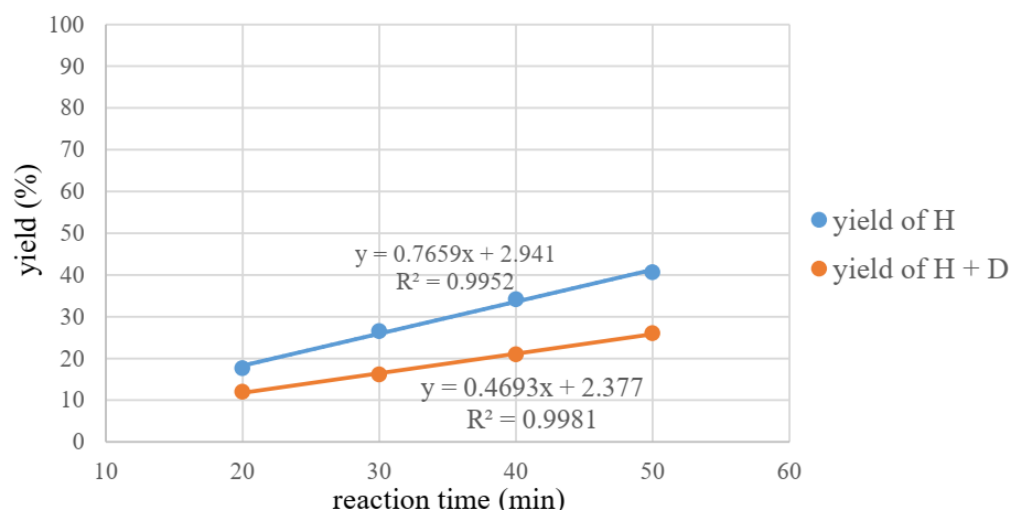

Adjusted initial rates:

$$k_H = 0.7659$$

$$0.4693 = k_H \times 25\% + k_D \times 75\%$$

$$k_D = 0.3704$$

$$\text{KIE} = k_H/k_D = 2.07$$

<sup>4</sup> (a) X.-H. Yang, R. Davison, S.-Z. Nie, F. A. Cruz, T. M. McGinnis and V. M. Dong, *J. Am. Chem. Soc.*, 2019, **141**, 3006; (b) C. Obradors, R. M. Martinez and R. A. Shenvi, *J. Am. Chem. Soc.*, 2016, **138**, 4962.

#### 4. Computational data

**Computational details:** All density functional theory (DFT) calculations were performed using Gaussian 16.<sup>5</sup> Geometry optimizations and frequencies were calculated at the B3LYP-D3(BJ)/6-31G(d)-SDD(Cu,I)-SMD(EtOAc) level of theory.<sup>6</sup> Frequency calculations confirmed that optimized structures are minima (no imaginary frequency) or transition structures (one imaginary frequency). To obtain more accurate electronic energies, single-point energy calculations were performed at the B3LYP-D3(BJ)/6-311+G(d,p)-SDD(Cu,I)-SMD(EtOAc) level of theory with the optimized structures. Structures were generated using CYLview.<sup>7</sup> Grimme's quasi-RRHO correction<sup>8</sup> for the frequencies that are below 100 cm<sup>-1</sup> and concentration correction for all species (from 1 atm to 1 mol/L) are implemented by the GoodVibes program.<sup>9</sup>

The Gibbs free energy profile for the mechanism of Cu-catalyzed trifluoromethylative *endo*-carbocyclization of ynones is shown in Figure S1. The reaction is initiated by electron transfer from Cu(I) to **2a**, producing CF<sub>3</sub> radical and Cu(II) species **Int1**. Coordination of **Int1** with **1a** leads to a stable carbonyl-coordinated Cu(II) complex **Int2**, which is exergonic by 6.1 kcal/mol. Addition of CF<sub>3</sub> radical to **Int2** at the alkynyl carbon atom  $\alpha$  to the carbonyl group proceeds via transition state **TS<sub>2-3a</sub>** to give vinyl radical intermediate **Int3a**, which is highly exergonic by 21.9 kcal/mol. Subsequently, 1,5-HAT occurs to form a more stable tertiary alkyl radical intermediate **Int4a**, through transition state **TS<sub>3a-4a</sub>** that requires a Gibbs free energy barrier of 10.8 kcal/mol. This step is calculated to be the rate-determining step, which is consistent with the observed significant KIE value (2.1). Then, 5-*endo-trig* cyclization of **Int4a** results in the formation of  $\alpha$ -carbonyl radical **Int5a**, with an activation free energy of 5.6 kcal/mol. Combined with K<sub>2</sub>CO<sub>3</sub>, an adduct **Int5b** that lies 24.8 kcal/mol lower in energy than **Int5a** is formed.

---

<sup>5</sup> Frisch, M. J.; Trucks, G. W.; Schlegel, H. B.; Scuseria, G. E.; Robb, M. A.; Cheeseman, J. R.; Scalmani, G.; Barone, V.; Petersson, G. A.; Nakatsuji, H.; Li, X.; Caricato, M.; Marenich, A. V.; Bloino, J.; Janesko, B. G.; Gomperts, R.; Mennucci, B.; Hratchian, H. P.; Ortiz, J. V.; Izmaylov, A. F.; Sonnenberg, J. L.; Williams-Young, D.; Ding, F.; Lipparini, F.; Egidi, F.; Goings, J.; Peng, B.; Petrone, A.; Henderson, T.; Ranasinghe, D.; Zakrzewski, V. G.; Gao, J.; Rega, N.; Zheng, G.; Liang, W.; Hada, M.; Ehara, M.; Toyota, K.; Fukuda, R.; Hasegawa, J.; Ishida, M.; Nakajima, T.; Honda, Y.; Kitao, O.; Nakai, H.; Vreven, T.; Throssell, K.; Montgomery, J. J. A.; Peralta, J. E.; Ogliaro, F.; Bearpark, M. J.; Heyd, J. J.; Brothers, E. N.; Kudin, K. N.; Staroverov, V. N.; Keith, T. A.; Kobayashi, R.; Normand, J.; Raghavachari, K.; Rendell, A. P.; Burant, J. C.; Iyengar, S. S.; Tomasi, J.; Cossi, M.; Millam, J. M.; Klene, M.; Adamo, C.; Cammi, R.; Ochterski, J. W.; Martin, R. L.; Morokuma, K.; Farkas, O.; Foresman, J. B.; Fox, D. J. *Gaussian 16, Revision A.03*, Gaussian, Inc., Wallingford CT, 2016.

<sup>6</sup> (a) C. Lee, W. Yang and R. G. Parr, *Phys. Rev. B: Condens. Matter Mater. Phys.* 1988, **37**, 785; (b) D. Andrae, U. Häußermann, M. Dolg, H. Stoll and H. Preuß, *Theor. Chim. Acta.* 1990, **77**, 123.

<sup>7</sup> C. Y. Legault, CYL view 1.0b; Université de Sherbrooke, Sherbrooke, Canada, 2009; <http://www.cylview.org>.

<sup>8</sup> S. Grimme, *Chem. Eur. J.* 2012, **18**, 9955.

<sup>9</sup> G. Luchini, J. Alegre-Requena, I. Funes, J. Rodríguez-Guerra, J. Chen and R. S. Paton, 2019, GoodVibes: GoodVibes 3.0.0 <http://doi.org/10.5281/zenodo.595246>.

Afterward, proton transfer takes place with an activation free energy of only 3.8 kcal/mol to afford radical anion **Int6**. Electron transfer from this radical anion to Cu(II) via **MECP1** would deliver **3a** as well as regenerate Cu(I). Notably, the SET oxidation of  $\alpha$ -carbonyl radical **Int5a** by Cu(II) followed by deprotonation is also a possible pathway leading to **3a**. However, calculations indicate that the SET oxidation via **MECP2** has an electronic barrier of 15.2 kcal/mol, which is much less favored than the above mentioned pathway.

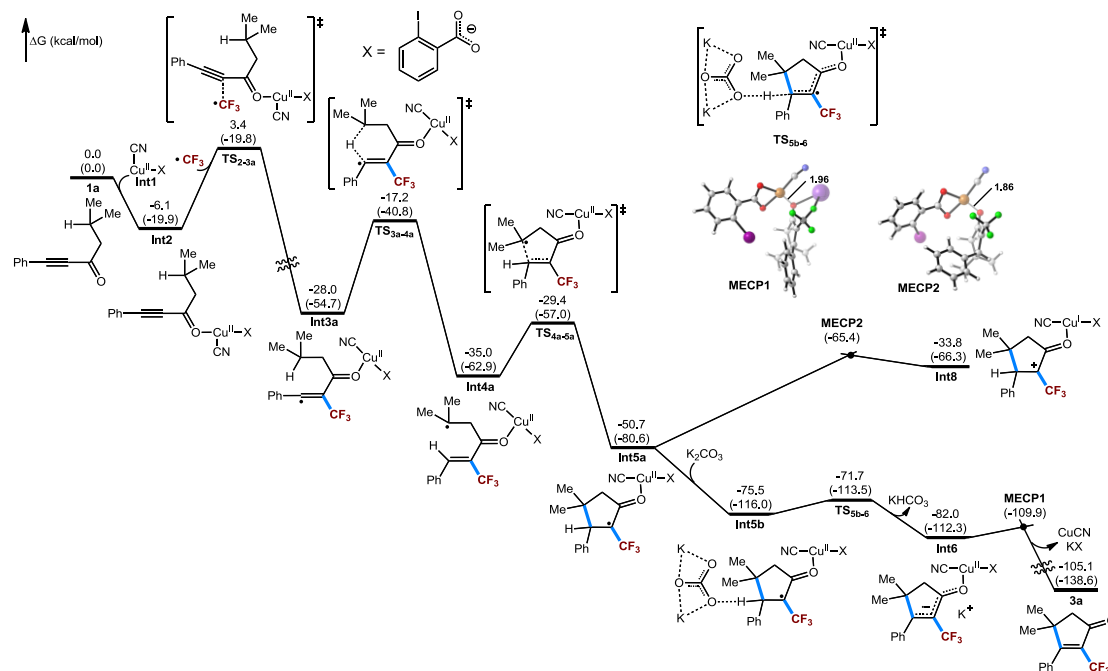

**Figure S1.** The relative free energies ( $\Delta G$ ) and relative electronic energies ( $\Delta E$ , in parentheses) of intermediates and transition-states for the model reaction at the B3LYP-D3(BJ)/6-311+G(d,p)-SDD(Cu,I)-SMD(EtOAc)//B3LYP-D3(BJ)/6-31G(d)-SDD(Cu,I)-SMD(EtOAc) level of theory at 298.15 K. All energies are in kcal/mol.

#### The calculated Cartesian coordinates and energies of structures.

|           |          |          |          |   |          |          |          |
|-----------|----------|----------|----------|---|----------|----------|----------|
| <b>1a</b> |          |          |          | C | -2.30314 | -1.16387 | -0.33238 |
| C         | -0.61385 | 0.60934  | -0.18605 | C | -2.97861 | 1.09878  | 0.26143  |
| C         | 2.90434  | -0.92414 | 0.142    | C | -3.62698 | -1.57964 | -0.23142 |
| C         | 2.9143   | 0.31691  | -0.77617 | H | -1.52031 | -1.86666 | -0.59925 |
| C         | 1.92789  | 1.39046  | -0.36322 | C | -4.2994  | 0.67207  | 0.35872  |
| C         | 0.54387  | 0.97463  | -0.27081 | H | -2.71531 | 2.13448  | 0.45051  |
| H         | 3.9094   | 0.77496  | -0.79325 | C | -4.62575 | -0.66465 | 0.11341  |
| H         | 2.6628   | 0.00758  | -1.80043 | H | -3.8815  | -2.61814 | -0.42143 |
| O         | 2.25698  | 2.54553  | -0.11893 | H | -5.07627 | 1.38201  | 0.62652  |
| C         | -1.96671 | 0.18208  | -0.086   | H | -5.65811 | -0.99335 | 0.19097  |

|   |         |          |          |
|---|---------|----------|----------|
| C | 3.86846 | -1.98369 | -0.39973 |
| H | 3.60758 | -2.27618 | -1.42391 |
| H | 4.89932 | -1.60695 | -0.40995 |
| H | 3.84867 | -2.8848  | 0.22464  |
| C | 3.24847 | -0.54756 | 1.58704  |
| H | 4.24607 | -0.09342 | 1.64484  |
| H | 2.53033 | 0.16894  | 2.0028   |
| H | 3.24498 | -1.43399 | 2.23199  |
| H | 1.88919 | -1.34304 | 0.12643  |

B3LYP-D3(BJ)/6-311+G(d,p)-SDD(Cu,I)-SM  
D(EtOAc): E = -579.210640381 hartree  
Corrected Gibbs Free Energy = -579.01657  
hartree

### 3a

|   |          |          |          |
|---|----------|----------|----------|
| C | -0.11456 | 0.54423  | 0.08445  |
| C | -0.52424 | 2.01552  | -0.08917 |
| C | -2.06587 | 1.96945  | 0.01032  |
| C | -2.44861 | 0.49857  | -0.0276  |
| C | -1.19114 | -0.27329 | 0.11732  |
| H | -2.42018 | 2.38553  | 0.96151  |
| H | -2.56846 | 2.51843  | -0.79133 |
| O | -3.57224 | 0.04482  | -0.15751 |
| C | -1.20876 | -1.76553 | 0.18976  |
| F | -0.07203 | -2.28896 | 0.70036  |
| F | -1.37945 | -2.31874 | -1.03929 |
| F | -2.22232 | -2.21128 | 0.96285  |
| C | 1.30315  | 0.12557  | 0.05083  |
| C | 2.20547  | 0.48133  | 1.06395  |
| C | 1.76312  | -0.63046 | -1.03983 |
| C | 3.54068  | 0.0857   | 0.98581  |
| H | 1.85919  | 1.03942  | 1.92651  |
| C | 3.10143  | -1.00864 | -1.12184 |
| H | 1.06385  | -0.91905 | -1.81867 |
| C | 3.99416  | -0.65164 | -0.10911 |
| H | 4.22622  | 0.35464  | 1.78432  |
| H | 3.44462  | -1.58792 | -1.97424 |
| H | 5.03636  | -0.95169 | -0.17028 |
| C | 0.08734  | 2.94315  | 0.97116  |
| H | -0.31901 | 3.95264  | 0.84254  |
| H | -0.15488 | 2.60754  | 1.98567  |
| H | 1.17475  | 3.00659  | 0.87395  |
| C | -0.07583 | 2.47148  | -1.49338 |
| H | 1.01167  | 2.40649  | -1.59973 |

|   |          |         |          |
|---|----------|---------|----------|
| H | -0.53491 | 1.85447 | -2.27398 |
| H | -0.37523 | 3.5125  | -1.65732 |

B3LYP-D3(BJ)/6-311+G(d,p)-SDD(Cu,I)-SM  
D(EtOAc): E = -916.416875676 hartree  
Corrected Gibbs Free Energy = -916.217277  
hartree

### CF<sub>3</sub>•

|   |          |          |          |
|---|----------|----------|----------|
| C | 0.00004  | 0.00025  | 0.32887  |
| F | 1.0608   | -0.68858 | -0.07307 |
| F | -1.12676 | -0.57438 | -0.07306 |
| F | 0.06593  | 1.2628   | -0.07312 |

B3LYP-D3(BJ)/6-311+G(d,p)-SDD(Cu,I)-SM  
D(EtOAc): E = -337.670228227 hartree  
Corrected Gibbs Free Energy = -337.681950  
hartree

### Int1

|    |          |          |          |
|----|----------|----------|----------|
| Cu | 2.8856   | -0.35776 | -0.01454 |
| C  | 0.75829  | 0.65467  | -0.01797 |
| O  | 0.95854  | -0.614   | -0.02503 |
| O  | 1.81666  | 1.37728  | -0.01707 |
| C  | -0.57768 | 1.27694  | -0.00863 |
| C  | -0.59979 | 2.68665  | -0.00779 |
| C  | -1.80537 | 0.5875   | 0.00234  |
| C  | -1.79504 | 3.39117  | 0.00366  |
| H  | 0.34756  | 3.21349  | -0.01596 |
| C  | -3.00726 | 1.2955   | 0.01431  |
| C  | -3.00185 | 2.69079  | 0.01504  |
| H  | -1.78593 | 4.47626  | 0.00412  |
| H  | -3.94945 | 0.75992  | 0.02312  |
| H  | -3.94726 | 3.22496  | 0.02459  |
| C  | 4.77801  | -0.11485 | 0.02551  |
| N  | 5.93606  | 0.01826  | 0.05175  |
| I  | -2.01127 | -1.55366 | 0.00381  |

B3LYP-D3(BJ)/6-311+G(d,p)-SDD(Cu,I)-SM  
D(EtOAc): E = -721.439621570 hartree  
Corrected Gibbs Free Energy = -721.377300  
hartree

### Int2

|   |          |         |          |
|---|----------|---------|----------|
| C | -1.26498 | 1.25445 | 0.65013  |
| C | -5.11055 | 0.91903 | -0.69535 |
| C | -3.98122 | 0.45333 | -1.65593 |

|    |          |          |          |
|----|----------|----------|----------|
| C  | -2.85053 | -0.1689  | -0.89894 |
| C  | -2.04061 | 0.64542  | -0.06789 |
| H  | -4.36839 | -0.28226 | -2.36779 |
| H  | -3.59787 | 1.32     | -2.20791 |
| O  | -2.64009 | -1.40501 | -0.95654 |
| C  | -0.33408 | 1.93045  | 1.47205  |
| C  | -0.3586  | 3.33661  | 1.57098  |
| C  | 0.64668  | 1.19037  | 2.16623  |
| C  | 0.5912   | 3.98831  | 2.34983  |
| H  | -1.11799 | 3.89598  | 1.03446  |
| C  | 1.59013  | 1.85549  | 2.94035  |
| H  | 0.65797  | 0.109    | 2.08852  |
| C  | 1.56522  | 3.25094  | 3.03139  |
| H  | 0.57483  | 5.07099  | 2.42722  |
| H  | 2.34626  | 1.2866   | 3.47255  |
| H  | 2.30567  | 3.76547  | 3.63682  |
| C  | -6.20365 | 1.62202  | -1.5053  |
| H  | -5.80342 | 2.47701  | -2.06278 |
| H  | -6.66206 | 0.93213  | -2.22489 |
| H  | -6.99504 | 1.98949  | -0.84194 |
| C  | -5.67644 | -0.25446 | 0.1111   |
| H  | -6.07917 | -1.02755 | -0.55561 |
| H  | -4.91975 | -0.72415 | 0.74984  |
| H  | -6.49081 | 0.08682  | 0.76015  |
| Cu | -1.20426 | -2.07492 | 0.33847  |
| C  | 1.14583  | -1.77631 | 0.10024  |
| O  | 0.32575  | -1.62006 | -0.8646  |
| O  | 0.68573  | -2.22531 | 1.20407  |
| C  | 2.59036  | -1.46112 | -0.02653 |
| C  | 3.4813   | -2.30825 | 0.65654  |
| C  | 3.11654  | -0.3867  | -0.76164 |
| C  | 4.85578  | -2.11405 | 0.58502  |
| H  | 3.06978  | -3.12888 | 1.23442  |
| C  | 4.49402  | -0.17649 | -0.82091 |
| C  | 5.36111  | -1.04611 | -0.15718 |
| H  | 5.52685  | -2.78798 | 1.10796  |
| H  | 4.89126  | 0.66443  | -1.3779  |
| H  | 6.43216  | -0.87693 | -0.21839 |
| C  | -2.44294 | -2.51991 | 1.75288  |
| N  | -3.2119  | -2.74214 | 2.60205  |
| H  | -4.67214 | 1.64503  | 0.00214  |
| I  | 1.89227  | 1.08587  | -1.7459  |

B3LYP-D3(BJ)/6-311+G(d,p)-SDD(Cu,I)-SM  
D(EtOAc): E = -1300.68201570 hartree

Corrected Gibbs Free Energy = -1300.403585  
hartree

**Int3a**

|    |          |          |          |
|----|----------|----------|----------|
| C  | -3.20134 | -0.89523 | -0.75795 |
| C  | -4.23468 | 1.73568  | 1.22232  |
| C  | -3.094   | 0.76058  | 1.63415  |
| C  | -1.99291 | 0.74145  | 0.6153   |
| C  | -2.17898 | -0.07216 | -0.61996 |
| H  | -2.66266 | 1.08696  | 2.58491  |
| H  | -3.50433 | -0.2445  | 1.76059  |
| O  | -0.98035 | 1.42662  | 0.81717  |
| C  | -1.18715 | 0.05986  | -1.75603 |
| F  | -1.47492 | -0.77342 | -2.76792 |
| F  | 0.08212  | -0.21478 | -1.36038 |
| F  | -1.17622 | 1.31735  | -2.25296 |
| C  | -4.35726 | -1.56755 | -0.4224  |
| C  | -5.63339 | -1.0447  | -0.79382 |
| C  | -4.29278 | -2.80829 | 0.28205  |
| C  | -6.78524 | -1.7299  | -0.44491 |
| H  | -5.68293 | -0.11017 | -1.34155 |
| C  | -5.46236 | -3.47068 | 0.61577  |
| H  | -3.32353 | -3.21105 | 0.55582  |
| C  | -6.71107 | -2.94058 | 0.2595   |
| H  | -7.75262 | -1.32188 | -0.72183 |
| H  | -5.40727 | -4.40842 | 1.16046  |
| H  | -7.62072 | -3.46923 | 0.52659  |
| C  | -5.41222 | 1.55685  | 2.18477  |
| H  | -5.79002 | 0.52808  | 2.1645   |
| H  | -5.11647 | 1.79208  | 3.21489  |
| H  | -6.23581 | 2.22629  | 1.91086  |
| C  | -3.74997 | 3.18804  | 1.18453  |
| H  | -3.38004 | 3.50166  | 2.16888  |
| H  | -2.9428  | 3.34138  | 0.4601   |
| H  | -4.57403 | 3.85545  | 0.90745  |
| Cu | 0.74319  | 2.11759  | -0.00891 |
| C  | 2.88532  | 1.10903  | 0.15231  |
| O  | 1.86203  | 0.65277  | 0.76192  |
| O  | 2.73458  | 2.17566  | -0.53383 |
| C  | 4.2194   | 0.46957  | 0.25417  |
| C  | 5.32917  | 1.33306  | 0.27501  |
| C  | 4.44325  | -0.91281 | 0.35075  |
| C  | 6.62082  | 0.83983  | 0.41938  |
| H  | 5.15191  | 2.39981  | 0.18936  |

|   |          |          |          |
|---|----------|----------|----------|
| C | 5.73786  | -1.41405 | 0.4797   |
| C | 6.8229   | -0.53644 | 0.52517  |
| H | 7.46289  | 1.52414  | 0.4459   |
| H | 5.90333  | -2.48368 | 0.54003  |
| H | 7.82603  | -0.93787 | 0.63524  |
| C | -0.02659 | 3.74606  | -0.70679 |
| N | -0.52042 | 4.7247   | -1.10654 |
| H | -4.57077 | 1.45529  | 0.2169   |
| I | 2.86922  | -2.37539 | 0.18823  |

B3LYP-D3(BJ)/6-311+G(d,p)-SDD(Cu,I)-SM  
D(EtOAc): E = -1638.40767619 hartree  
Corrected Gibbs Free Energy = -1638.120434 hartree

**Int4a**

|   |          |          |          |
|---|----------|----------|----------|
| C | -1.63692 | 1.70888  | -0.72857 |
| C | -4.71202 | -0.35311 | -1.3906  |
| C | -3.45705 | -0.26178 | -2.21949 |
| C | -2.42071 | -0.56236 | -1.16413 |
| C | -2.01134 | 0.50856  | -0.22219 |
| H | -3.4131  | -1.03027 | -2.99568 |
| H | -3.3394  | 0.73094  | -2.65837 |
| O | -2.06595 | -1.75386 | -1.01262 |
| C | -2.07044 | 0.17323  | 1.24552  |
| F | -2.56264 | 1.19564  | 1.97428  |
| F | -0.85865 | -0.1473  | 1.78162  |
| F | -2.8789  | -0.88622 | 1.4731   |
| C | -1.07834 | 2.91824  | -0.13368 |
| C | -1.12367 | 4.08168  | -0.93037 |
| C | -0.45333 | 2.9938   | 1.12851  |
| C | -0.60223 | 5.28735  | -0.47179 |
| H | -1.57865 | 4.0289   | -1.91579 |
| C | 0.08028  | 4.19787  | 1.57693  |
| H | -0.34488 | 2.11391  | 1.74536  |
| C | 0.00215  | 5.34837  | 0.78594  |
| H | -0.65598 | 6.17318  | -1.09738 |
| H | 0.56869  | 4.23556  | 2.54593  |
| H | 0.42152  | 6.28384  | 1.14446  |
| C | -5.22804 | 0.85628  | -0.68293 |
| H | -6.32587 | 0.84878  | -0.66162 |
| H | -4.90103 | 0.88362  | 0.36959  |
| H | -4.89363 | 1.78622  | -1.15404 |
| C | -5.23894 | -1.69838 | -1.01903 |
| H | -5.02981 | -2.44952 | -1.78806 |

|    |          |          |          |
|----|----------|----------|----------|
| H  | -4.78684 | -2.06296 | -0.08137 |
| H  | -6.32156 | -1.65716 | -0.84831 |
| Cu | -0.59484 | -2.57166 | 0.10053  |
| C  | 1.70513  | -1.96423 | -0.00258 |
| O  | 0.79521  | -1.383   | -0.68705 |
| O  | 1.34776  | -2.89947 | 0.78428  |
| C  | 3.14128  | -1.62249 | -0.16017 |
| C  | 4.04572  | -2.69843 | -0.16527 |
| C  | 3.64048  | -0.32293 | -0.33628 |
| C  | 5.40474  | -2.49089 | -0.37512 |
| H  | 3.6565   | -3.70019 | -0.01691 |
| C  | 5.00401  | -0.10758 | -0.53003 |
| C  | 5.88186  | -1.19329 | -0.56221 |
| H  | 6.0861   | -3.33571 | -0.38955 |
| H  | 5.38359  | 0.90096  | -0.6496  |
| H  | 6.94095  | -1.01575 | -0.72473 |
| C  | -1.66004 | -3.94541 | 0.94476  |
| N  | -2.31286 | -4.7723  | 1.44606  |
| I  | 2.38752  | 1.41821  | -0.1758  |
| H  | -1.75474 | 1.79602  | -1.80581 |

B3LYP-D3(BJ)/6-311+G(d,p)-SDD(Cu,I)-SM  
D(EtOAc): E = -1638.42083735 hartree  
Corrected Gibbs Free Energy = -1638.131533 hartree

**Int5a**

|   |         |          |          |
|---|---------|----------|----------|
| C | 3.43679 | -0.21385 | 0.38578  |
| C | 4.31002 | 0.32767  | -0.8096  |
| C | 3.27891 | 1.02077  | -1.73324 |
| C | 2.13557 | 1.42196  | -0.83277 |
| C | 2.27221 | 0.71796  | 0.41991  |
| H | 4.00556 | -0.13952 | 1.31848  |
| H | 3.67643 | 1.88949  | -2.26671 |
| H | 2.88055 | 0.33156  | -2.49038 |
| O | 1.24234 | 2.22221  | -1.18055 |
| C | 1.37278 | 0.81437  | 1.6113   |
| F | 2.0504  | 0.59001  | 2.75095  |
| F | 0.36411 | -0.0752  | 1.55283  |
| F | 0.8081  | 2.04803  | 1.71939  |
| C | 2.92969 | -1.65573 | 0.29674  |
| C | 3.33726 | -2.5808  | 1.26578  |
| C | 2.05803 | -2.07655 | -0.72007 |
| C | 2.90835 | -3.90708 | 1.20788  |
| H | 3.99917 | -2.25956 | 2.0654   |

|                                            |          |          |          |    |          |          |          |
|--------------------------------------------|----------|----------|----------|----|----------|----------|----------|
| C                                          | 1.63755  | -3.40572 | -0.78333 | H  | 0.86652  | -0.47936 | 3.32713  |
| H                                          | 1.7006   | -1.37805 | -1.46905 | O  | 0.69372  | -2.0896  | 1.17452  |
| C                                          | 2.05895  | -4.32442 | 0.18058  | C  | 1.21021  | -0.32265 | -1.23765 |
| H                                          | 3.24126  | -4.6136  | 1.96274  | F  | 1.98598  | 0.45847  | -2.06538 |
| H                                          | 0.97784  | -3.72065 | -1.58688 | F  | -0.06018 | -0.19022 | -1.72188 |
| H                                          | 1.72776  | -5.35758 | 0.13103  | F  | 1.55168  | -1.61754 | -1.55293 |
| C                                          | 5.26629  | 1.38974  | -0.24194 | C  | 1.75744  | 2.58016  | -0.02607 |
| H                                          | 5.84123  | 1.85705  | -1.04897 | C  | 2.73813  | 3.58331  | -0.08695 |
| H                                          | 4.72059  | 2.1835   | 0.28415  | C  | 0.51916  | 2.82327  | -0.63625 |
| H                                          | 5.9722   | 0.93956  | 0.46511  | C  | 2.48706  | 4.79748  | -0.73438 |
| C                                          | 5.10579  | -0.76074 | -1.52761 | H  | 3.70198  | 3.41763  | 0.39253  |
| H                                          | 5.78503  | -1.26823 | -0.83313 | C  | 0.26458  | 4.0329   | -1.2824  |
| H                                          | 4.45396  | -1.51591 | -1.97599 | H  | -0.24404 | 2.05453  | -0.61398 |
| H                                          | 5.71096  | -0.31593 | -2.32579 | C  | 1.24715  | 5.02626  | -1.33436 |
| Cu                                         | -0.54855 | 2.74703  | -0.36858 | H  | 3.25952  | 5.56137  | -0.7668  |
| C                                          | -2.40473 | 1.28026  | -0.14193 | H  | -0.70214 | 4.19648  | -1.75173 |
| O                                          | -1.33799 | 0.96887  | -0.77541 | H  | 1.04869  | 5.96717  | -1.83987 |
| O                                          | -2.44713 | 2.44346  | 0.38306  | C  | 2.79131  | 1.93408  | 3.06417  |
| C                                          | -3.57556 | 0.37475  | -0.0478  | H  | 2.56415  | 1.85594  | 4.13431  |
| C                                          | -4.8239  | 0.99784  | 0.13938  | H  | 3.76529  | 1.46297  | 2.88757  |
| C                                          | -3.53756 | -1.02685 | -0.15427 | H  | 2.87625  | 2.99996  | 2.82071  |
| C                                          | -5.99923 | 0.25938  | 0.19839  | C  | 0.34466  | 1.93993  | 2.49904  |
| H                                          | -4.84742 | 2.07843  | 0.22572  | H  | 0.37186  | 3.00778  | 2.25925  |
| C                                          | -4.71491 | -1.77187 | -0.0841  | H  | -0.45739 | 1.47965  | 1.9139   |
| C                                          | -5.94267 | -1.12969 | 0.08357  | H  | 0.08719  | 1.83874  | 3.56     |
| H                                          | -6.95072 | 0.76362  | 0.33398  | Cu | -0.84611 | -2.59762 | 0.08667  |
| H                                          | -4.67583 | -2.85292 | -0.15637 | C  | -2.98819 | -1.55543 | -0.08837 |
| H                                          | -6.85116 | -1.72319 | 0.12853  | O  | -2.0798  | -1.1012  | 0.68036  |
| C                                          | -0.12034 | 4.59615  | -0.01048 | O  | -2.71565 | -2.58007 | -0.79866 |
| N                                          | 0.15209  | 5.71117  | 0.19801  | C  | -4.35962 | -0.97896 | -0.12432 |
| I                                          | -1.71928 | -2.16542 | -0.32637 | C  | -5.41411 | -1.8946  | -0.29159 |
| B3LYP-D3(BJ)/6-311+G(d,p)-SDD(Cu,I)-SM     |          |          |          |    |          |          |          |
| D(EtOAc): E = -1638.44906459 hartree       |          |          |          |    |          |          |          |
| Corrected Gibbs Free Energy = -1638.156616 |          |          |          |    |          |          |          |
| hartree                                    |          |          |          |    |          |          |          |
| <b>Int5b</b>                               |          |          |          |    |          |          |          |
| C                                          | 2.06139  | 1.28171  | 0.69147  | H  | -7.53813 | -2.20562 | -0.39515 |
| C                                          | 1.69663  | 1.26632  | 2.23093  | H  | -6.23632 | 1.85965  | 0.13423  |
| C                                          | 1.57242  | -0.24876 | 2.52189  | H  | -8.06549 | 0.21717  | -0.10239 |
| C                                          | 1.13568  | -0.8559  | 1.20695  | C  | 0.0113   | -4.22994 | -0.57843 |
| C                                          | 1.39146  | 0.01271  | 0.18007  | N  | 0.72845  | -5.09609 | -0.89866 |
| H                                          | 3.15342  | 1.14987  | 0.66011  | I  | -3.18104 | 1.92173  | 0.16284  |
| H                                          | 2.54539  | -0.68216 | 2.7942   | C  | 4.94634  | -1.01726 | 0.46728  |
|                                            |          |          |          | O  | 5.41754  | 0.15149  | 0.64738  |



|   |         |          |          |
|---|---------|----------|----------|
| O | 4.65927 | -1.4493  | -0.69484 |
| O | 4.74299 | -1.75407 | 1.49212  |
| K | 4.5791  | 1.03247  | -1.8415  |
| K | 2.86392 | -3.42303 | 0.13434  |

B3LYP-D3(BJ)/6-311+G(d,p)-SDD(Cu,I)-SM  
D(EtOAc): E = -3102.43162934 hartree  
Corrected Gibbs Free Energy = 3102.136319  
hartree

**Int6**

|    |          |          |          |
|----|----------|----------|----------|
| C  | 1.94105  | 1.59079  | 0.5329   |
| C  | 2.06466  | 1.53405  | 2.06992  |
| C  | 1.66908  | 0.06383  | 2.39335  |
| C  | 1.79631  | -0.67392 | 1.09017  |
| C  | 1.94554  | 0.23634  | 0.05235  |
| H  | 2.28875  | -0.38496 | 3.17897  |
| H  | 0.62331  | -0.00528 | 2.72547  |
| O  | 1.73803  | -1.98936 | 1.03172  |
| C  | 2.13861  | -0.21395 | -1.34921 |
| F  | 2.73186  | 0.69311  | -2.14502 |
| F  | 0.97705  | -0.58595 | -1.97103 |
| F  | 2.94217  | -1.33559 | -1.42833 |
| C  | 1.70703  | 2.78991  | -0.23268 |
| C  | 2.18906  | 4.05929  | 0.18467  |
| C  | 0.93467  | 2.76604  | -1.42682 |
| C  | 1.91907  | 5.21494  | -0.54039 |
| H  | 2.80801  | 4.13276  | 1.07062  |
| C  | 0.66688  | 3.92527  | -2.14503 |
| H  | 0.51112  | 1.83068  | -1.76882 |
| C  | 1.15511  | 5.16322  | -1.71137 |
| H  | 2.31589  | 6.16538  | -0.19245 |
| H  | 0.06177  | 3.86305  | -3.04605 |
| H  | 0.94447  | 6.06799  | -2.27421 |
| C  | 3.53106  | 1.75704  | 2.50106  |
| H  | 3.62908  | 1.63862  | 3.58773  |
| H  | 4.18951  | 1.02554  | 2.01691  |
| H  | 3.88944  | 2.75673  | 2.23712  |
| C  | 1.1312   | 2.50399  | 2.80913  |
| H  | 1.40904  | 3.55025  | 2.6572   |
| H  | 0.09633  | 2.37641  | 2.47302  |
| H  | 1.16621  | 2.30298  | 3.88692  |
| Cu | 0.16421  | -2.7044  | 0.06452  |
| C  | -2.05927 | -1.83666 | 0.09129  |

|   |          |          |          |
|---|----------|----------|----------|
| O | -1.11066 | -1.33321 | 0.77921  |
| O | -1.80862 | -2.88139 | -0.59521 |
| C | -3.42568 | -1.25493 | 0.11211  |
| C | -4.50094 | -2.15965 | 0.11462  |
| C | -3.70275 | 0.12147  | 0.14843  |
| C | -5.81567 | -1.71162 | 0.18441  |
| H | -4.28079 | -3.2213  | 0.07412  |
| C | -5.02048 | 0.57538  | 0.1999   |
| C | -6.07339 | -0.34119 | 0.23018  |
| H | -6.63267 | -2.42624 | 0.19858  |
| H | -5.22747 | 1.63971  | 0.21105  |
| H | -7.09493 | 0.02438  | 0.28005  |
| C | 1.14574  | -4.18471 | -0.75255 |
| N | 1.93069  | -4.96274 | -1.13323 |
| I | -2.16564 | 1.61939  | -0.01896 |
| K | 3.86181  | -3.3084  | 0.13606  |

B3LYP-D3(BJ)/6-311+G(d,p)-SDD(Cu,I)-SM  
D(EtOAc): E = -2237.89238729 hartree  
Corrected Gibbs Free Energy = -2237.614148  
hartree

**Int7**

|   |          |          |          |
|---|----------|----------|----------|
| C | 0.36894  | -0.47837 | 0.94692  |
| C | -1.3286  | 1.40975  | -0.00654 |
| C | -2.67732 | 1.1888   | 0.75922  |
| C | -2.12076 | -0.1063  | 1.30633  |
| C | -0.93163 | -0.12428 | 0.29605  |
| H | 0.26877  | -0.98988 | 1.90082  |
| H | -2.96938 | 1.94037  | 1.499    |
| H | -3.52104 | 0.99898  | 0.0861   |
| O | -2.36629 | -0.81348 | 2.24952  |
| C | -1.26678 | -1.10607 | -0.82526 |
| F | -1.11246 | -2.38129 | -0.40919 |
| F | -0.49141 | -0.94917 | -1.9208  |
| F | -2.55636 | -0.99416 | -1.24405 |
| C | 1.68191  | -0.24262 | 0.47869  |
| C | 2.77756  | -0.63669 | 1.30341  |
| C | 1.99397  | 0.37593  | -0.76657 |
| C | 4.08887  | -0.42047 | 0.91248  |
| H | 2.56424  | -1.11234 | 2.2571   |
| C | 3.31126  | 0.58928  | -1.14551 |
| H | 1.19479  | 0.67057  | -1.43384 |
| C | 4.36917  | 0.19708  | -0.31466 |
| H | 4.90256  | -0.73098 | 1.56231  |

|   |          |         |          |
|---|----------|---------|----------|
| H | 3.52128  | 1.06337 | -2.10055 |
| H | 5.39736  | 0.36753 | -0.61984 |
| C | -0.43097 | 2.37277 | 0.77261  |
| H | -0.87559 | 3.37443 | 0.75136  |
| H | -0.32393 | 2.0739  | 1.82119  |
| H | 0.56964  | 2.43406 | 0.33583  |
| C | -1.47239 | 1.8679  | -1.45512 |
| H | -0.49981 | 1.93876 | -1.95275 |
| H | -2.11594 | 1.21139 | -2.04447 |
| H | -1.91998 | 2.86893 | -1.46432 |

B3LYP-D3(BJ)/6-311+G(d,p)-SDD(Cu,I)-SM  
D(EtOAc): E = -916.958139716 hartree  
Corrected Gibbs Free Energy = -916.749894  
hartree

**Int8**

|   |          |          |          |
|---|----------|----------|----------|
| C | 2.26777  | -2.00617 | 0.00878  |
| C | 2.08651  | -2.19931 | -1.55586 |
| C | 1.72985  | -0.77919 | -2.08109 |
| C | 2.2677   | 0.15308  | -1.02702 |
| C | 2.52383  | -0.54227 | 0.14325  |
| H | 3.15596  | -2.56277 | 0.33644  |
| H | 2.16441  | -0.5662  | -3.06311 |
| H | 0.64492  | -0.63427 | -2.15958 |
| O | 2.46458  | 1.42567  | -1.20028 |
| C | 2.87864  | 0.1274   | 1.43122  |
| F | 3.19579  | -0.75806 | 2.39118  |
| F | 1.82393  | 0.86358  | 1.89758  |
| F | 3.91181  | 0.98102  | 1.29677  |
| C | 1.12484  | -2.47703 | 0.90413  |
| C | 1.26634  | -3.66722 | 1.62887  |
| C | -0.07361 | -1.75836 | 1.00483  |
| C | 0.22197  | -4.14227 | 2.42199  |
| H | 2.197    | -4.22521 | 1.5642   |
| C | -1.1179  | -2.23091 | 1.8005   |
| H | -0.19547 | -0.83537 | 0.45279  |
| C | -0.97401 | -3.42412 | 2.51092  |
| H | 0.34244  | -5.07179 | 2.97147  |
| H | -2.04257 | -1.66415 | 1.86231  |
| H | -1.78564 | -3.79161 | 3.13259  |
| C | 3.44522  | -2.62569 | -2.13296 |
| H | 3.39495  | -2.69911 | -3.22525 |
| H | 4.22976  | -1.90234 | -1.87896 |
| H | 3.74568  | -3.60377 | -1.73936 |

|    |          |          |          |
|----|----------|----------|----------|
| C  | 1.01672  | -3.22667 | -1.92443 |
| H  | 1.25876  | -4.2142  | -1.5155  |
| H  | 0.0306   | -2.93744 | -1.54912 |
| H  | 0.95223  | -3.32047 | -3.01499 |
| Cu | 1.12228  | 2.51897  | -0.39397 |
| C  | -1.07607 | 1.91885  | 0.2302   |
| O  | -0.28633 | 1.19108  | -0.47937 |
| O  | -0.62205 | 3.067    | 0.54855  |
| C  | -2.38431 | 1.43696  | 0.69907  |
| C  | -2.88237 | 2.03103  | 1.87422  |
| C  | -3.12906 | 0.41033  | 0.08925  |
| C  | -4.07717 | 1.60559  | 2.44024  |
| H  | -2.30085 | 2.81953  | 2.3394   |
| C  | -4.33211 | -0.01154 | 0.6522   |
| C  | -4.79883 | 0.57992  | 1.82852  |
| H  | -4.44108 | 2.06837  | 3.3516   |
| H  | -4.90748 | -0.79789 | 0.17741  |
| H  | -5.73383 | 0.2346   | 2.25942  |
| C  | 2.26594  | 4.02024  | -0.25046 |
| N  | 2.96119  | 4.95149  | -0.15419 |
| I  | -2.57202 | -0.53606 | -1.75842 |

B3LYP-D3(BJ)/6-311+G(d,p)-SDD(Cu,I)-SM  
D(EtOAc): E = -1638.42623790 hartree  
Corrected Gibbs Free Energy = -1638.129723  
hartree

**TS<sub>2-3a</sub>**

|   |          |          |          |
|---|----------|----------|----------|
| C | -3.52081 | -0.26274 | 0.46023  |
| C | -3.96163 | 3.27828  | -0.11014 |
| C | -2.58098 | 3.06044  | 0.56594  |
| C | -1.94661 | 1.77308  | 0.13289  |
| C | -2.59839 | 0.55099  | 0.49257  |
| H | -1.89898 | 3.87683  | 0.30853  |
| H | -2.71178 | 3.03462  | 1.6547   |
| O | -0.90625 | 1.78286  | -0.55621 |
| C | -0.85494 | -0.5122  | 1.85415  |
| F | -1.57477 | -1.00603 | 2.85543  |
| F | 0.06539  | 0.33267  | 2.30875  |
| F | -0.28136 | -1.51014 | 1.17237  |
| C | -4.47654 | -1.29486 | 0.45366  |
| C | -4.36007 | -2.35135 | -0.47798 |
| C | -5.54866 | -1.27685 | 1.3737   |
| C | -5.3034  | -3.37147 | -0.47727 |
| H | -3.54369 | -2.34149 | -1.1922  |

|                                            |          |          |          |                                        |          |          |          |
|--------------------------------------------|----------|----------|----------|----------------------------------------|----------|----------|----------|
| C                                          | -6.47768 | -2.30954 | 1.3661   | H                                      | -3.12501 | 1.1621   | 2.95868  |
| H                                          | -5.62895 | -0.45905 | 2.08234  | O                                      | -0.84399 | 1.63087  | 1.18917  |
| C                                          | -6.35711 | -3.35481 | 0.44328  | C                                      | -1.24022 | -0.84901 | -0.1952  |
| H                                          | -5.21908 | -4.18263 | -1.19381 | F                                      | -1.66326 | -1.95487 | -0.82319 |
| H                                          | -7.29884 | -2.30229 | 2.07627  | F                                      | -0.36289 | -1.22723 | 0.7561   |
| H                                          | -7.08833 | -4.15787 | 0.44046  | F                                      | -0.52311 | -0.14192 | -1.1249  |
| C                                          | -4.54577 | 4.6139   | 0.35823  | C                                      | -4.50225 | -1.29621 | -0.4007  |
| H                                          | -4.63547 | 4.65284  | 1.45026  | C                                      | -5.58596 | -0.87825 | -1.20476 |
| H                                          | -3.91251 | 5.45151  | 0.03993  | C                                      | -4.33352 | -2.67326 | -0.1356  |
| H                                          | -5.54318 | 4.76617  | -0.06993 | C                                      | -6.43921 | -1.81671 | -1.7738  |
| C                                          | -3.85314 | 3.21709  | -1.63751 | H                                      | -5.73213 | 0.1819   | -1.38873 |
| H                                          | -3.14091 | 3.96406  | -2.01064 | C                                      | -5.21523 | -3.59955 | -0.68187 |
| H                                          | -3.5245  | 2.23215  | -1.98886 | H                                      | -3.5224  | -3.0005  | 0.50445  |
| H                                          | -4.82648 | 3.42212  | -2.0974  | C                                      | -6.26047 | -3.17852 | -1.51011 |
| Cu                                         | -0.08933 | 0.12186  | -1.39286 | H                                      | -7.25434 | -1.48669 | -2.41088 |
| C                                          | 2.05626  | -0.77389 | -0.90175 | H                                      | -5.08273 | -4.65586 | -0.46704 |
| O                                          | 1.61727  | 0.31352  | -0.39524 | H                                      | -6.93899 | -3.90863 | -1.94134 |
| O                                          | 1.30793  | -1.36629 | -1.75091 | C                                      | -5.59386 | 1.81984  | 2.3338   |
| C                                          | 3.3539   | -1.3755  | -0.50734 | H                                      | -5.5491  | 0.91824  | 2.95555  |
| C                                          | 3.49462  | -2.75539 | -0.74869 | H                                      | -5.6092  | 2.68943  | 3.00848  |
| C                                          | 4.4234   | -0.69353 | 0.09789  | H                                      | -6.53944 | 1.81457  | 1.78069  |
| C                                          | 4.64797  | -3.44038 | -0.38823 | C                                      | -4.49716 | 2.98777  | 0.33615  |
| H                                          | 2.66814  | -3.27591 | -1.21913 | H                                      | -4.45479 | 3.9794   | 0.81104  |
| C                                          | 5.58857  | -1.37514 | 0.45109  | H                                      | -3.669   | 2.9343   | -0.3793  |
| C                                          | 5.69702  | -2.74617 | 0.21481  | H                                      | -5.43978 | 2.92788  | -0.21904 |
| H                                          | 4.72809  | -4.5061  | -0.57764 | Cu                                     | 0.5484   | 1.9589   | -0.26225 |
| H                                          | 6.41225  | -0.83903 | 0.90843  | C                                      | 2.79588  | 1.21476  | -0.37092 |
| H                                          | 6.60749  | -3.26437 | 0.5014   | O                                      | 2.03713  | 0.97434  | 0.62639  |
| C                                          | -1.58649 | -0.29298 | -2.54293 | O                                      | 2.31722  | 1.92795  | -1.31544 |
| N                                          | -2.51429 | -0.53755 | -3.2078  | C                                      | 4.19696  | 0.73312  | -0.43722 |
| H                                          | -4.62412 | 2.47034  | 0.22523  | C                                      | 5.14059  | 1.6182   | -0.98776 |
| I                                          | 4.44527  | 1.42747  | 0.47667  | C                                      | 4.6366   | -0.51908 | 0.01892  |
| B3LYP-D3(BJ)/6-311+G(d,p)-SDD(Cu,I)-SM     |          |          |          | C                                      | 6.48798  | 1.28137  | -1.05225 |
| D(EtOAc): E = -1638.35229620 hartree       |          |          |          | H                                      | 4.79434  | 2.58033  | -1.35015 |
| Corrected Gibbs Free Energy = -1638.070334 |          |          |          | C                                      | 5.9839   | -0.8688  | -0.0592  |
| hartree                                    |          |          |          | C                                      | 6.90858  | 0.03639  | -0.58372 |
| TS <sub>3a-4a</sub>                        |          |          |          | H                                      | 7.20316  | 1.98374  | -1.46846 |
| C                                          | -3.67439 | -0.29508 | 0.20604  | H                                      | 6.3129   | -1.84373 | 0.28222  |
| C                                          | -4.41465 | 1.90298  | 1.3907   | H                                      | 7.95701  | -0.24299 | -0.63108 |
| C                                          | -3.04546 | 1.79653  | 2.06493  | C                                      | -0.65205 | 3.04163  | -1.3253  |
| C                                          | -1.99509 | 1.16022  | 1.18172  | N                                      | -1.42167 | 3.66826  | -1.93911 |
| C                                          | -2.36681 | -0.02786 | 0.38779  | H                                      | -4.36438 | 0.78189  | 0.75078  |
| H                                          | -2.66603 | 2.77518  | 2.37958  | I                                      | 3.29403  | -2.03714 | 0.74567  |
|                                            |          |          |          | B3LYP-D3(BJ)/6-311+G(d,p)-SDD(Cu,I)-SM |          |          |          |

D(EtOAc): E = -1638.38554492 hartree  
Corrected Gibbs Free Energy = -1638.103171  
hartree

**TS<sub>4-7</sub>**

|   |          |          |          |
|---|----------|----------|----------|
| C | 0.42036  | 0.60468  | 0.75758  |
| C | -1.95535 | 1.26434  | -0.82926 |
| C | -2.42982 | 1.73749  | 0.53979  |
| C | -1.98918 | 0.50379  | 1.30616  |
| C | -0.80761 | -0.02097 | 0.48691  |
| H | 0.32749  | 1.49889  | 1.3712   |
| H | -1.88331 | 2.62491  | 0.88022  |
| H | -3.5037  | 1.93268  | 0.62752  |
| O | -2.51715 | -0.05266 | 2.24123  |
| C | -0.90601 | -1.44698 | 0.01074  |
| F | -0.07015 | -2.29135 | 0.66088  |
| F | -0.61641 | -1.56811 | -1.31625 |
| F | -2.15352 | -1.9448  | 0.16354  |
| C | 1.78205  | 0.34867  | 0.34864  |
| C | 2.78296  | 1.16254  | 0.93982  |
| C | 2.20805  | -0.62426 | -0.58793 |
| C | 4.12748  | 1.00441  | 0.63144  |
| H | 2.48145  | 1.92238  | 1.65637  |
| C | 3.55599  | -0.7748  | -0.8944  |
| H | 1.48915  | -1.24946 | -1.09592 |
| C | 4.52602  | 0.02969  | -0.28876 |
| H | 4.86751  | 1.64241  | 1.10683  |
| H | 3.85276  | -1.52714 | -1.6202  |
| H | 5.57628  | -0.09719 | -0.53494 |
| C | -0.98254 | 2.09732  | -1.60391 |
| H | -1.51406 | 2.92837  | -2.09523 |
| H | -0.2097  | 2.53164  | -0.96312 |
| H | -0.49367 | 1.50989  | -2.38915 |
| C | -2.94214 | 0.46613  | -1.63182 |
| H | -2.45098 | -0.11556 | -2.41739 |
| H | -3.53788 | -0.21233 | -1.01443 |
| H | -3.64509 | 1.15784  | -2.12518 |

B3LYP-D3(BJ)/6-311+G(d,p)-SDD(Cu,I)-SM

D(EtOAc): E = -916.932729439 hartree  
Corrected Gibbs Free Energy = -916.728062  
hartree

**TS<sub>4a-5a</sub>**

|   |          |         |         |
|---|----------|---------|---------|
| C | -3.17364 | 0.54548 | 0.15894 |
|---|----------|---------|---------|

|    |          |          |          |
|----|----------|----------|----------|
| C  | -2.39454 | 0.54765  | 2.72755  |
| C  | -2.21031 | 1.99257  | 2.33388  |
| C  | -1.53591 | 2.13488  | 0.97441  |
| C  | -2.08208 | 1.36271  | -0.11429 |
| H  | -3.85746 | 0.88744  | 0.92592  |
| H  | -3.17987 | 2.50819  | 2.31374  |
| H  | -1.57215 | 2.52455  | 3.05409  |
| O  | -0.49839 | 2.83791  | 0.91041  |
| C  | -1.42645 | 1.43845  | -1.46373 |
| F  | -2.20662 | 0.96076  | -2.45099 |
| F  | -0.23812 | 0.76658  | -1.54678 |
| F  | -1.14472 | 2.72377  | -1.78605 |
| C  | -3.59321 | -0.68237 | -0.47802 |
| C  | -4.9235  | -1.11181 | -0.27994 |
| C  | -2.70618 | -1.51947 | -1.19085 |
| C  | -5.36731 | -2.31463 | -0.81689 |
| H  | -5.60058 | -0.48533 | 0.29421  |
| C  | -3.15019 | -2.72856 | -1.70982 |
| H  | -1.66772 | -1.23735 | -1.30658 |
| C  | -4.48138 | -3.12479 | -1.53369 |
| H  | -6.39633 | -2.62782 | -0.66961 |
| H  | -2.4578  | -3.36842 | -2.24857 |
| H  | -4.82319 | -4.07058 | -1.94374 |
| C  | -3.59425 | 0.16495  | 3.52498  |
| H  | -3.44562 | 0.39279  | 4.59544  |
| H  | -4.49143 | 0.71141  | 3.20857  |
| H  | -3.78995 | -0.91166 | 3.45558  |
| C  | -1.19042 | -0.32913 | 2.75278  |
| H  | -1.46574 | -1.38947 | 2.74247  |
| H  | -0.50799 | -0.13264 | 1.91998  |
| H  | -0.6084  | -0.15665 | 3.67656  |
| Cu | 1.24954  | 2.59481  | -0.0458  |
| C  | 2.59658  | 0.63063  | 0.06273  |
| O  | 1.50878  | 0.73983  | 0.71855  |
| O  | 2.9771   | 1.63746  | -0.62326 |
| C  | 3.44092  | -0.5908  | 0.10761  |
| C  | 4.83235  | -0.38554 | 0.10041  |
| C  | 2.96055  | -1.90861 | 0.16469  |
| C  | 5.71867  | -1.45355 | 0.17969  |
| H  | 5.20039  | 0.63309  | 0.04167  |
| C  | 3.84501  | -2.98496 | 0.22872  |
| C  | 5.22193  | -2.75531 | 0.24707  |
| H  | 6.78852  | -1.27073 | 0.1838   |
| H  | 3.46461  | -3.99975 | 0.25734  |

H 5.90092 -3.60104 0.3043  
 C 1.4591 4.37687 -0.77045  
 N 1.59288 5.45591 -1.19369  
 I 0.86894 -2.40484 0.03119  
 B3LYP-D3(BJ)/6-311+G(d,p)-SDD(Cu,I)-SM  
 D(EtOAc): E = -1638.41137878 hartree  
 Corrected Gibbs Free Energy = -1638.122661  
 hartree

**TS<sub>5b-6</sub>**

C -2.05182 -1.18831 0.82669  
 C -1.82768 -1.30893 2.37816  
 C -1.54566 0.15868 2.77407  
 C -0.98356 0.80247 1.52945  
 C -1.26577 -0.0182 0.4192  
 H -3.19712 -0.82806 0.72122  
 H -2.4765 0.68632 3.00793  
 H -0.85716 0.2596 3.61936  
 O -0.39863 1.93422 1.58577  
 C -1.0391 0.38676 -0.98532  
 F -1.82938 -0.29507 -1.86773  
 F 0.23451 0.21372 -1.42785  
 F -1.31223 1.71228 -1.21405  
 C -1.98899 -2.45593 0.01844  
 C -3.12854 -3.26883 -0.10196  
 C -0.80705 -2.862 -0.62129  
 C -3.08617 -4.45336 -0.84237  
 H -4.05214 -2.96305 0.38043  
 C -0.76295 -4.04545 -1.35765  
 H 0.08086 -2.24416 -0.54281  
 C -1.90279 -4.84609 -1.47303  
 H -3.97831 -5.06875 -0.92382  
 H 0.16373 -4.34075 -1.84284  
 H -1.86868 -5.76755 -2.04752  
 C -3.05135 -1.88082 3.09538  
 H -2.89673 -1.86898 4.181  
 H -3.94766 -1.29656 2.86534  
 H -3.23106 -2.92032 2.79725  
 C -0.58868 -2.17026 2.67383  
 H -0.72961 -3.2016 2.33478  
 H 0.30311 -1.76665 2.18073  
 H -0.39953 -2.19091 3.75365  
 Cu 1.015 2.60381 0.39257  
 C 3.08562 1.51135 -0.05517

O 2.26879 1.09527 0.83097  
 O 2.78067 2.5748 -0.69182  
 C 4.37528 0.8254 -0.32193  
 C 5.45142 1.64398 -0.70916  
 C 4.59881 -0.55483 -0.1911  
 C 6.7169 1.11398 -0.93226  
 H 5.27139 2.70806 -0.81763  
 C 5.86275 -1.09424 -0.4286  
 C 6.92166 -0.25838 -0.78801  
 H 7.53597 1.76649 -1.21779  
 H 6.02339 -2.16251 -0.33689  
 H 7.90369 -0.68922 -0.96009  
 C 0.07179 4.21743 -0.1652  
 N -0.65348 5.07834 -0.47918  
 I 3.04043 -1.9693 0.26685  
 C -4.38076 0.97884 0.23102  
 O -4.52873 -0.35283 0.27529  
 O -4.71625 1.54913 -0.87273  
 O -3.88804 1.58542 1.22543  
 K -4.48523 -0.64873 -2.2982  
 K -3.07634 3.59804 -0.19662

B3LYP-D3(BJ)/6-311+G(d,p)-SDD(Cu,I)-SM  
 D(EtOAc): E = -3102.42767379 hartree  
 Corrected Gibbs Free Energy = -3102.130248

**MECP1**

C 1.922902 1.625477 0.530531  
 C 2.060364 1.561988 2.066903  
 C 1.700431 0.081852 2.387560  
 C 1.805788 -0.646520 1.078173  
 C 1.933903 0.258426 0.045032  
 H 2.350472 -0.362096 3.151449  
 H 0.666446 -0.012878 2.749462  
 O 1.754650 -1.973948 1.036494  
 C 2.124622 -0.183550 -1.358040  
 F 2.708227 0.731259 -2.152647  
 F 0.963872 -0.563127 -1.980525  
 F 2.933706 -1.302143 -1.449650  
 C 1.645874 2.818746 -0.224009  
 C 2.084251 4.102633 0.204618  
 C 0.880911 2.786655 -1.424666  
 C 1.781223 5.255876 -0.510762  
 H 2.696072 4.189377 1.093929  
 C 0.582196 3.944172 -2.133720

|                                        |           |           |           |                                        |           |           |           |
|----------------------------------------|-----------|-----------|-----------|----------------------------------------|-----------|-----------|-----------|
| H                                      | 0.488152  | 1.843583  | -1.781481 | C                                      | 2.871638  | 0.142641  | 1.439223  |
| C                                      | 1.026757  | 5.194105  | -1.687462 | F                                      | 3.189426  | -0.743148 | 2.399479  |
| H                                      | 2.147149  | 6.214193  | -0.150851 | F                                      | 1.810443  | 0.873576  | 1.909445  |
| H                                      | -0.012652 | 3.871370  | -3.040801 | F                                      | 3.899306  | 1.006130  | 1.318270  |
| H                                      | 0.794531  | 6.097039  | -2.245154 | C                                      | 1.122675  | -2.472900 | 0.906618  |
| C                                      | 3.521948  | 1.817871  | 2.494752  | C                                      | 1.264387  | -3.665947 | 1.625809  |
| H                                      | 3.629795  | 1.693448  | 3.580056  | C                                      | -0.078805 | -1.761098 | 1.009749  |
| H                                      | 4.196116  | 1.106715  | 2.001470  | C                                      | 0.222754  | -4.145343 | 2.421152  |
| H                                      | 3.855148  | 2.828420  | 2.238037  | H                                      | 2.195597  | -4.223079 | 1.558253  |
| C                                      | 1.102972  | 2.500905  | 2.817668  | C                                      | -1.121609 | -2.237313 | 1.805053  |
| H                                      | 1.348643  | 3.556397  | 2.673334  | H                                      | -0.203764 | -0.837805 | 0.459636  |
| H                                      | 0.070298  | 2.346548  | 2.484164  | C                                      | -0.974295 | -3.430868 | 2.514399  |
| H                                      | 1.148948  | 2.292985  | 3.893802  | H                                      | 0.347306  | -5.075219 | 2.969571  |
| Cu                                     | 0.217738  | -2.693139 | 0.061734  | H                                      | -2.047799 | -1.672682 | 1.868422  |
| C                                      | -2.000301 | -1.860178 | 0.081251  | H                                      | -1.783598 | -3.800031 | 3.138367  |
| O                                      | -1.052365 | -1.308101 | 0.729643  | C                                      | 3.435658  | -2.594968 | -2.135645 |
| O                                      | -1.721748 | -2.925248 | -0.569455 | H                                      | 3.379753  | -2.663948 | -3.228066 |
| C                                      | -3.380415 | -1.321733 | 0.112440  | H                                      | 4.218684  | -1.869910 | -1.882659 |
| C                                      | -4.427812 | -2.258846 | 0.133021  | H                                      | 3.742194  | -3.573948 | -1.748724 |
| C                                      | -3.694126 | 0.047221  | 0.157818  | C                                      | 1.010656  | -3.204873 | -1.921750 |
| C                                      | -5.753220 | -1.848735 | 0.228543  | H                                      | 1.254907  | -4.193677 | -1.516727 |
| H                                      | -4.177975 | -3.313702 | 0.089343  | H                                      | 0.023832  | -2.920211 | -1.544568 |
| C                                      | -5.022945 | 0.460932  | 0.239189  | H                                      | 0.945694  | -3.295015 | -3.012704 |
| C                                      | -6.048039 | -0.486310 | 0.286434  | Cu                                     | 1.088144  | 2.465818  | -0.387159 |
| H                                      | -6.549418 | -2.586410 | 0.256747  | C                                      | -1.097698 | 1.896468  | 0.233115  |
| H                                      | -5.259340 | 1.519069  | 0.261620  | O                                      | -0.326249 | 1.158927  | -0.485803 |
| H                                      | -7.077938 | -0.149584 | 0.359979  | O                                      | -0.602579 | 3.033131  | 0.550566  |
| C                                      | 1.222509  | -4.162673 | -0.756572 | C                                      | -2.410493 | 1.448856  | 0.708695  |
| N                                      | 2.019153  | -4.925001 | -1.142667 | C                                      | -2.896206 | 2.063008  | 1.879002  |
| I                                      | -2.208617 | 1.592163  | -0.039549 | C                                      | -3.170218 | 0.426310  | 0.108861  |
| K                                      | 3.925182  | -3.221498 | 0.144688  | C                                      | -4.093619 | 1.656557  | 2.453289  |
| B3LYP-D3(BJ)/6-311+G(d,p)-SDD(Cu,I)-SM |           |           |           | H                                      | -2.304455 | 2.848813  | 2.335896  |
| D(EtOAc): E = -2237.8913894 hartree    |           |           |           | C                                      | -4.374239 | 0.023457  | 0.682296  |
| <b>MECP2</b>                           |           |           |           | C                                      | -4.827181 | 0.630834  | 1.855933  |
| C                                      | 2.265611  | -1.993103 | 0.016928  | H                                      | -4.449667 | 2.132357  | 3.360963  |
| C                                      | 2.078260  | -2.176250 | -1.549401 | H                                      | -4.961146 | -0.760027 | 0.217159  |
| C                                      | 1.716143  | -0.753294 | -2.067845 | H                                      | -5.762048 | 0.297329  | 2.296495  |
| C                                      | 2.255275  | 0.166070  | -1.000997 | C                                      | 2.214688  | 3.963190  | -0.230718 |
| C                                      | 2.522160  | -0.523401 | 0.149850  | N                                      | 2.895635  | 4.903899  | -0.130492 |
| H                                      | 3.155143  | -2.551284 | 0.335334  | I                                      | -2.633509 | -0.534329 | -1.735612 |
| H                                      | 2.161225  | -0.537317 | -3.044685 | B3LYP-D3(BJ)/6-311+G(d,p)-SDD(Cu,I)-SM |           |           |           |
| H                                      | 0.632428  | -0.612578 | -2.157191 | D(EtOAc): E = -1638.424815 hartree     |           |           |           |
| O                                      | 2.445940  | 1.459762  | -1.173162 |                                        |           |           |           |

## 5. NMR spectra

LSY-KT3-3A

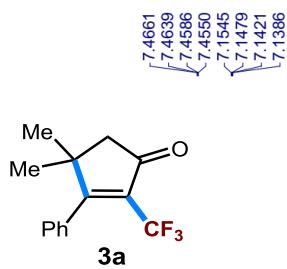

$^1\text{H}$  NMR (600 MHz,  $\text{CDCl}_3$ )

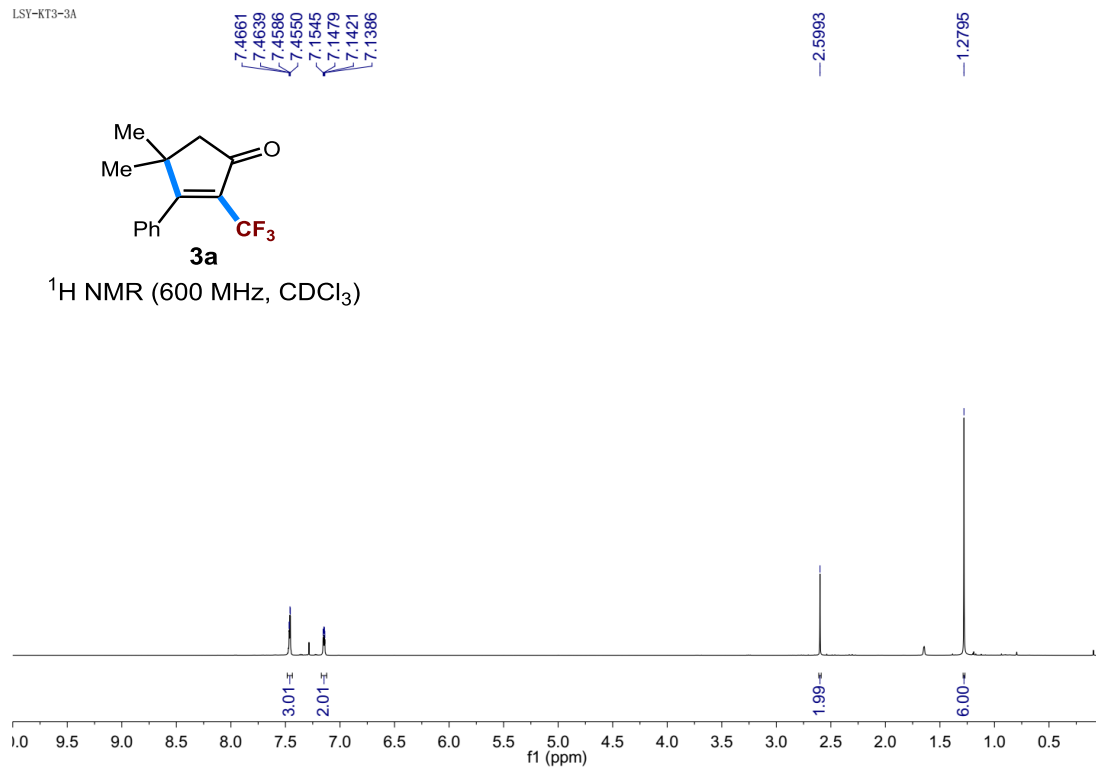

LSY-KT3-3A

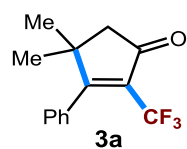

$^{13}\text{C}$  NMR (151 MHz,  $\text{CDCl}_3$ )

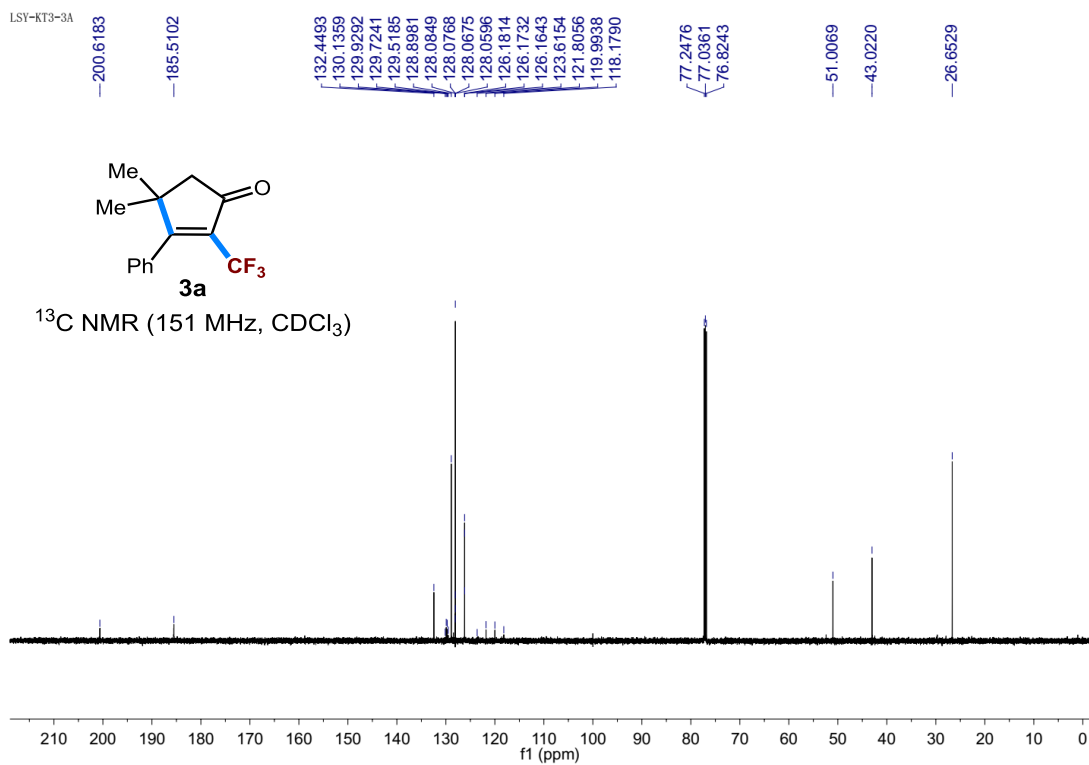

LSY-KT3-3A

-60.39

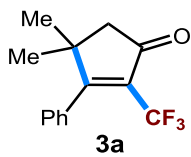

$^{19}\text{F}$  NMR (565 MHz,  $\text{CDCl}_3$ )

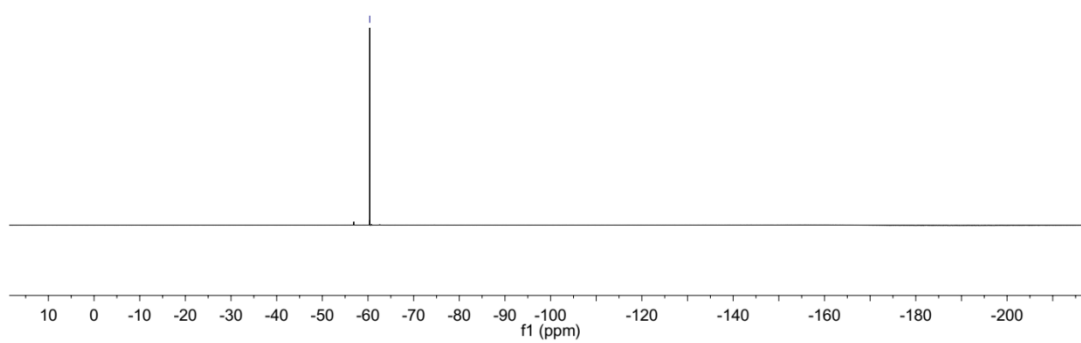

LSY-KT2-279

7.7869  
7.7738  
7.2936  
7.2817

-2.6277

-1.2792

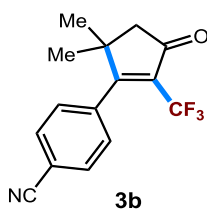

$^1\text{H}$  NMR (600 MHz,  $\text{CDCl}_3$ )

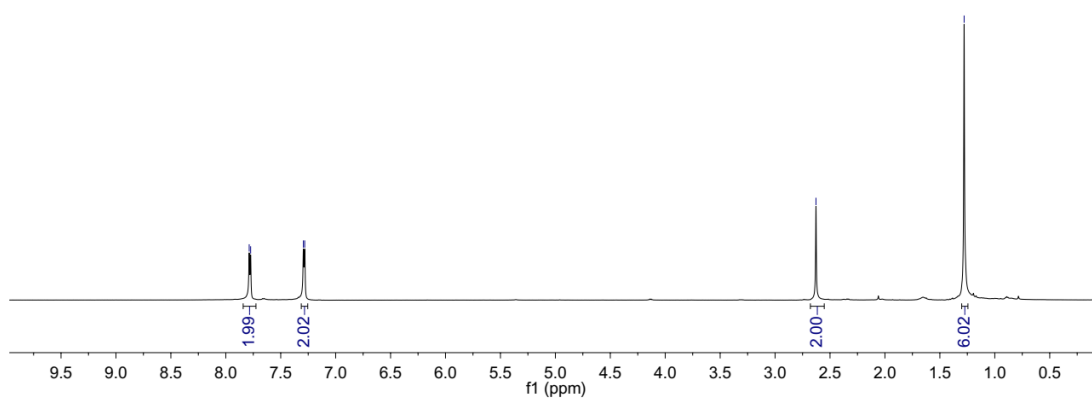



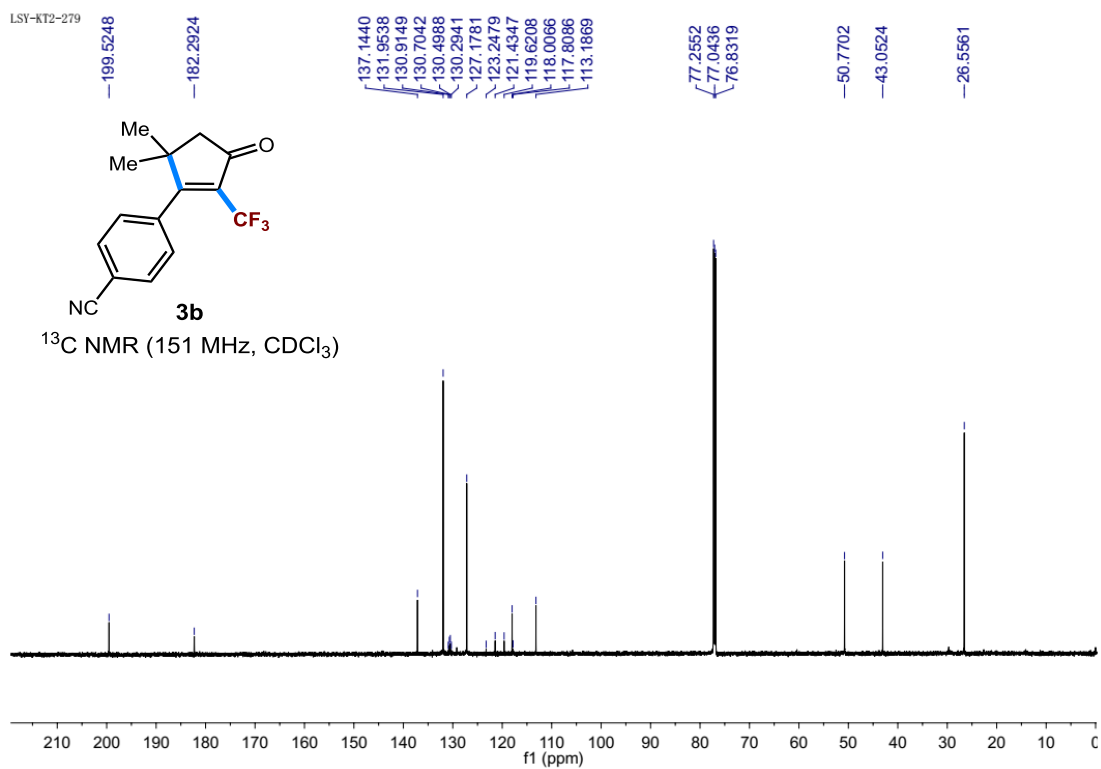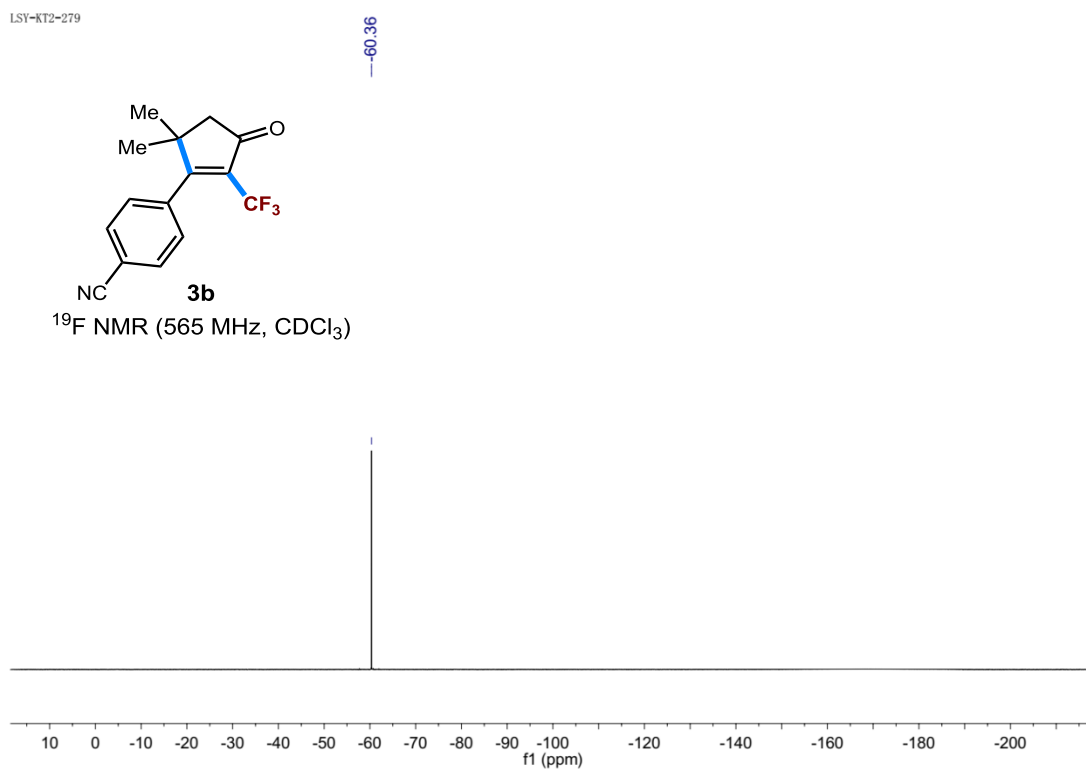

LSY-KT2-249

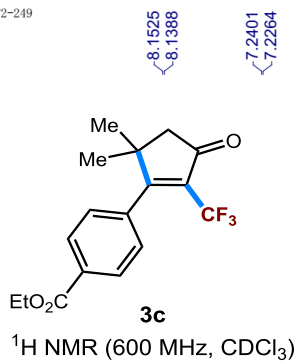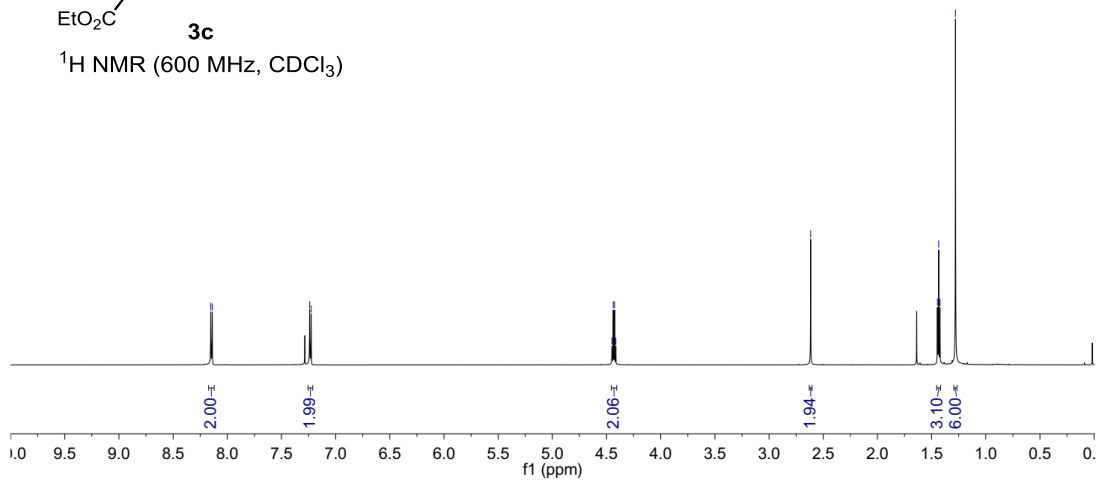

LSY-KT2-249

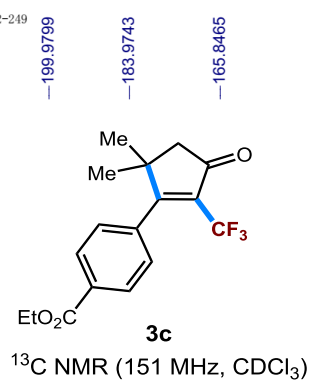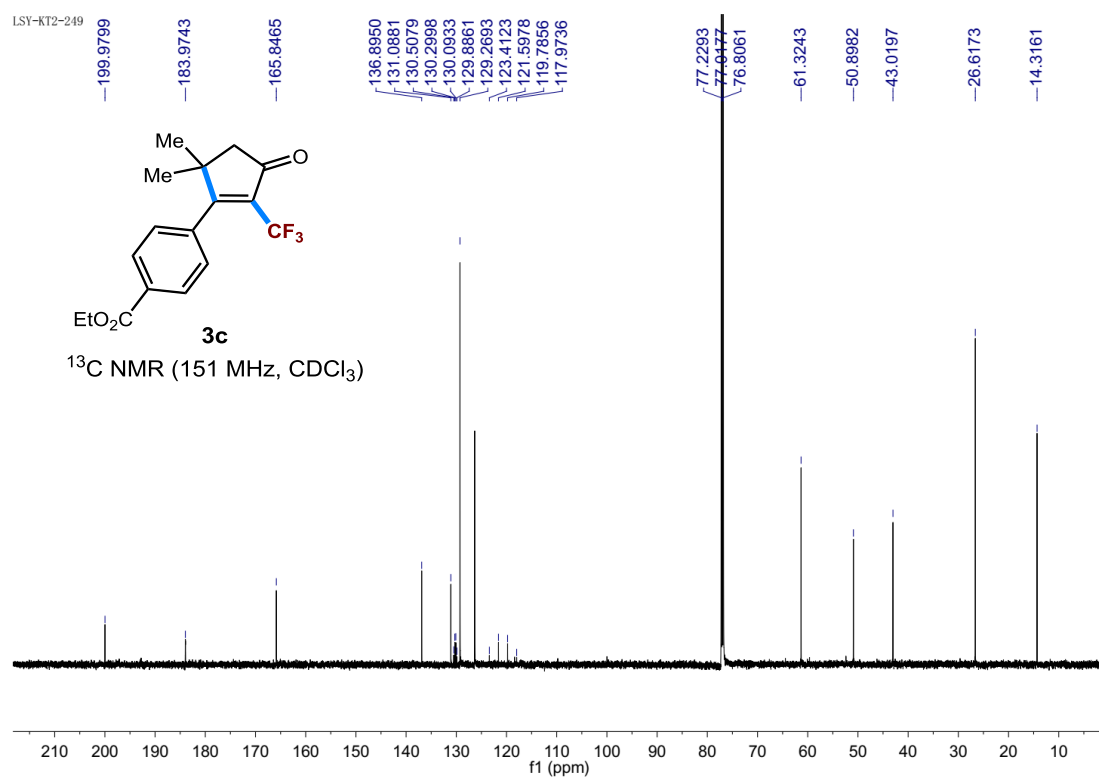

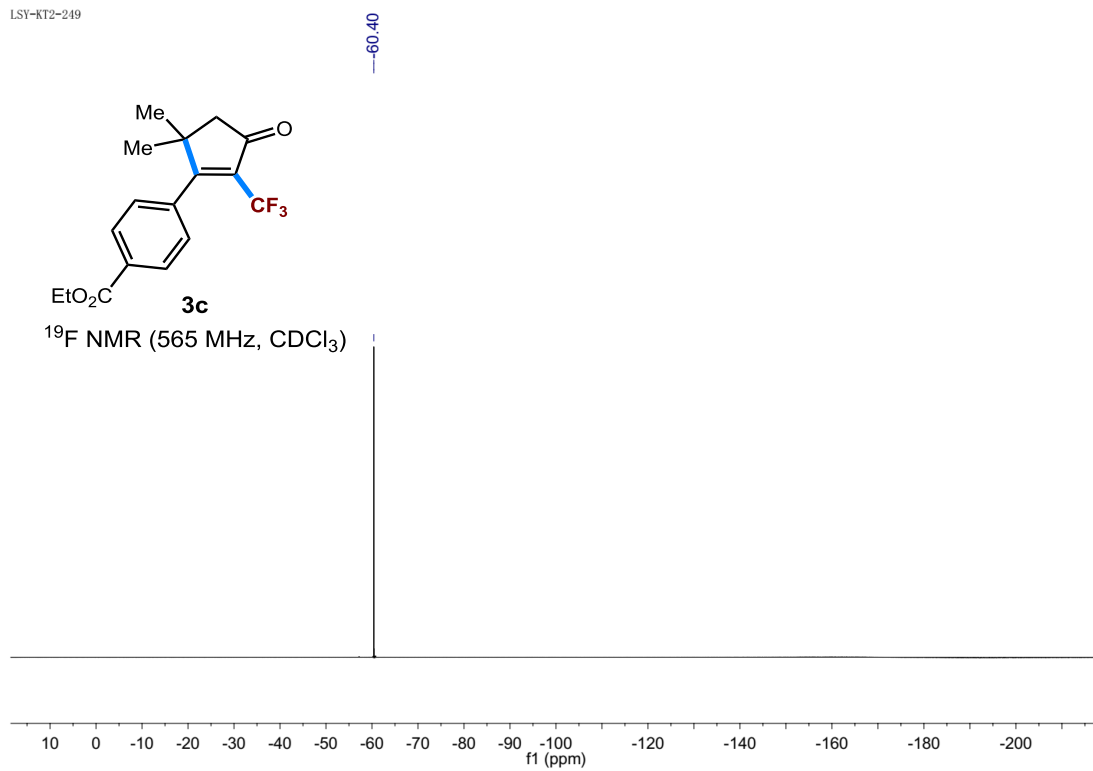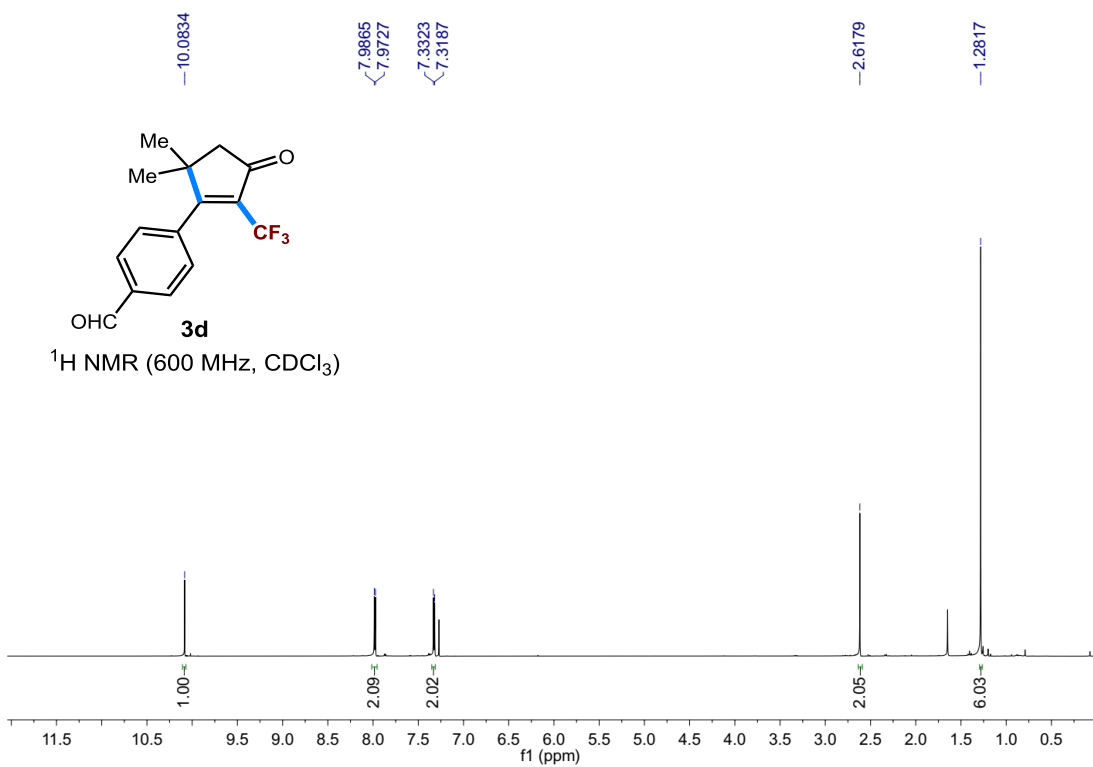

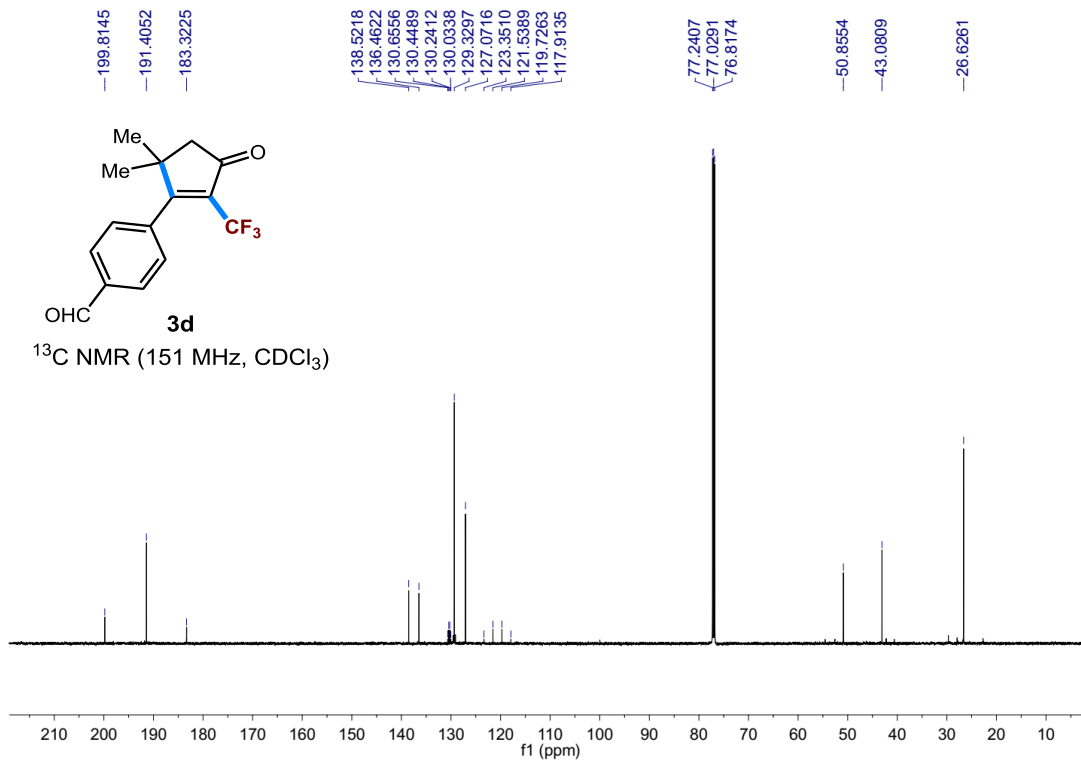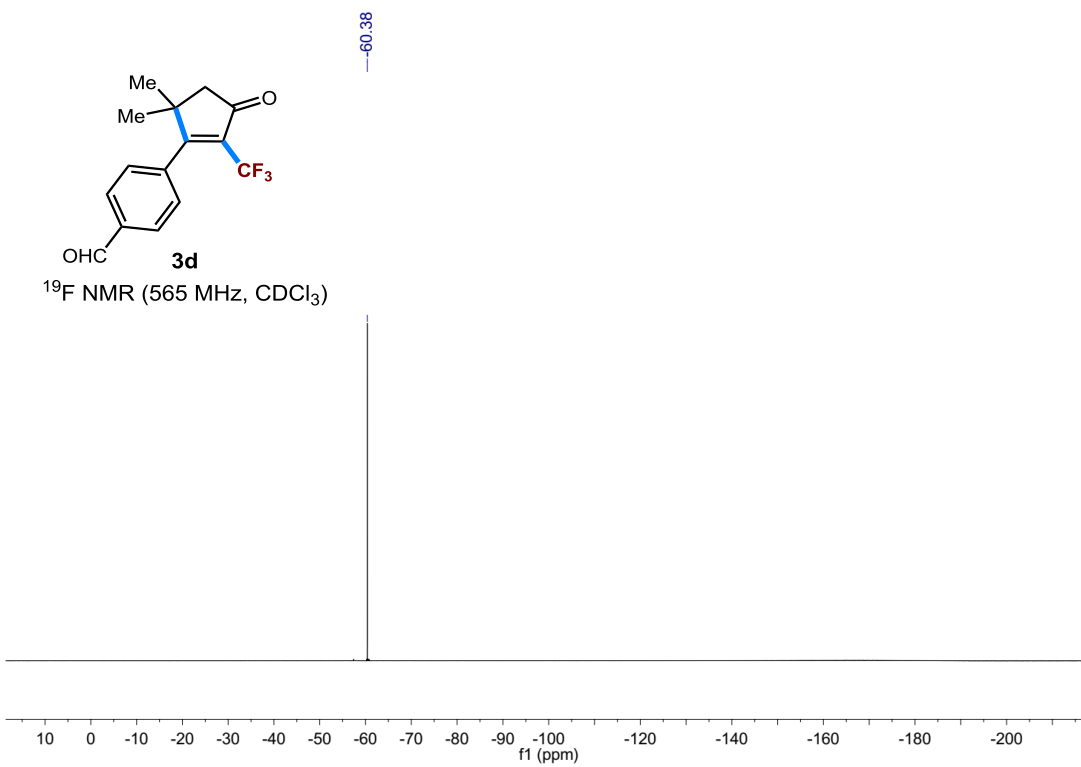

LSY-KT2-215

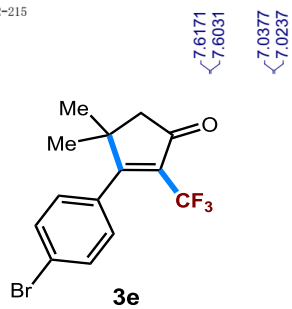

<sup>1</sup>H NMR (600 MHz, CDCl<sub>3</sub>)

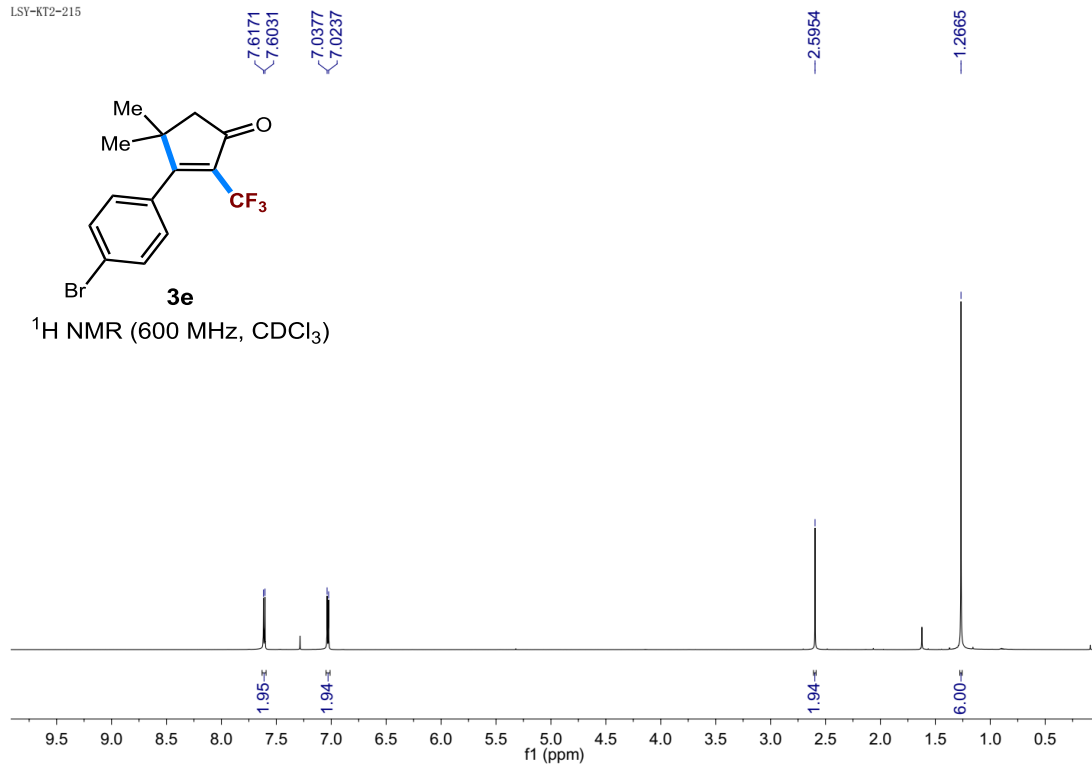

LSY-KT2-215

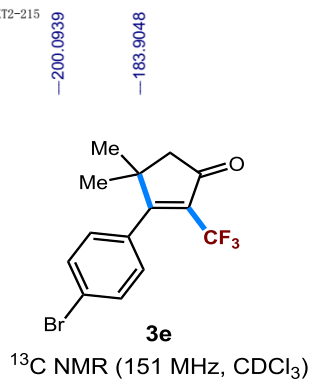

<sup>13</sup>C NMR (151 MHz, CDCl<sub>3</sub>)

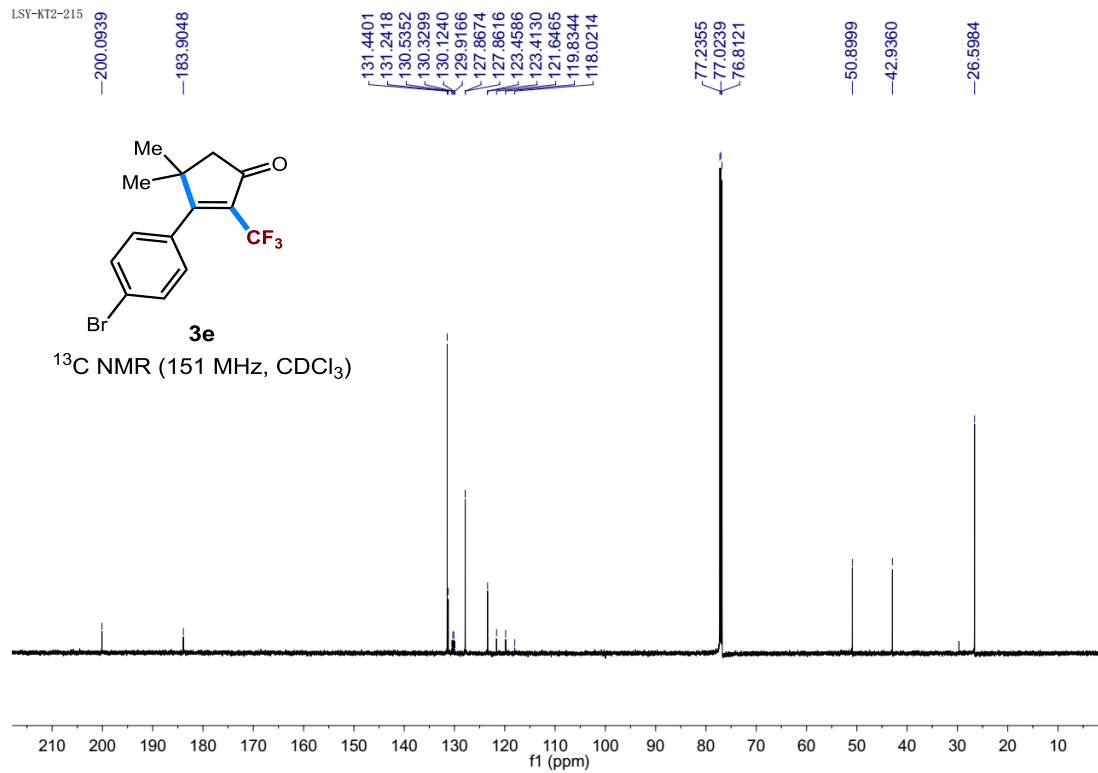

LSY-KT2-215

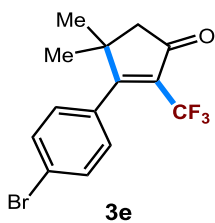

$^{19}\text{F}$  NMR (565 MHz,  $\text{CDCl}_3$ )

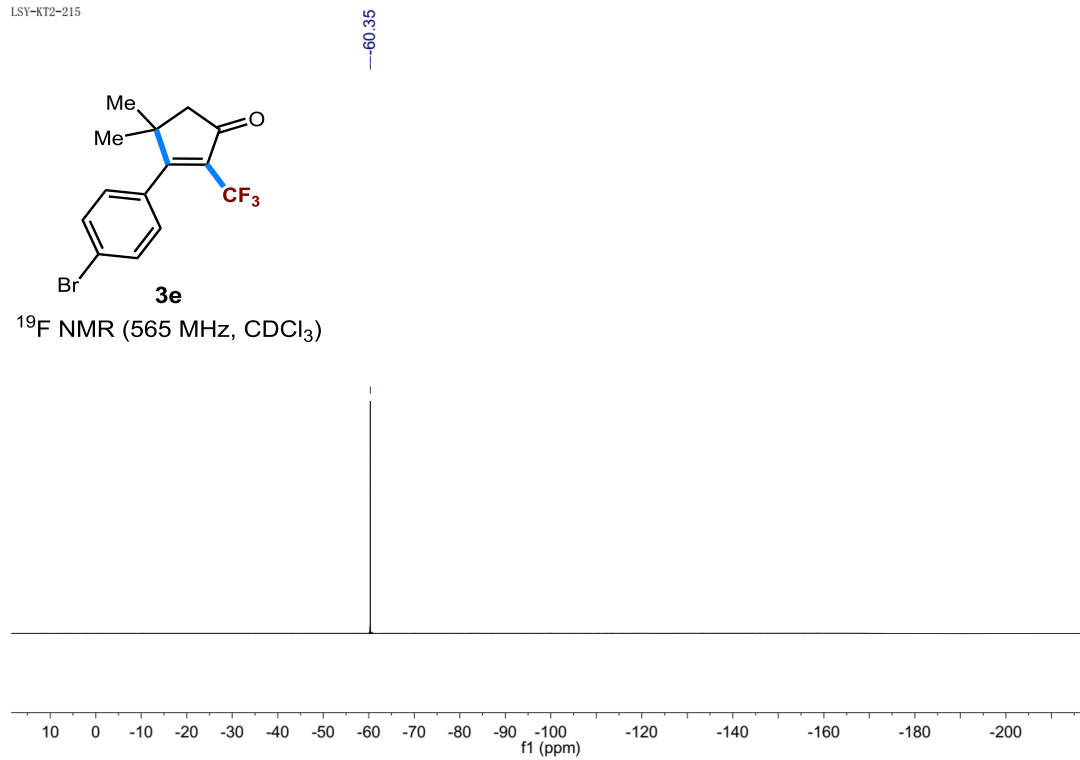

LSY-KT2-214

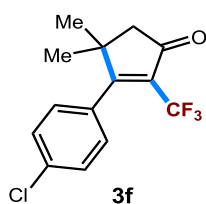

$^1\text{H}$  NMR (600 MHz,  $\text{CDCl}_3$ )

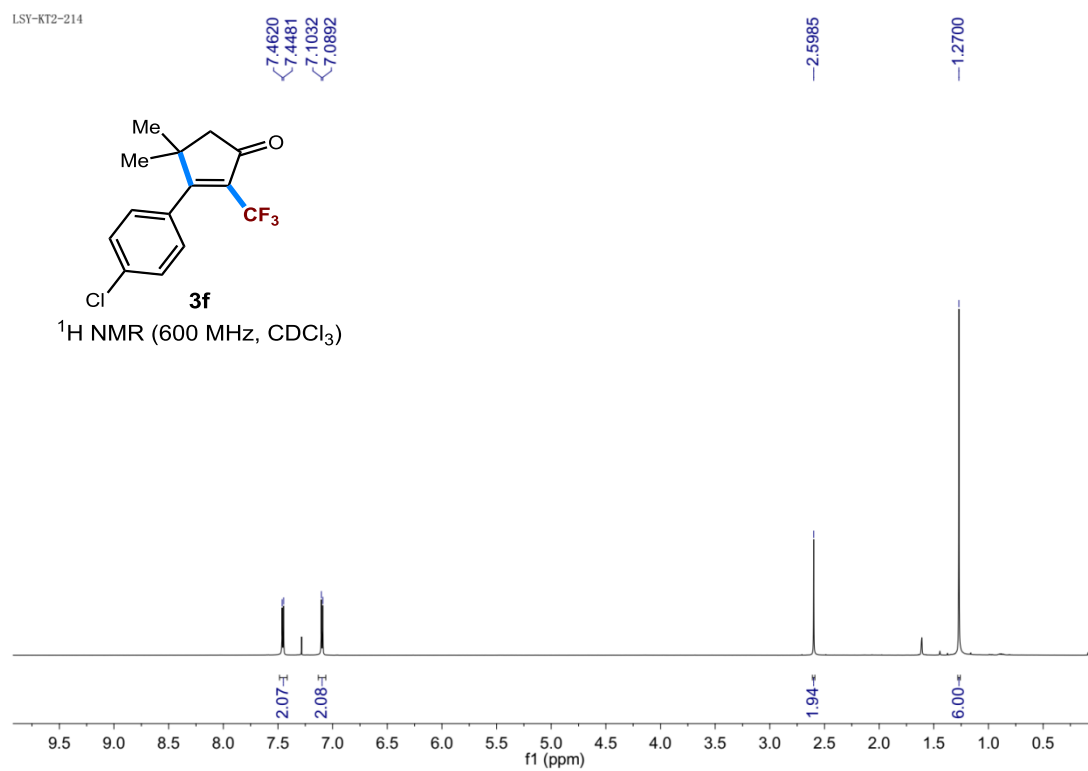

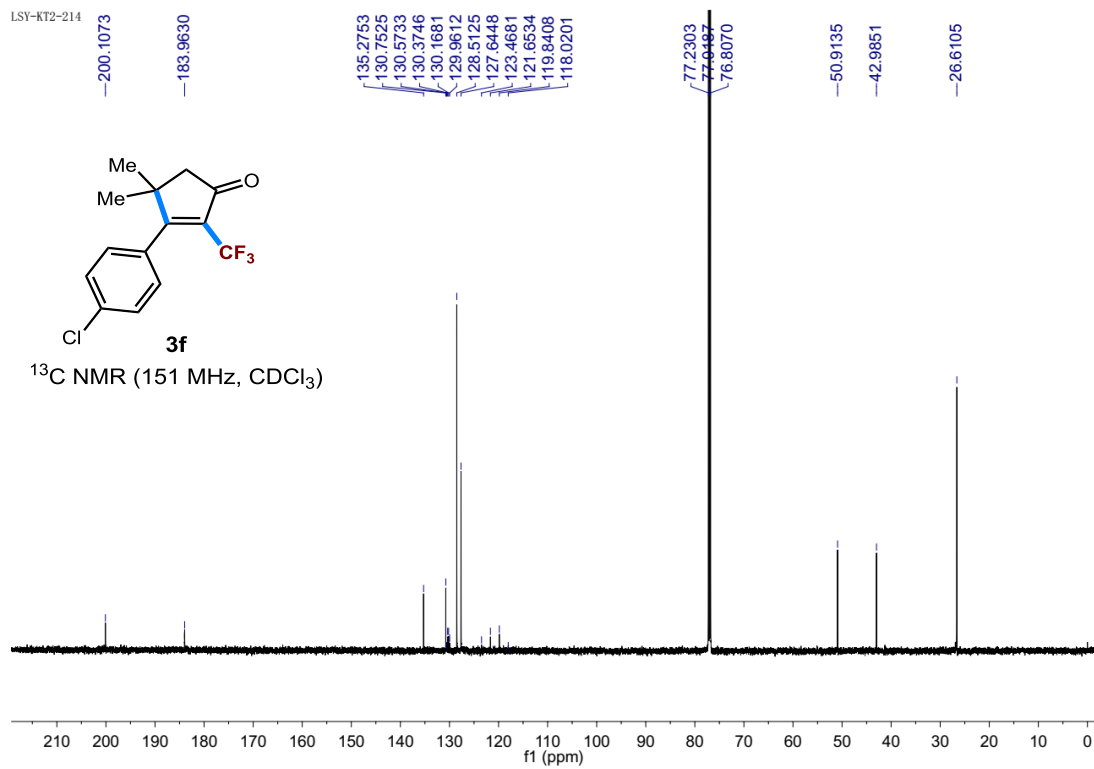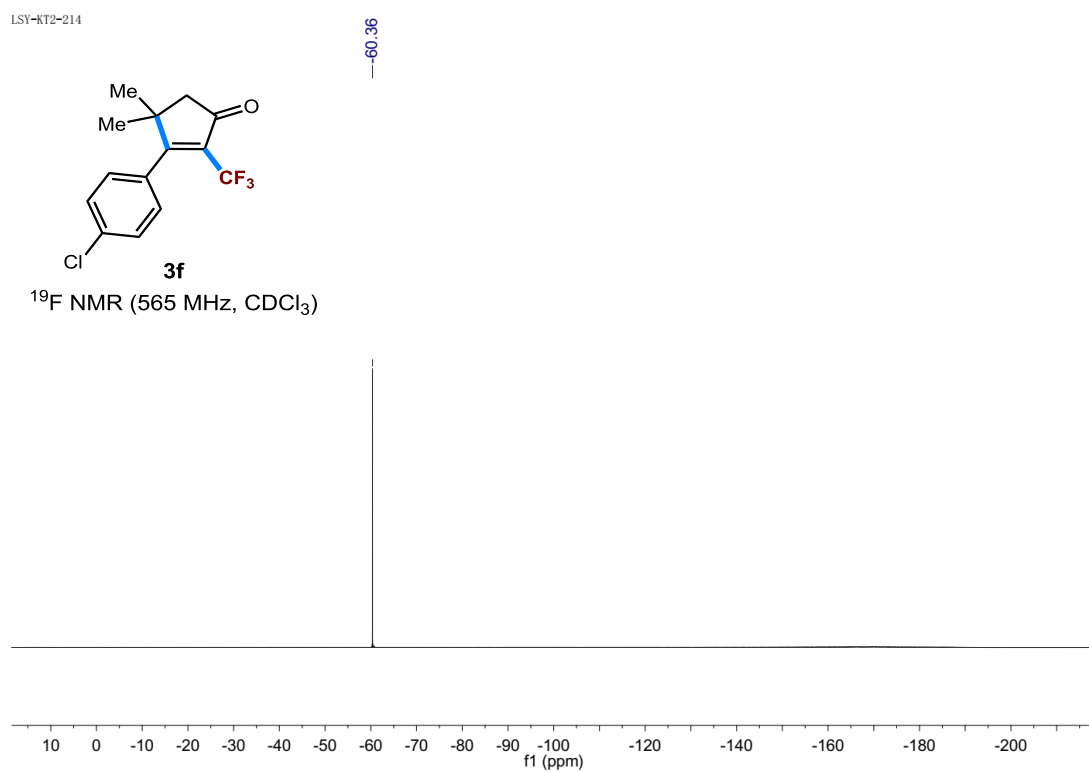

LSY-KT2-213

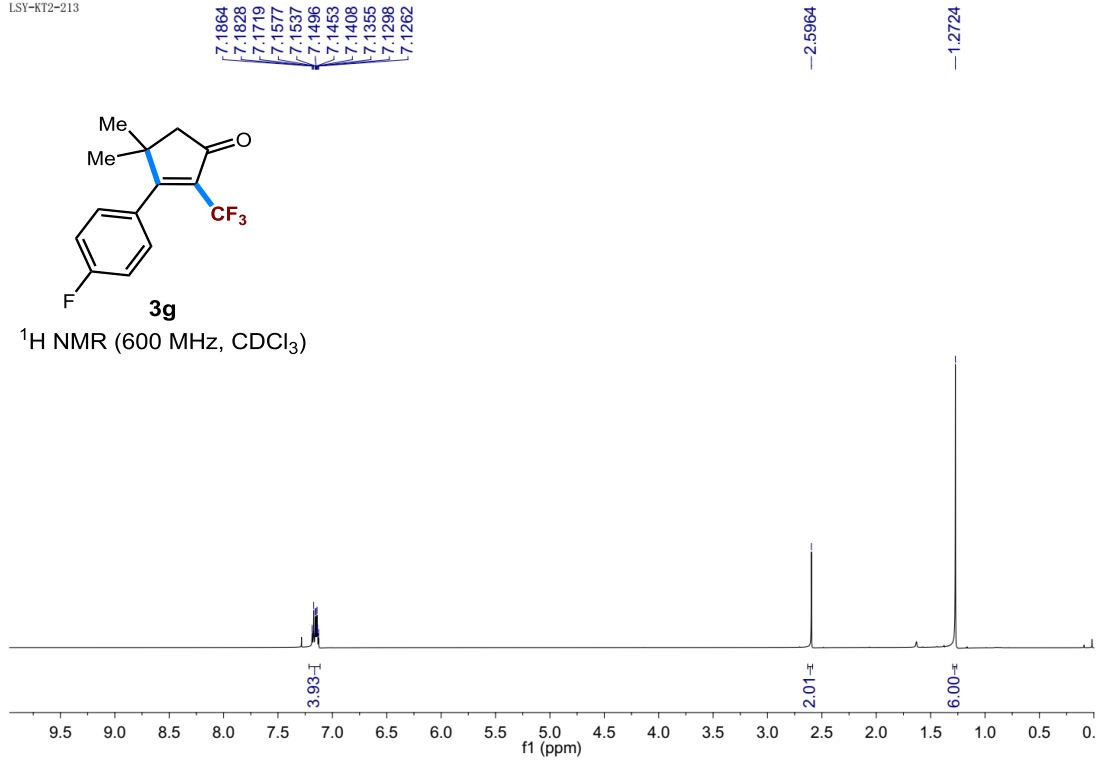

LSY-KT2-213

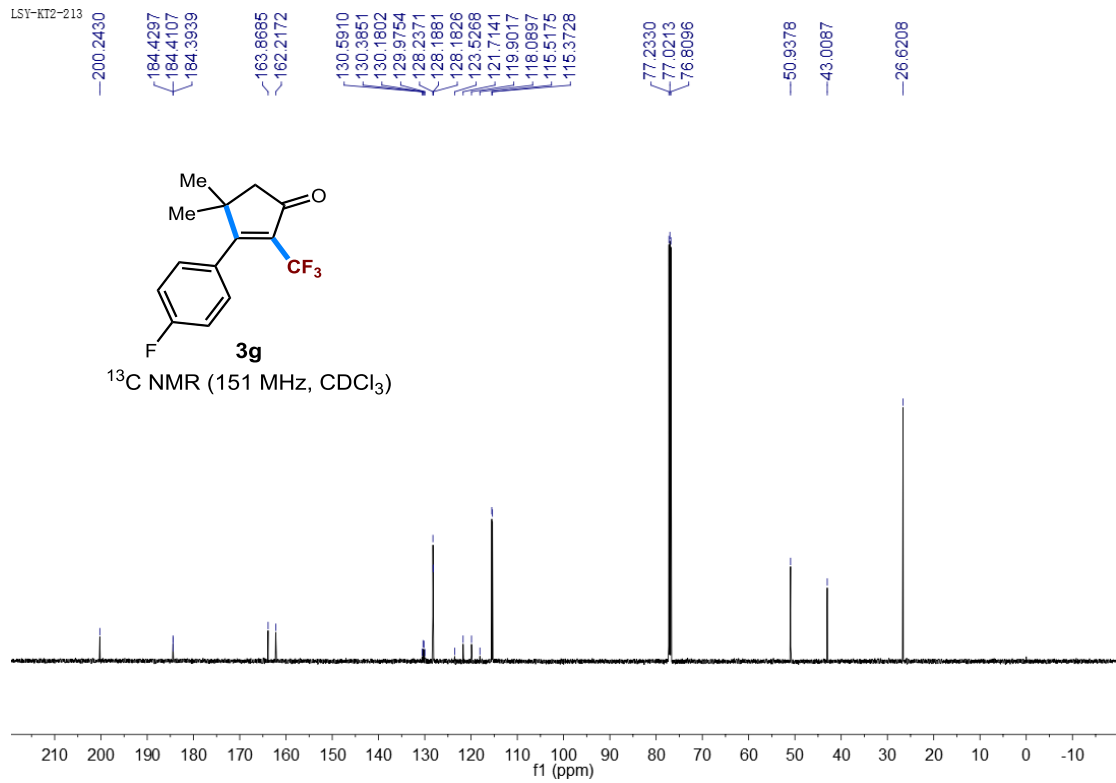



LSY-KT2-213

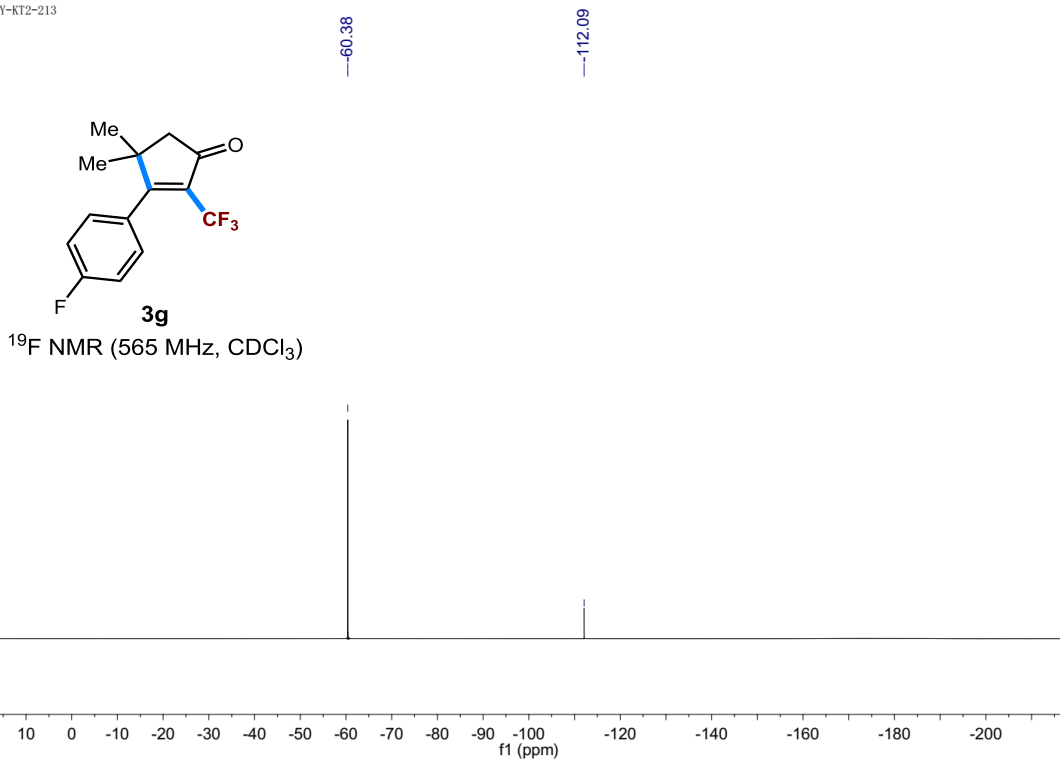

LSY-KT2-212

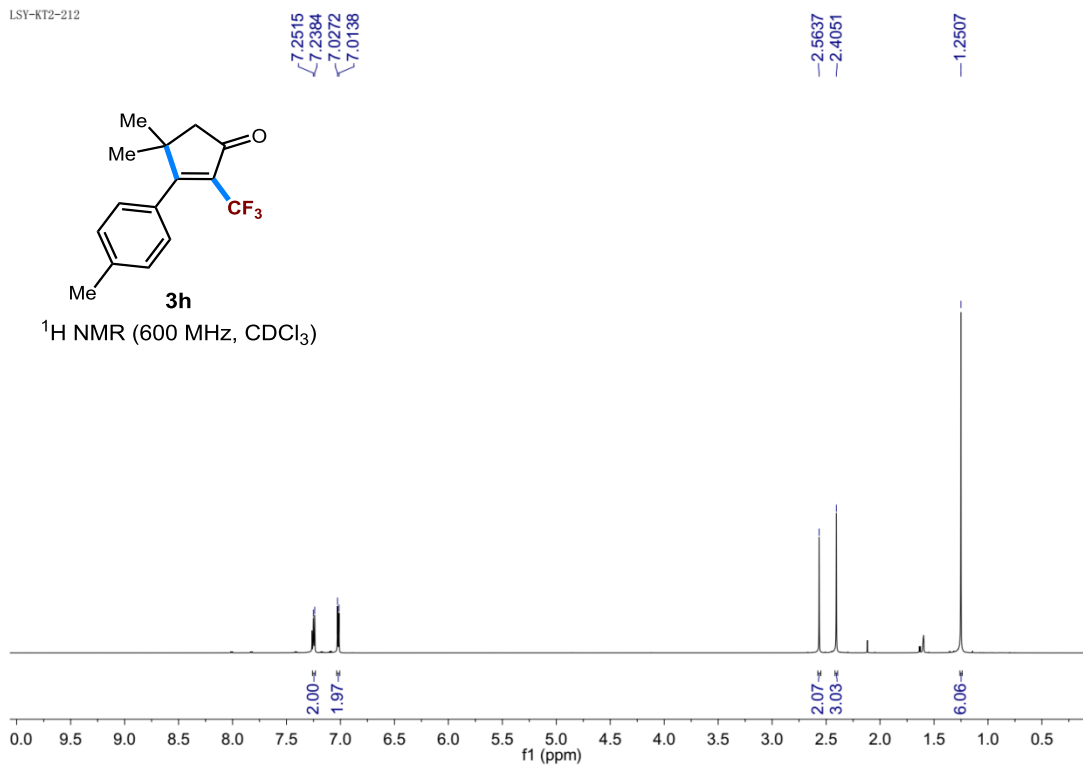

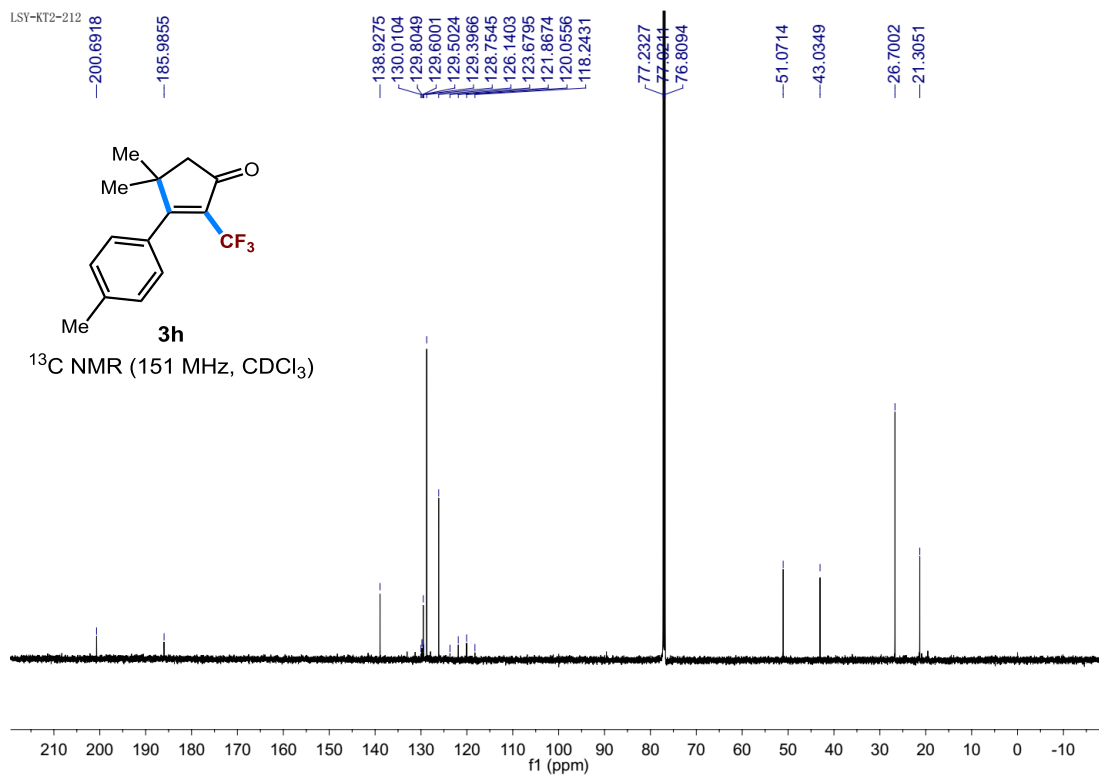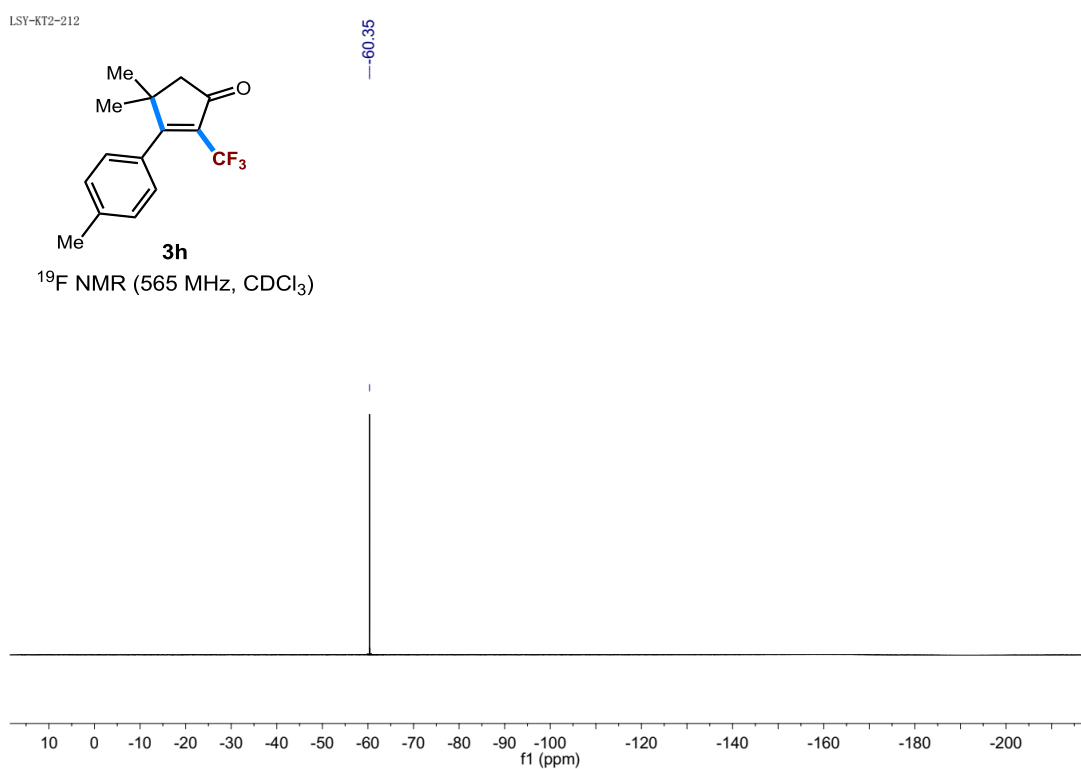

LSY-KT2-188-B

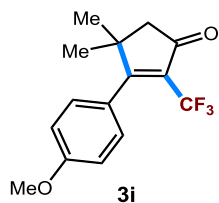

<sup>1</sup>H NMR (600 MHz, CDCl<sub>3</sub>)

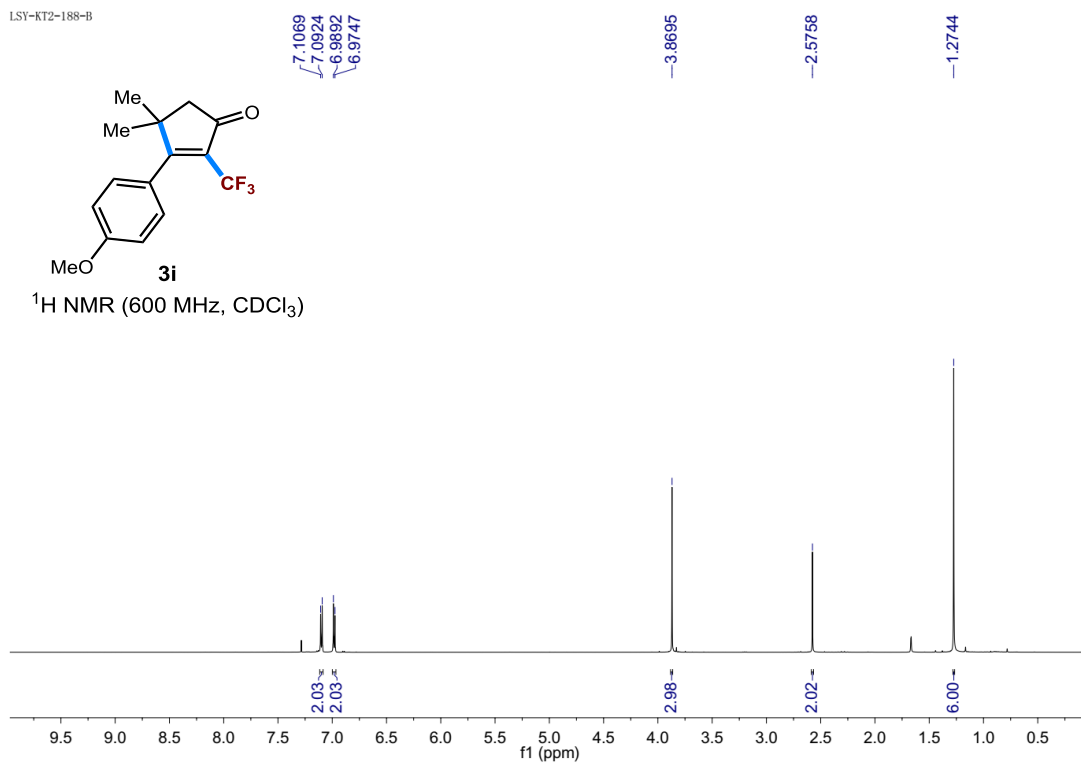

LSY-KT2-188-B

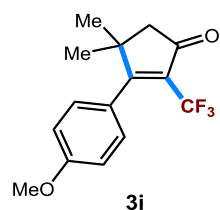

<sup>13</sup>C NMR (151 MHz, CDCl<sub>3</sub>)

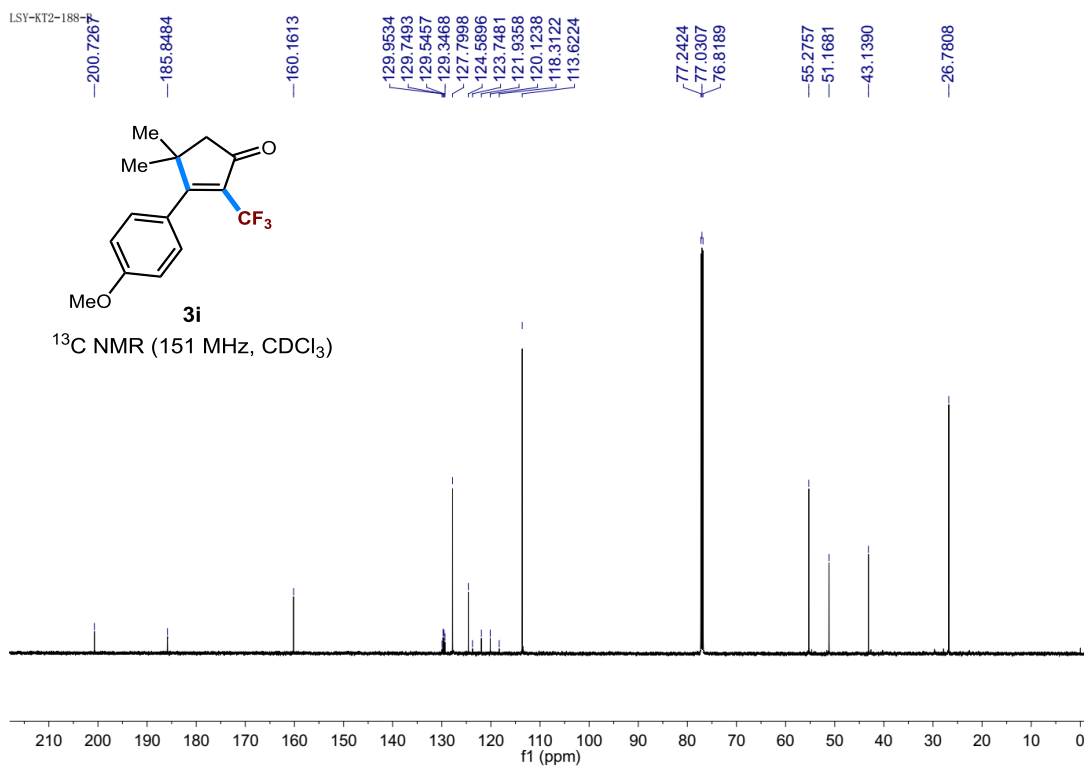

LSY-KT2-188-B

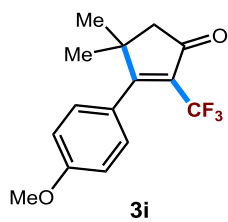

$^{19}\text{F}$  NMR (565 MHz,  $\text{CDCl}_3$ )

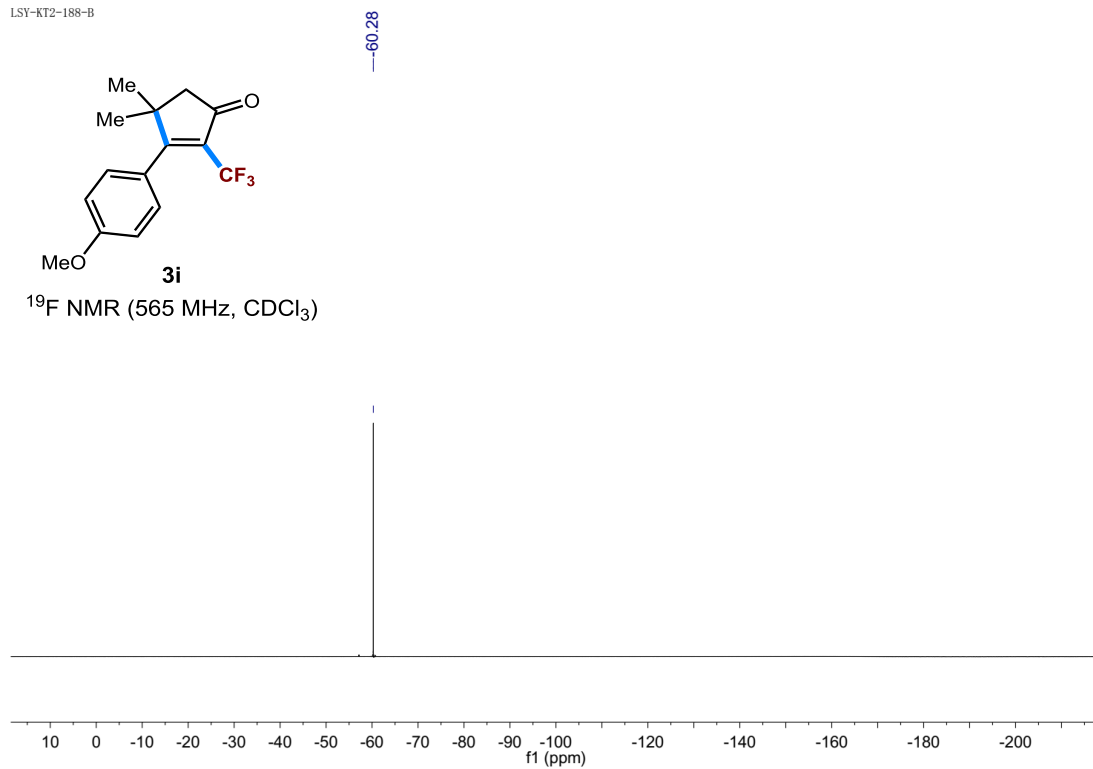

LSY-KT2-256

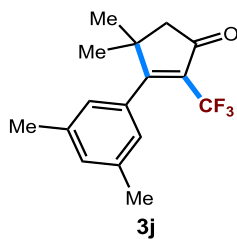

$^1\text{H}$  NMR (600 MHz,  $\text{CDCl}_3$ )

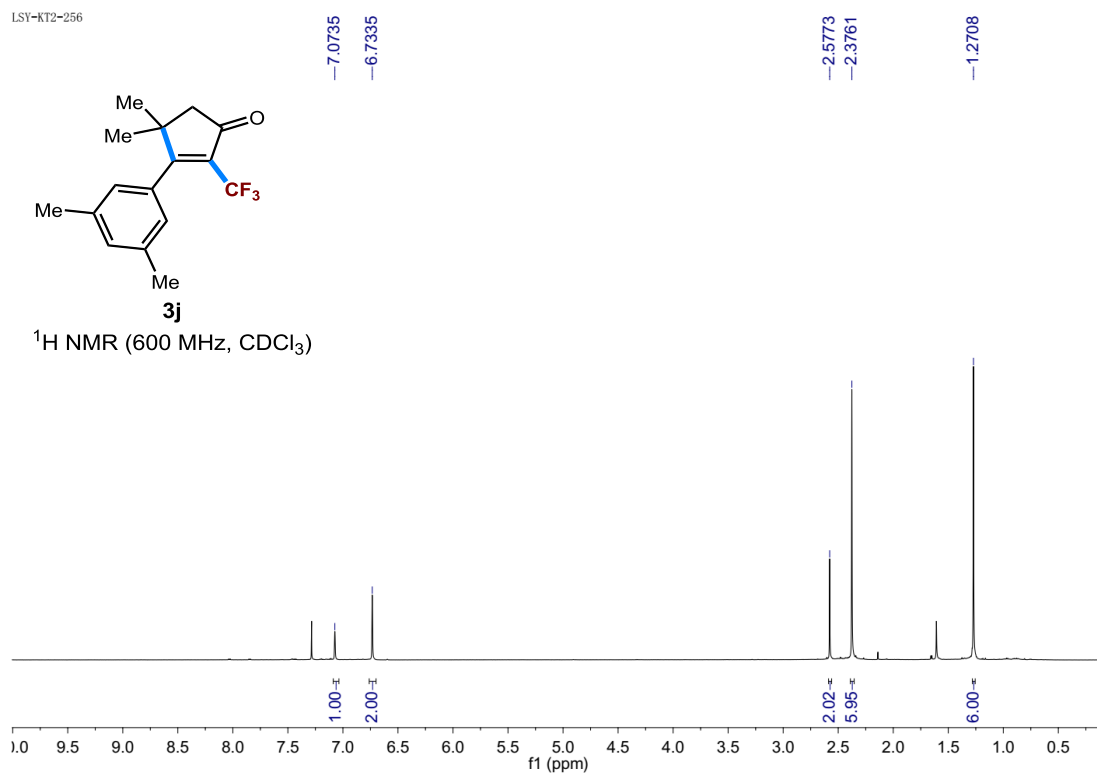

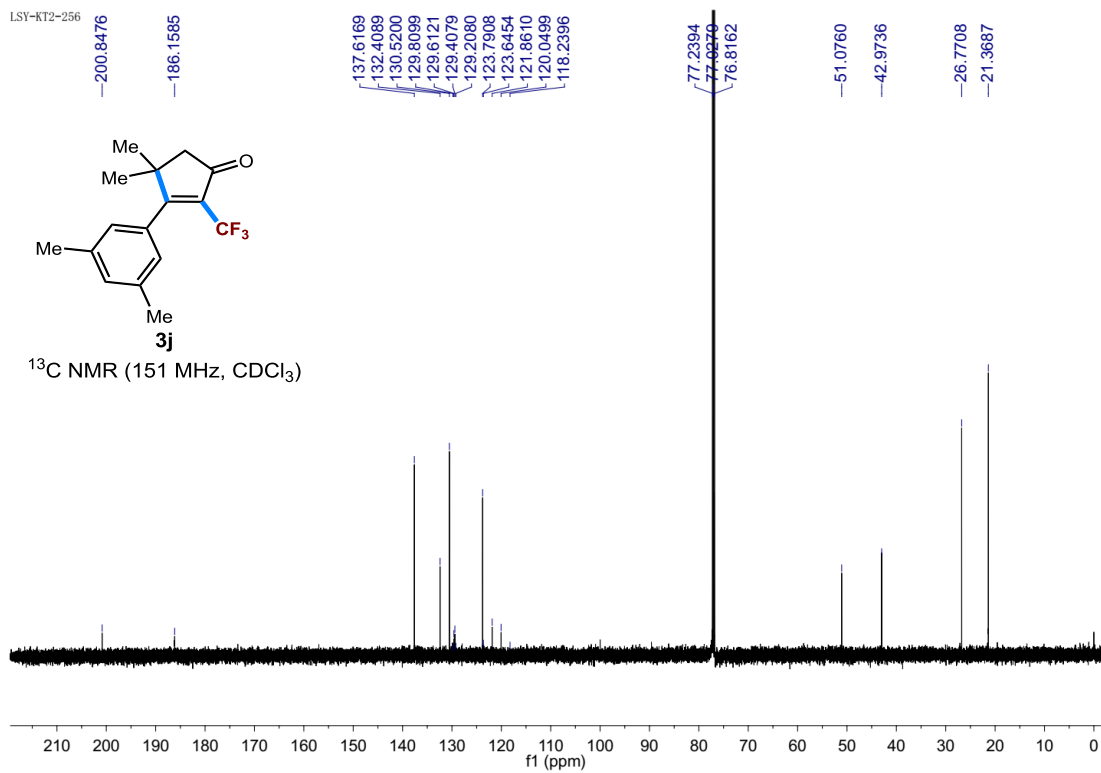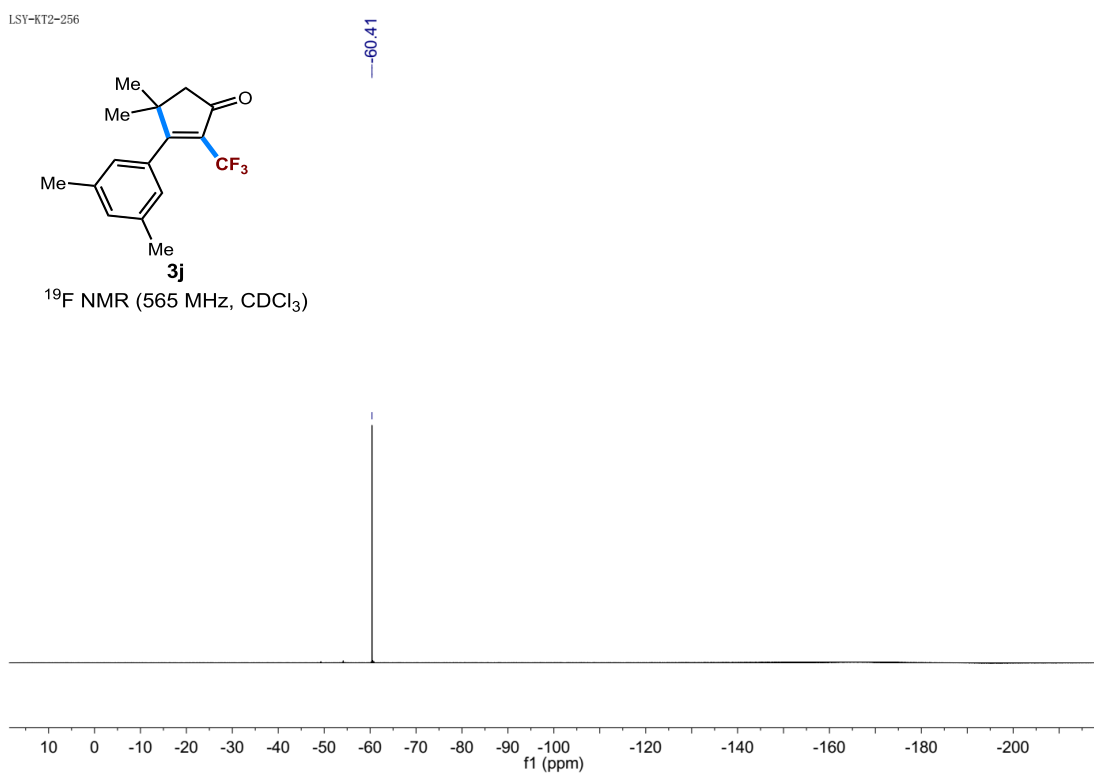

LSY-KT2-281

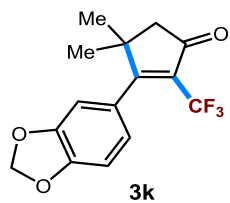

<sup>1</sup>H NMR (600 MHz, CDCl<sub>3</sub>)

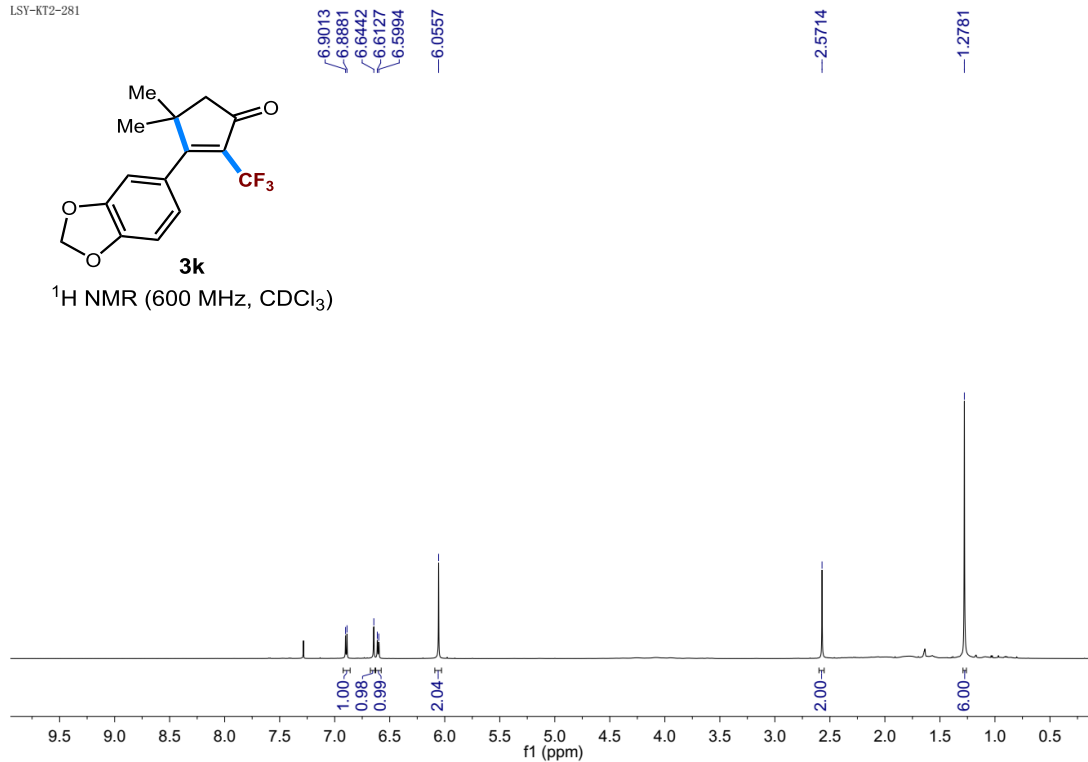

LSY-KT2-281

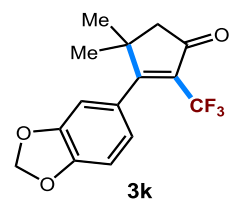

<sup>13</sup>C NMR (151 MHz, CDCl<sub>3</sub>)

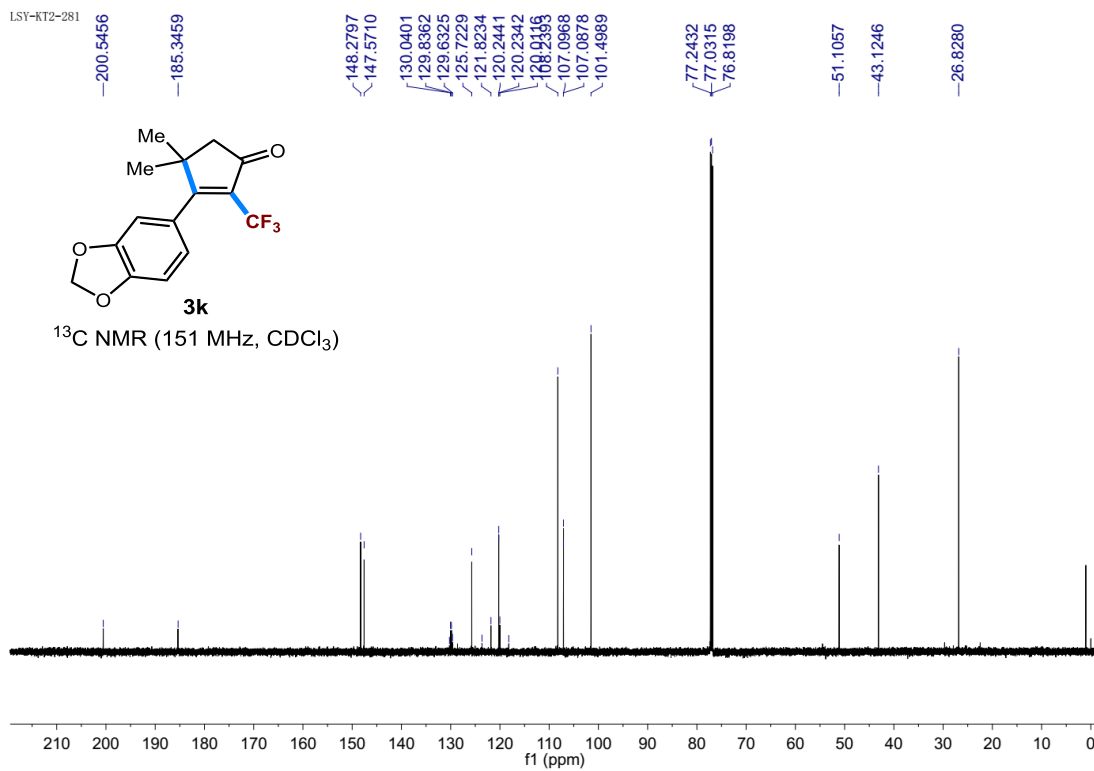

LSY-KT2-281

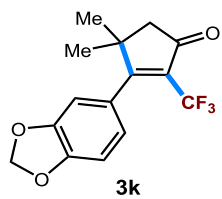

$^{19}\text{F}$  NMR (565 MHz,  $\text{CDCl}_3$ )

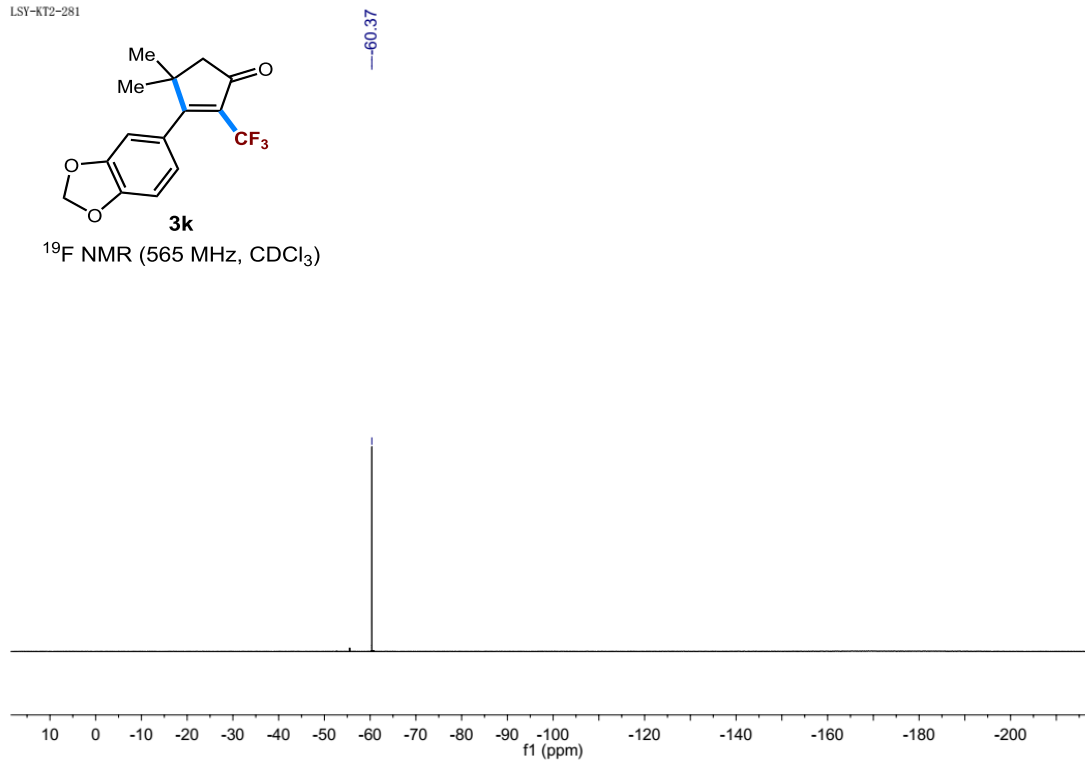

LSY-KT2-250

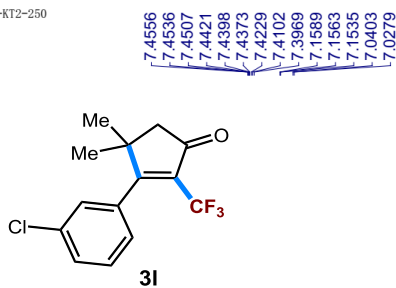

$^1\text{H}$  NMR (600 MHz,  $\text{CDCl}_3$ )

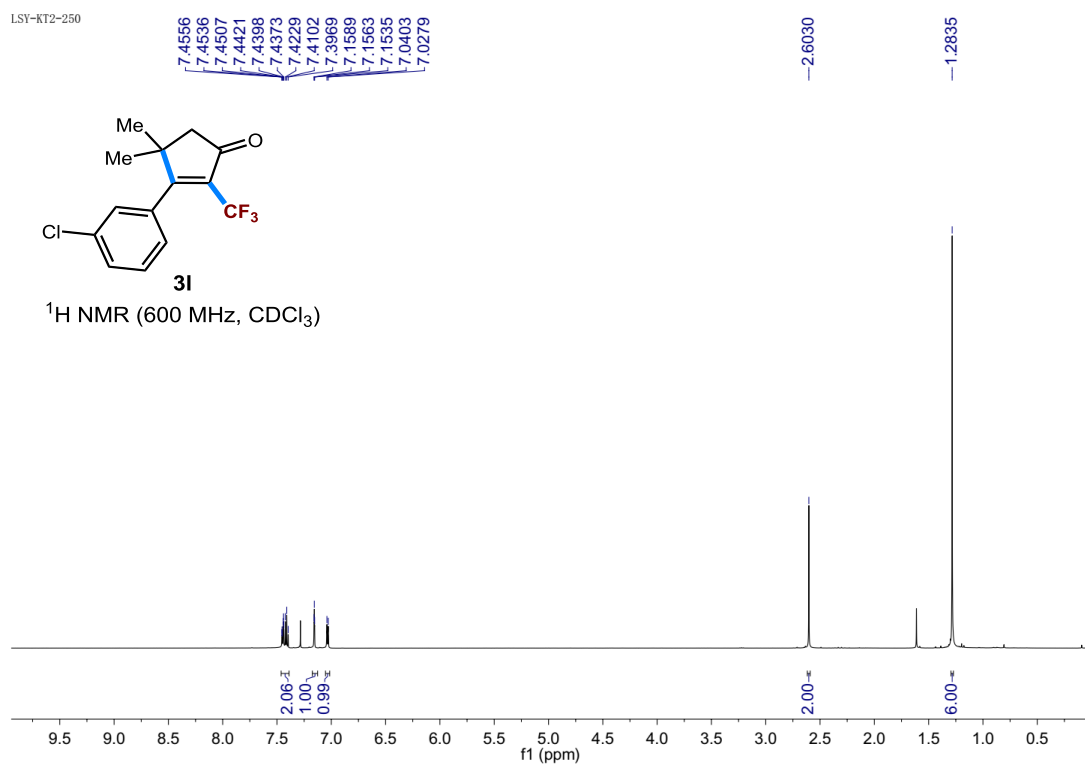

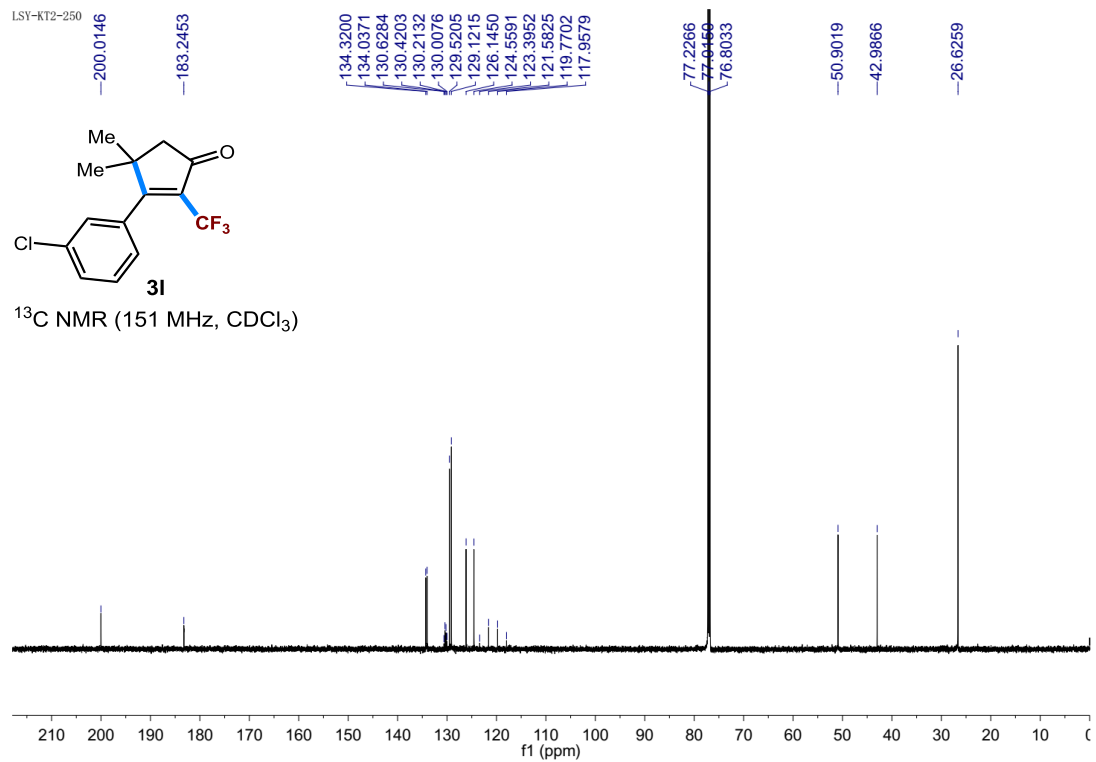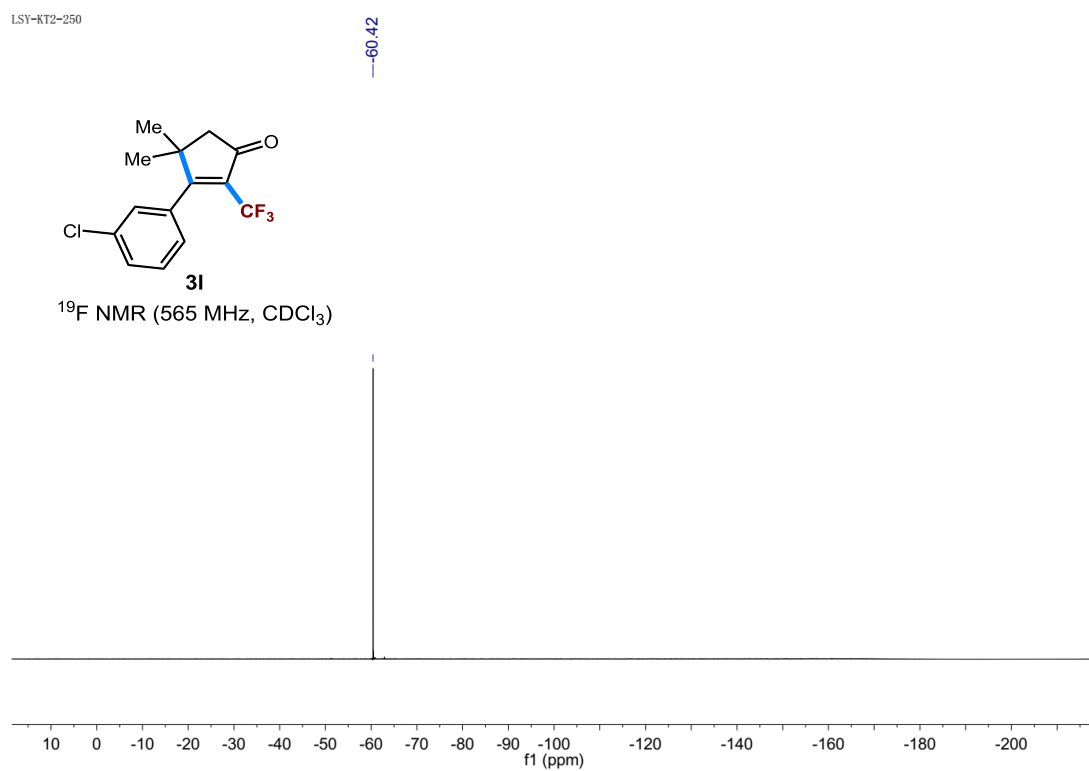



LSY-KT2-261

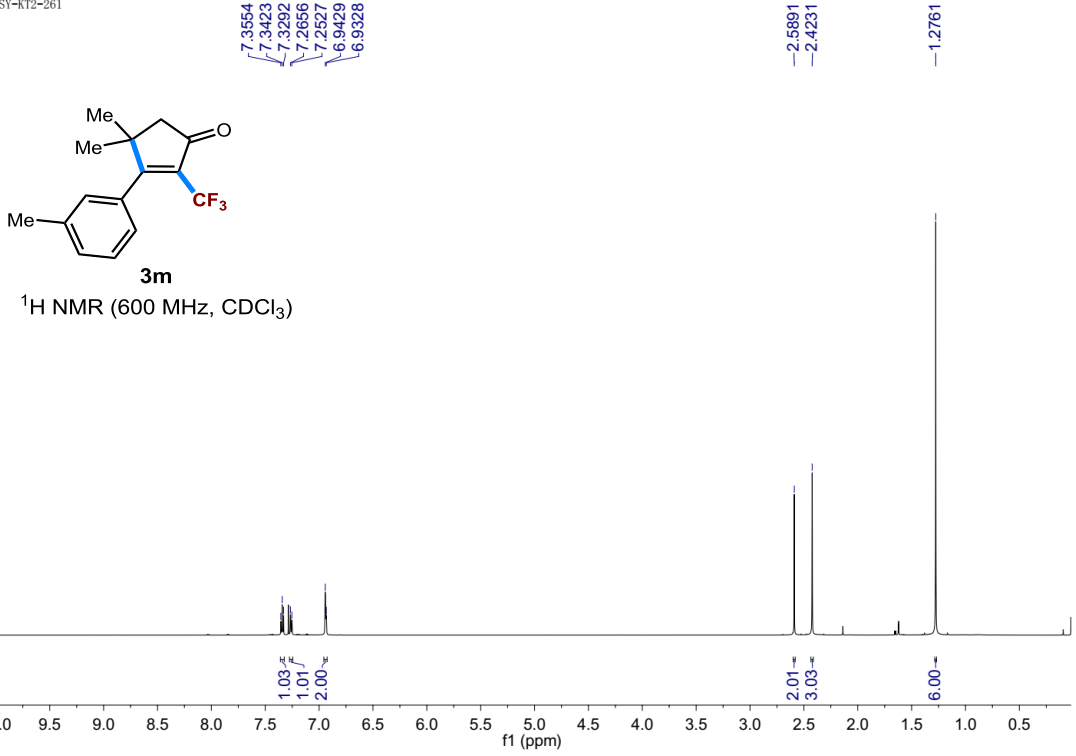

LSY-KT2-261

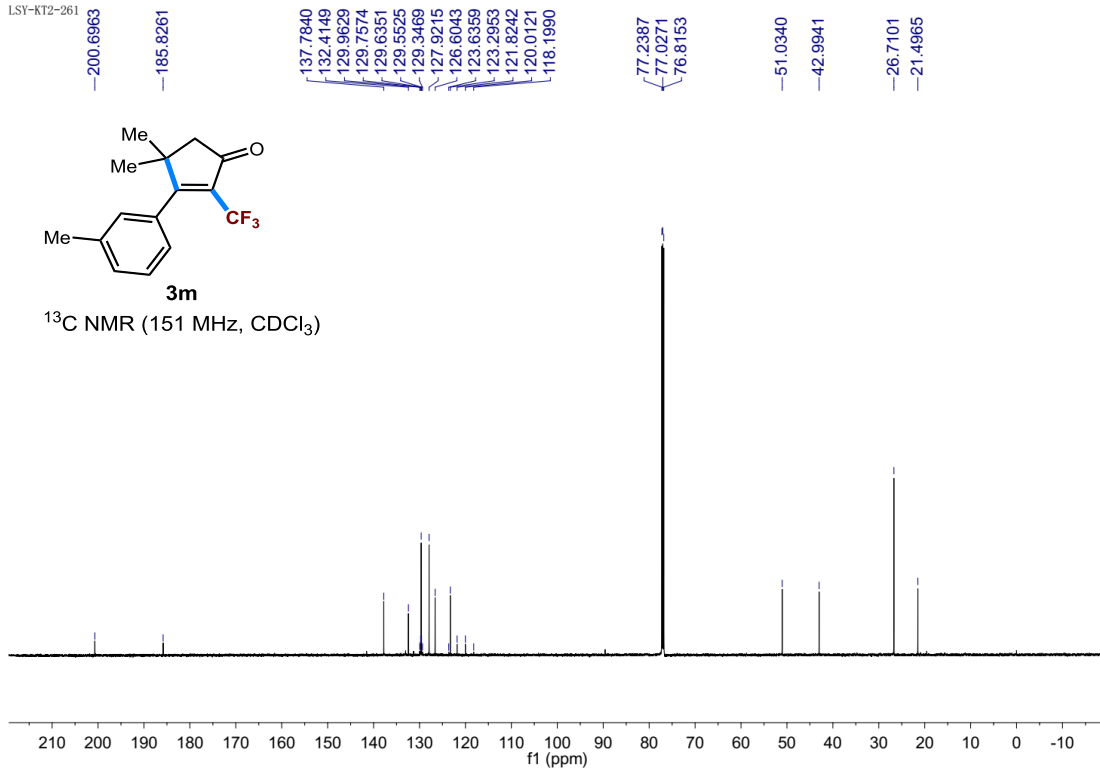

LSY-KT2-243

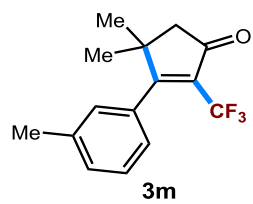

$^{19}\text{F}$  NMR (565 MHz,  $\text{CDCl}_3$ )

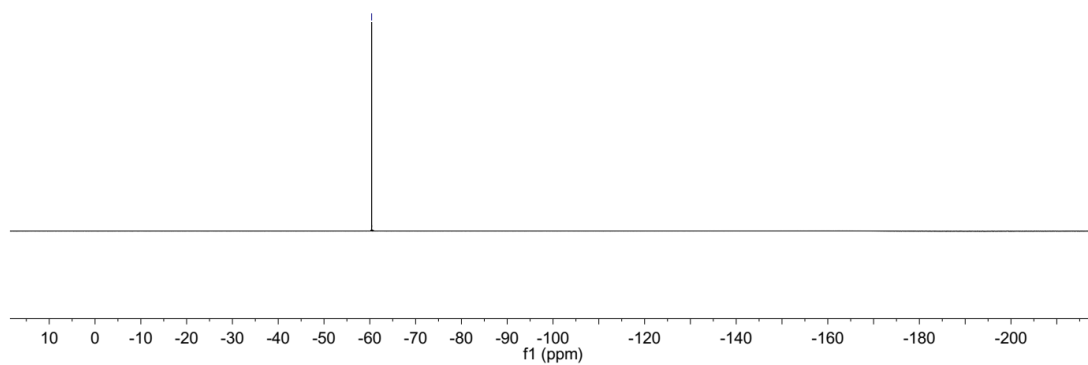

LSY-KT2-189-B

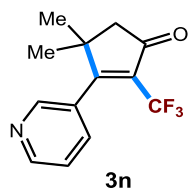

$^1\text{H}$  NMR (600 MHz,  $\text{CDCl}_3$ )

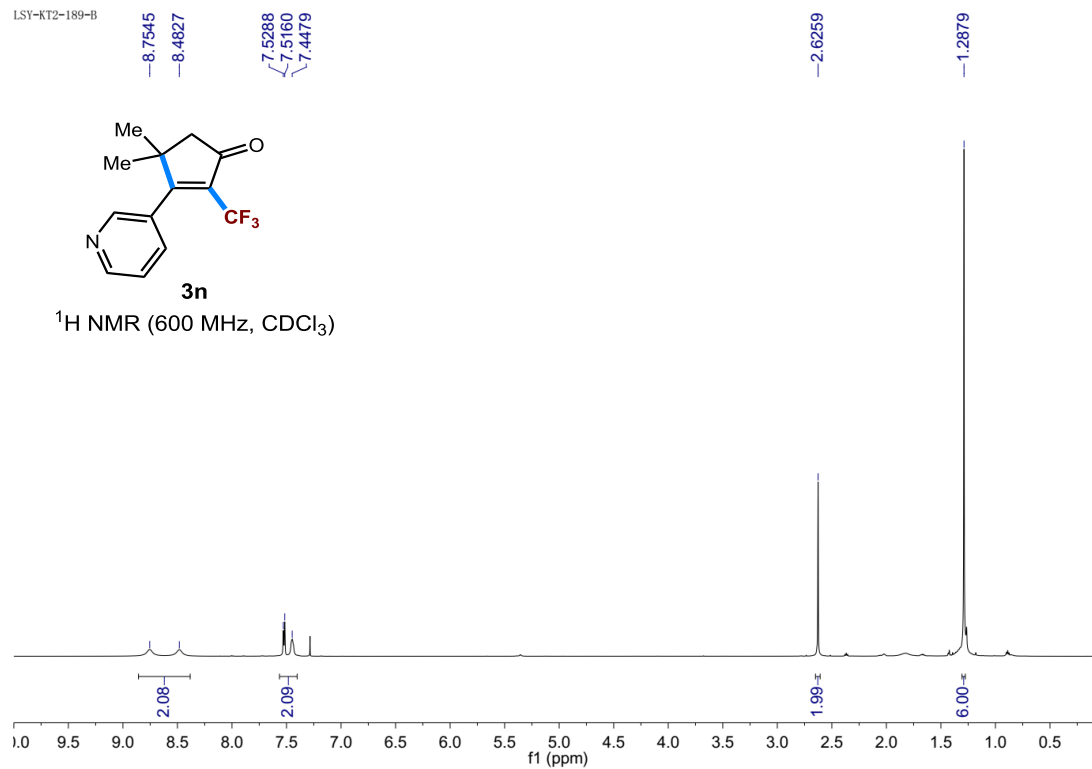

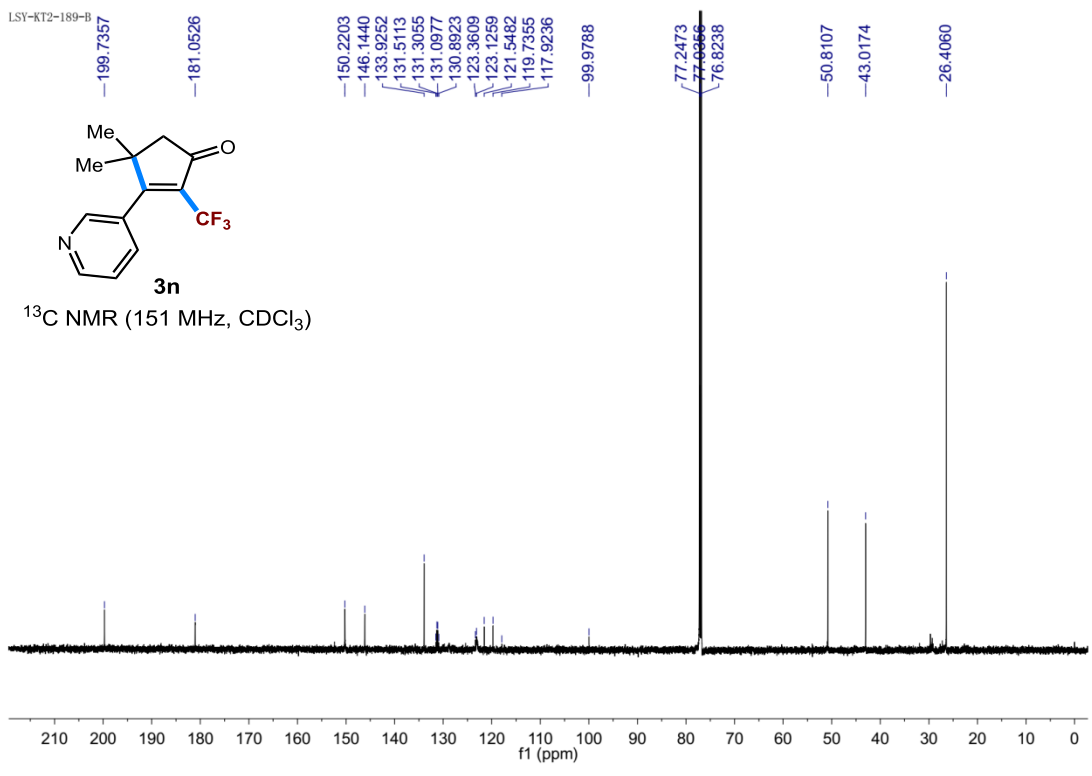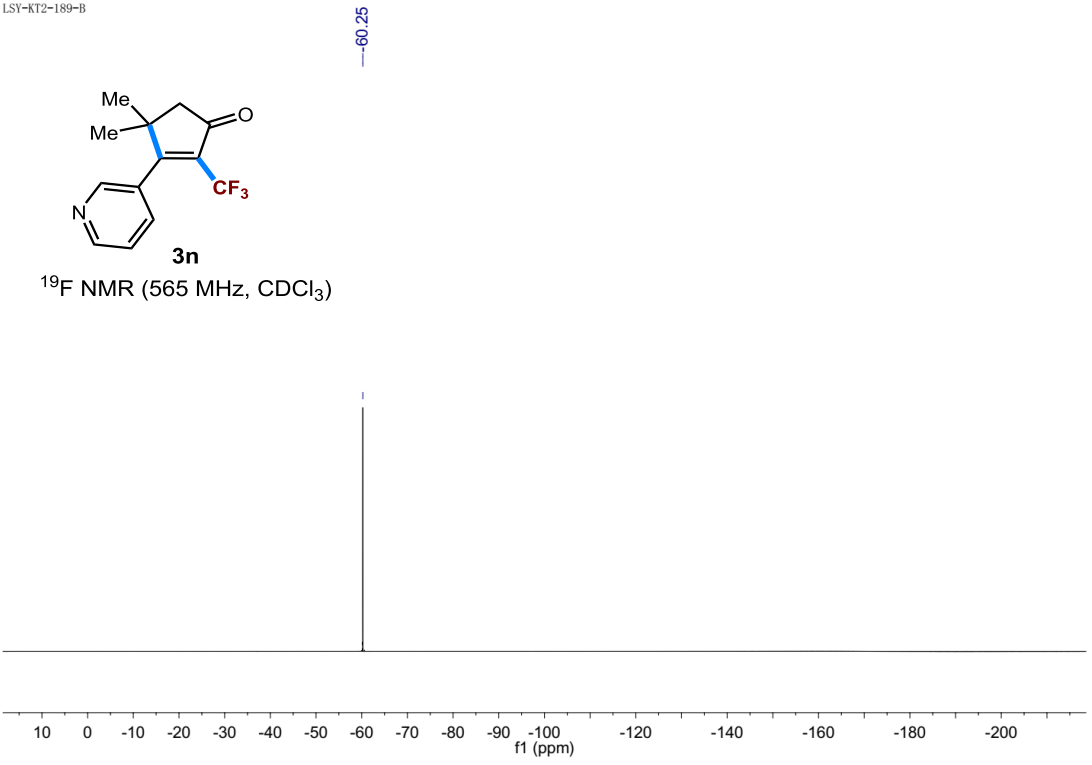

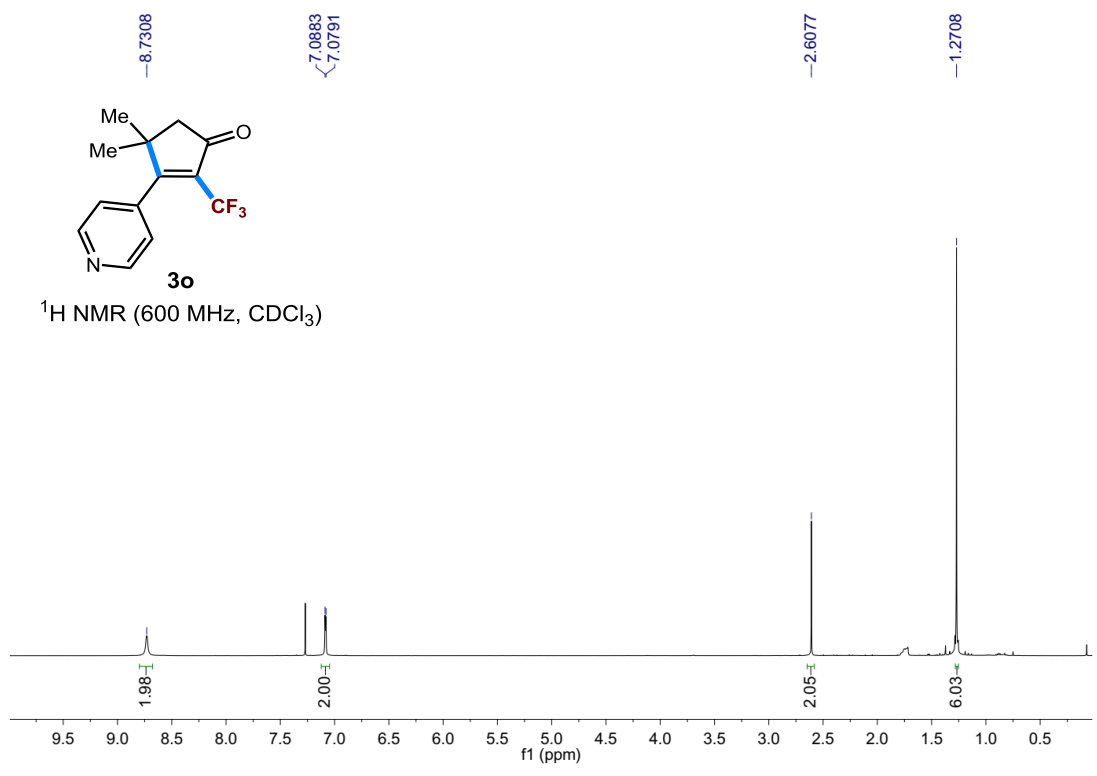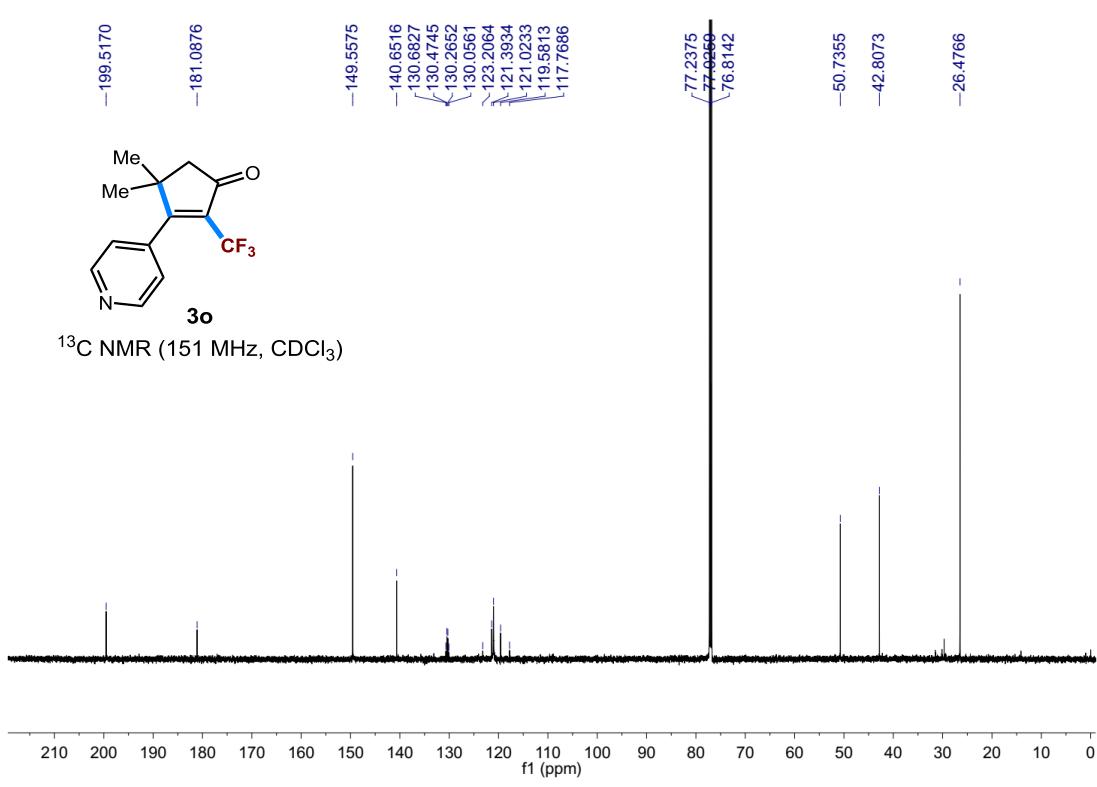

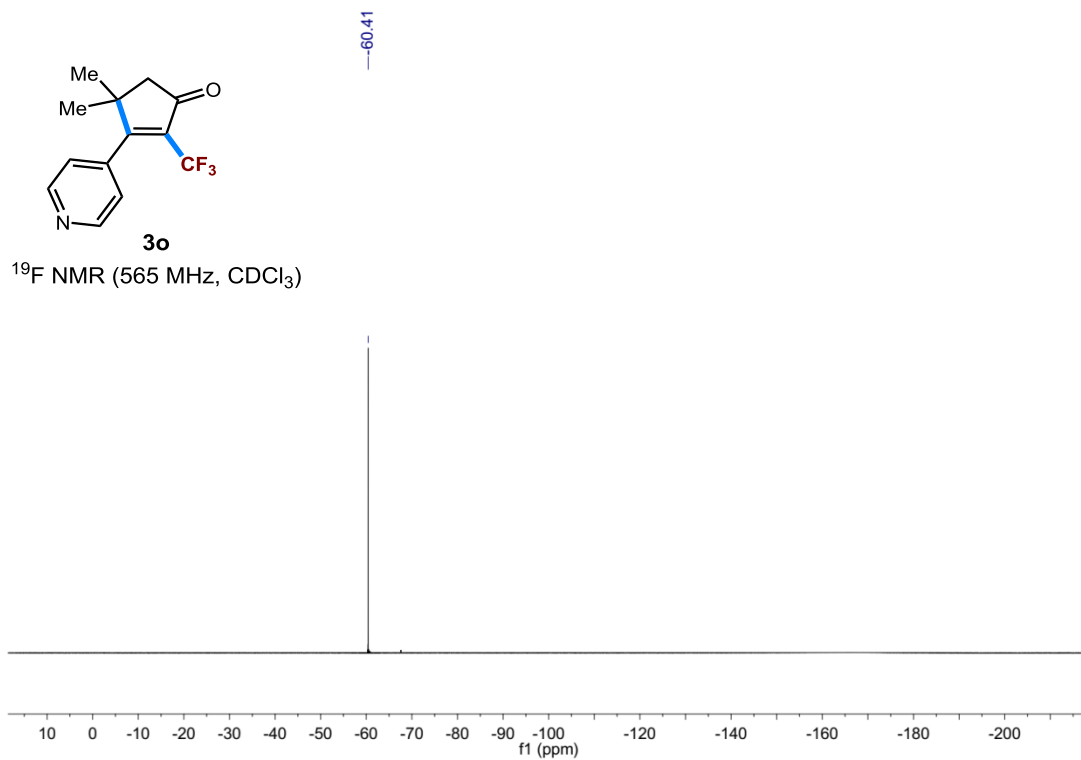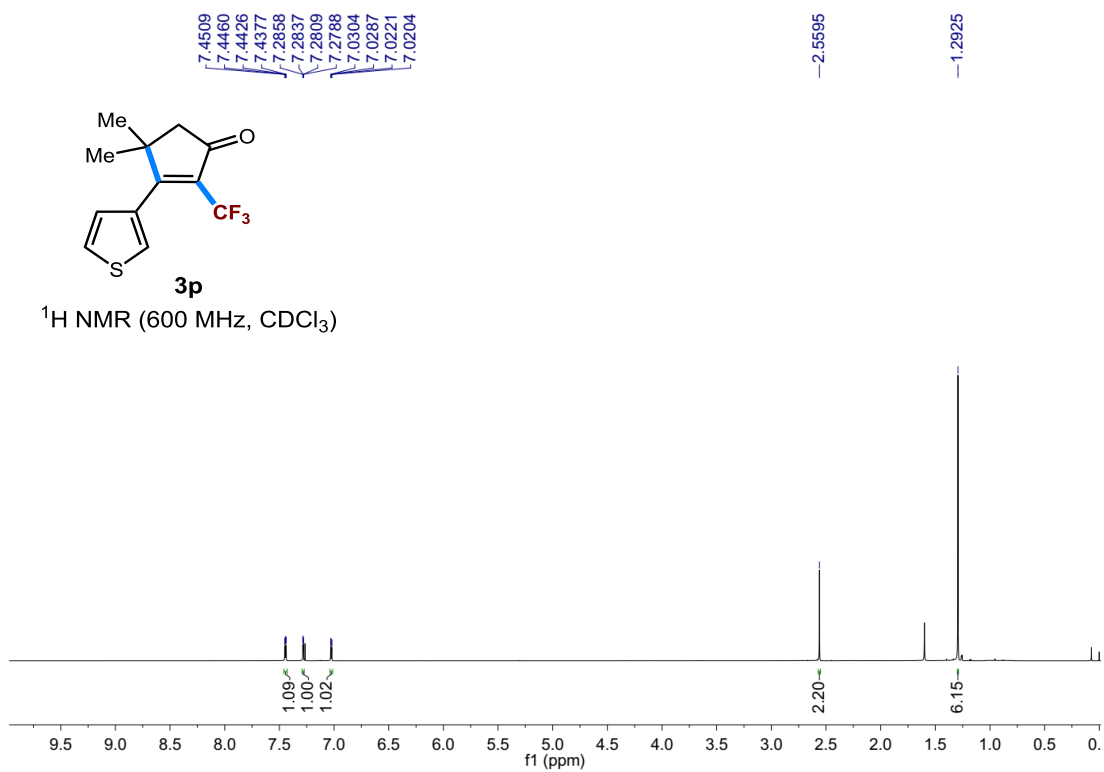

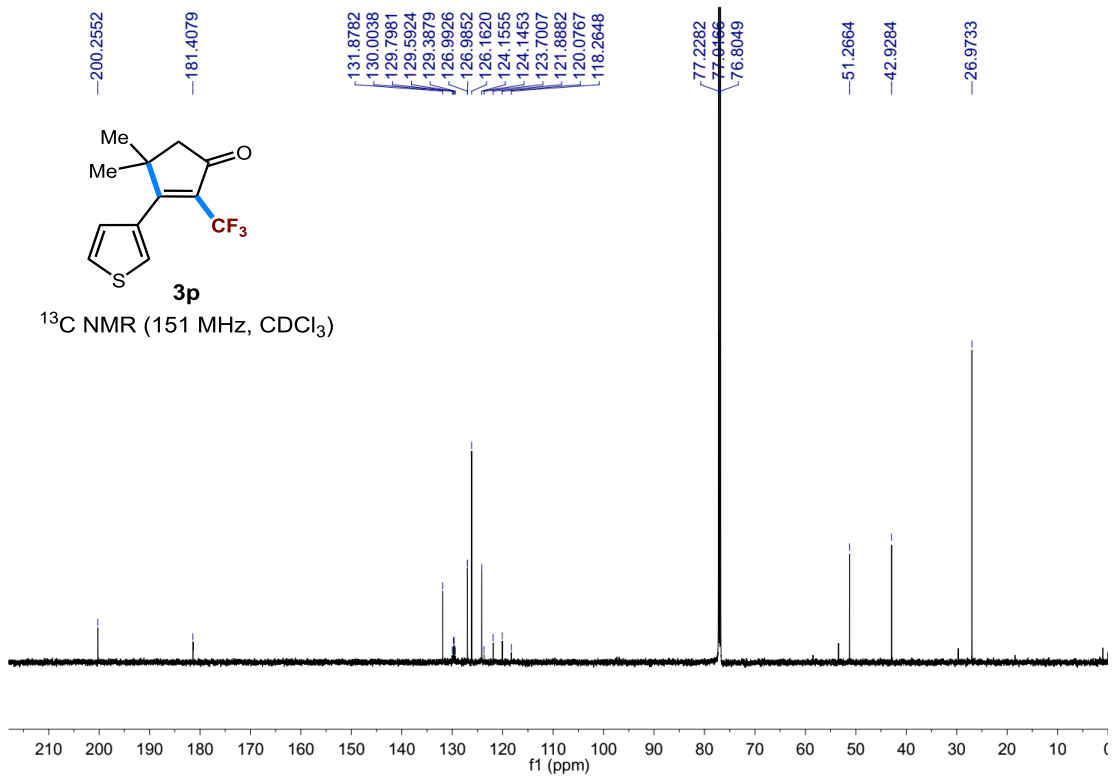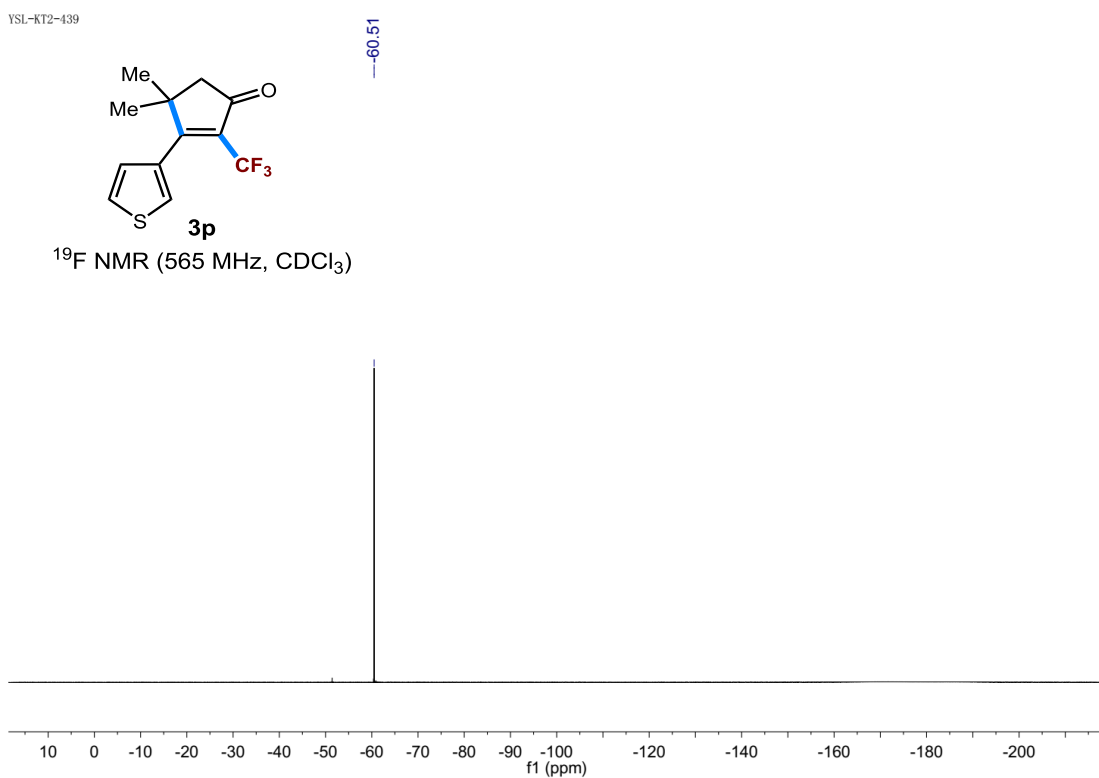

LSY-KT2-244

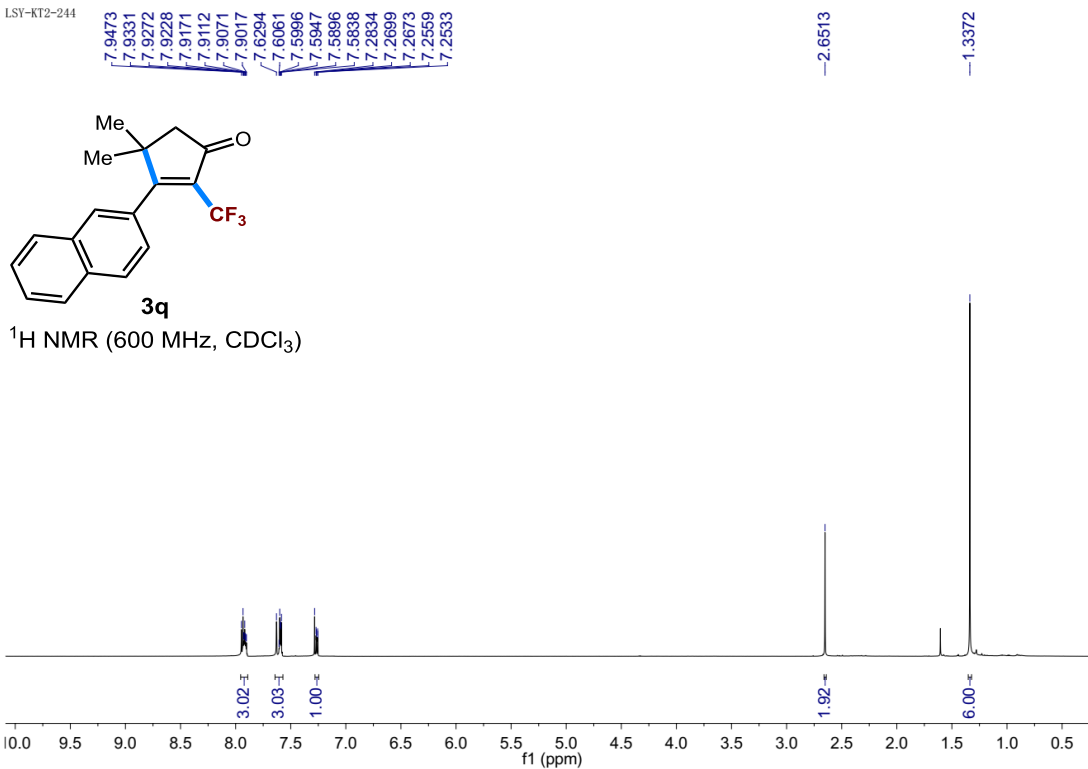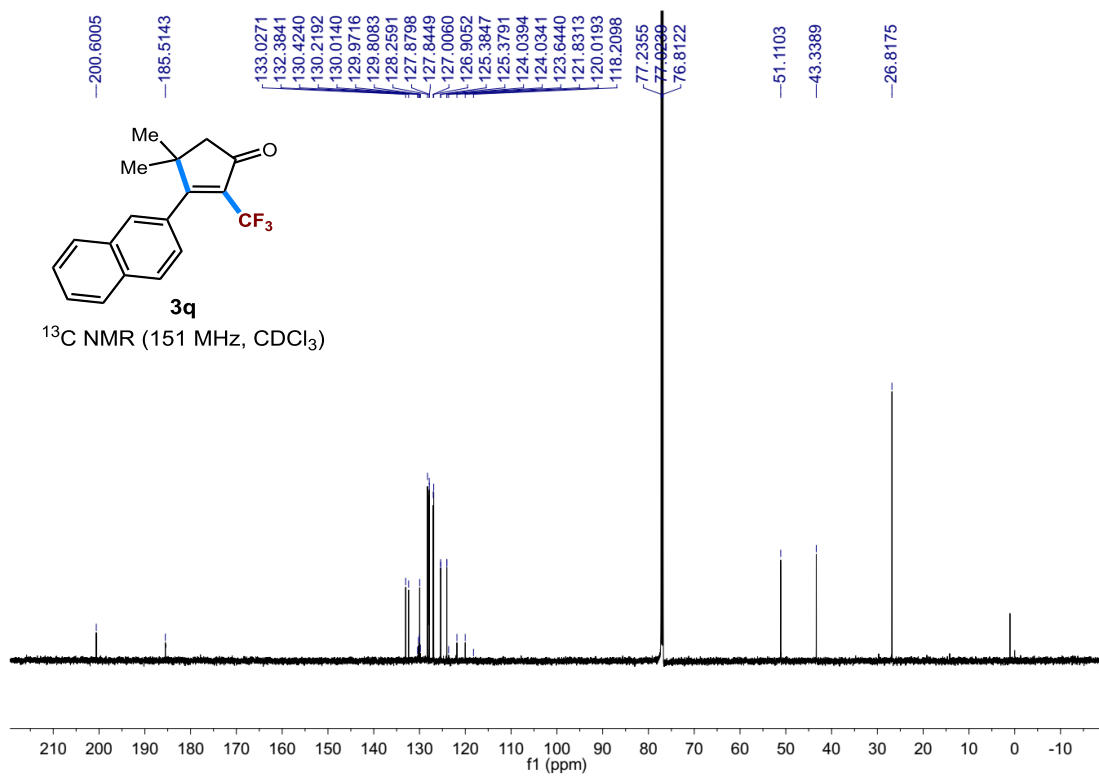

LSY-KT2-244

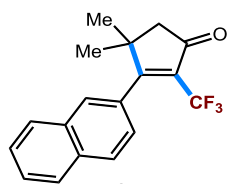

<sup>19</sup>F NMR (565 MHz, CDCl<sub>3</sub>)

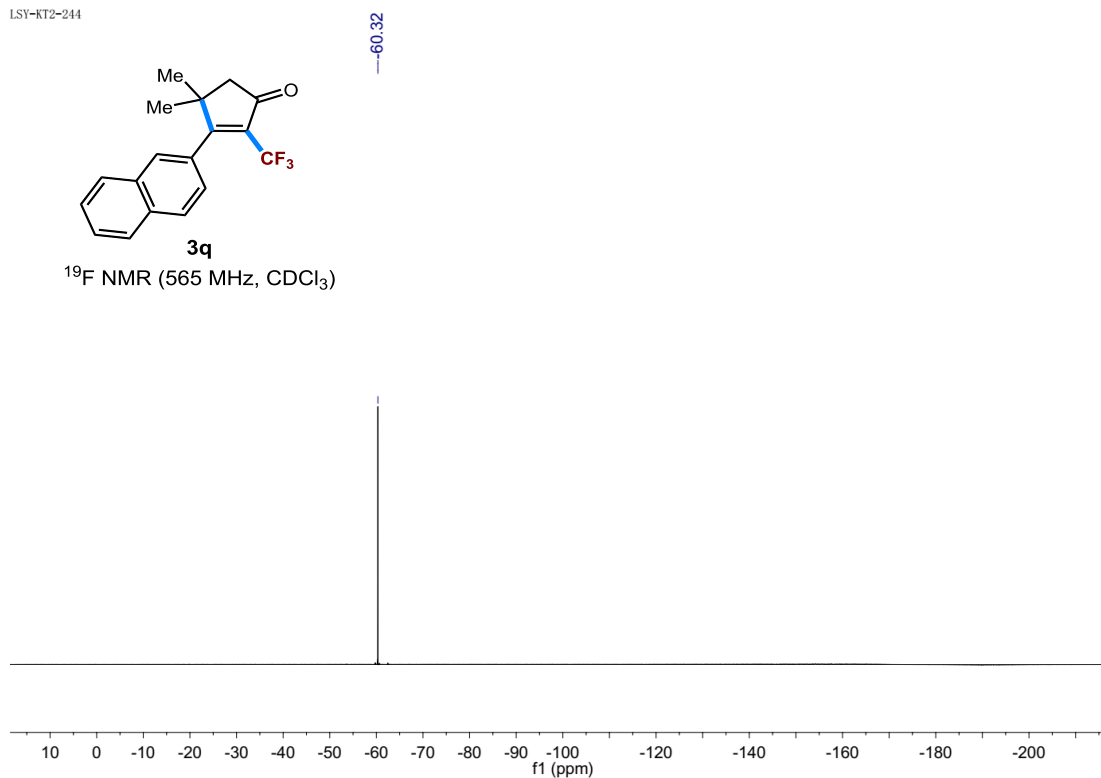

YSL-KT2-287

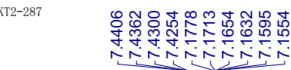

<sup>1</sup>H NMR (600 MHz, CDCl<sub>3</sub>)

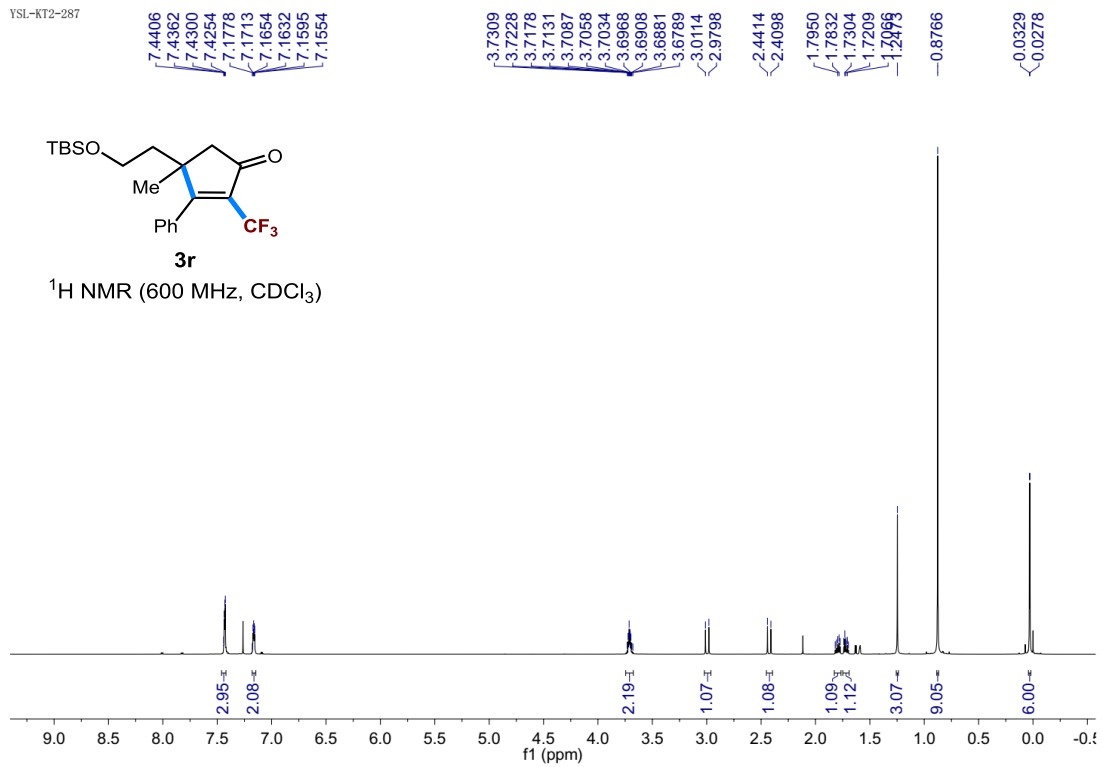



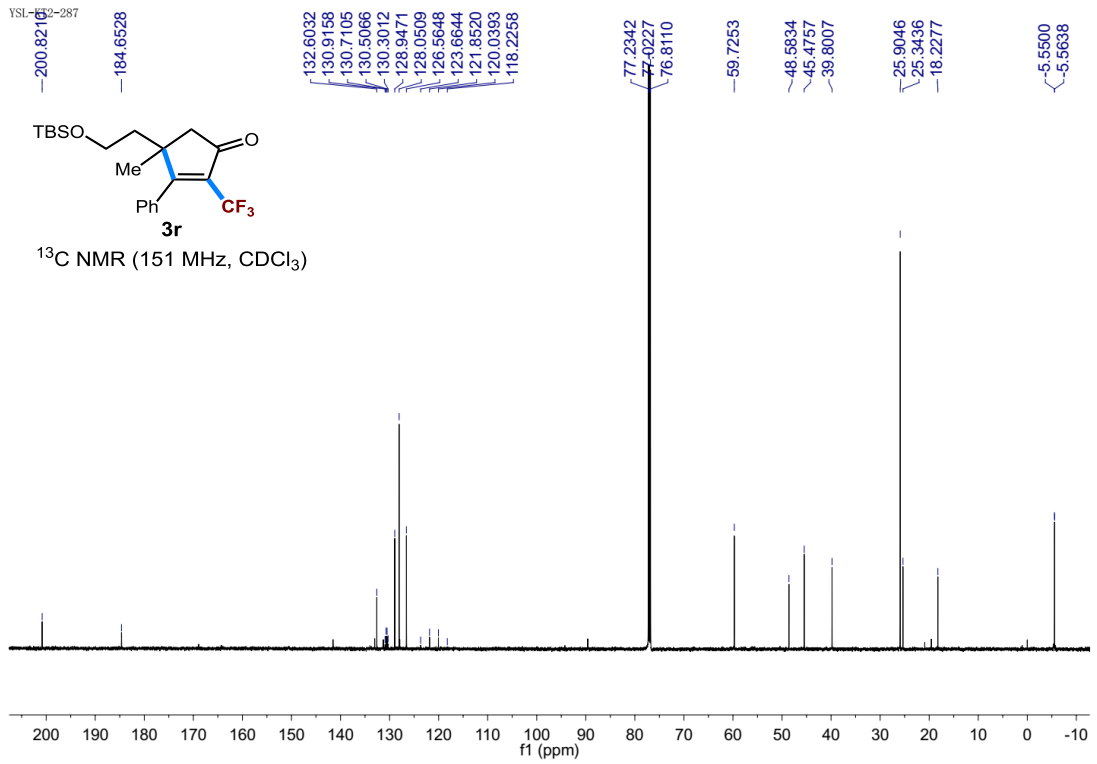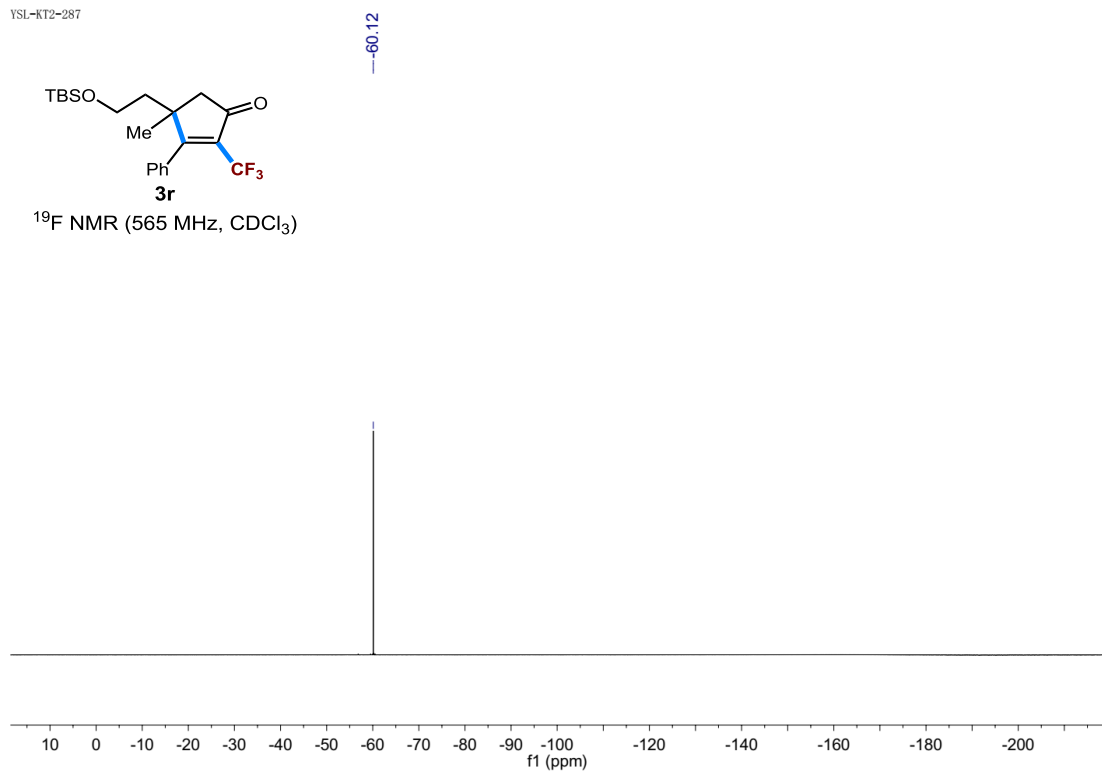

LSY-KT2-282

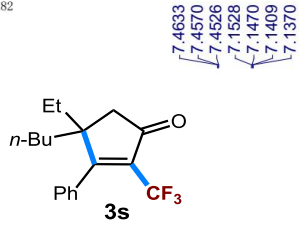

<sup>1</sup>H NMR (600 MHz, CDCl<sub>3</sub>)

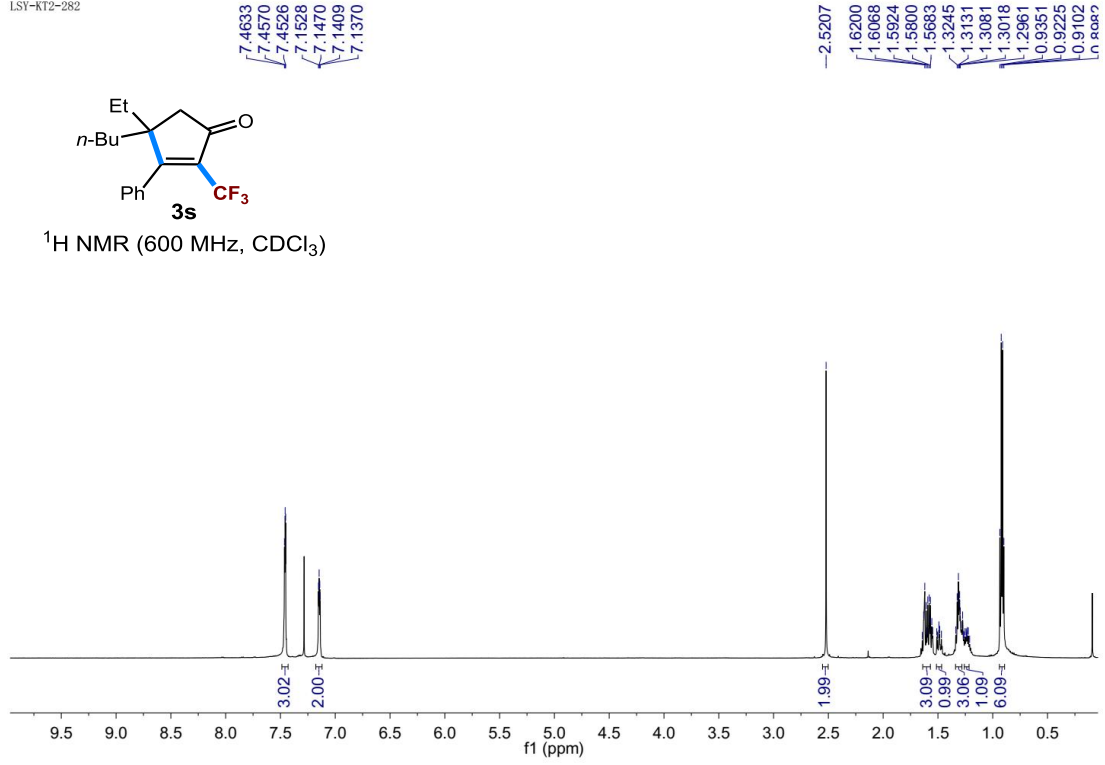

LSY-KT2-282

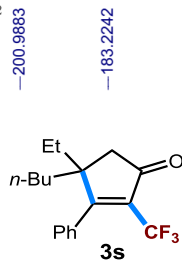

<sup>13</sup>C NMR (151 MHz, CDCl<sub>3</sub>)

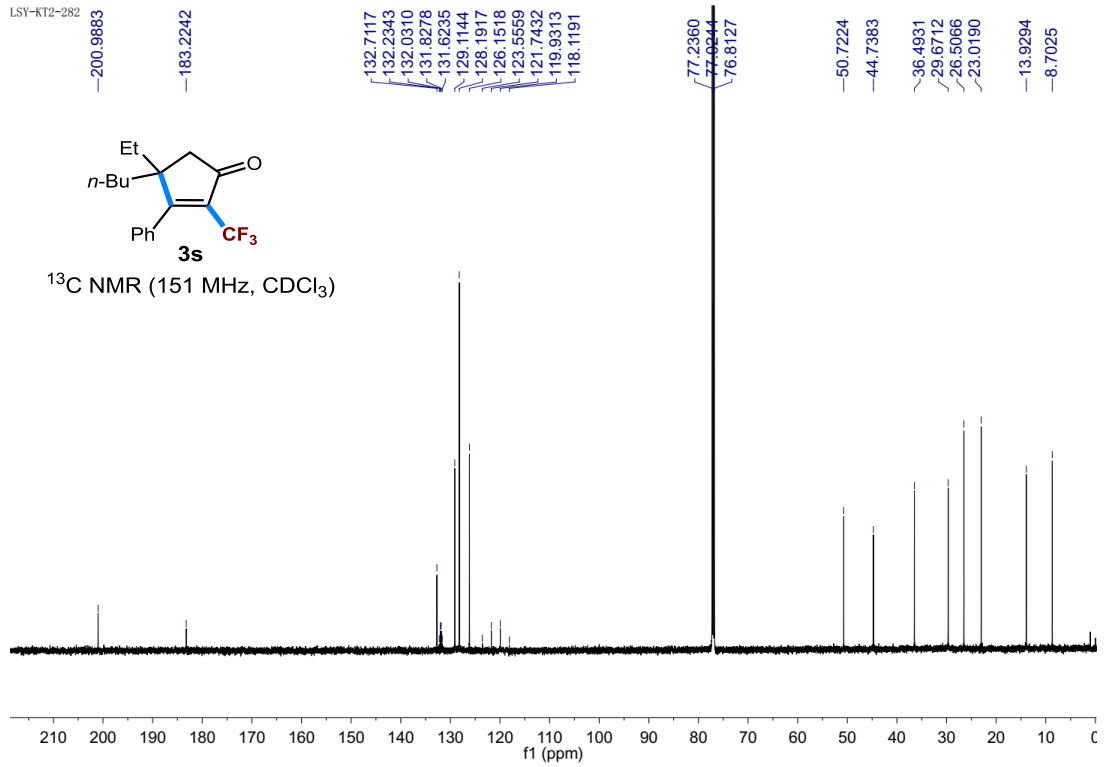

LSY-KT2-282

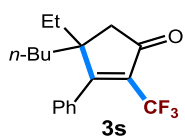

<sup>19</sup>F NMR (565 MHz, CDCl<sub>3</sub>)

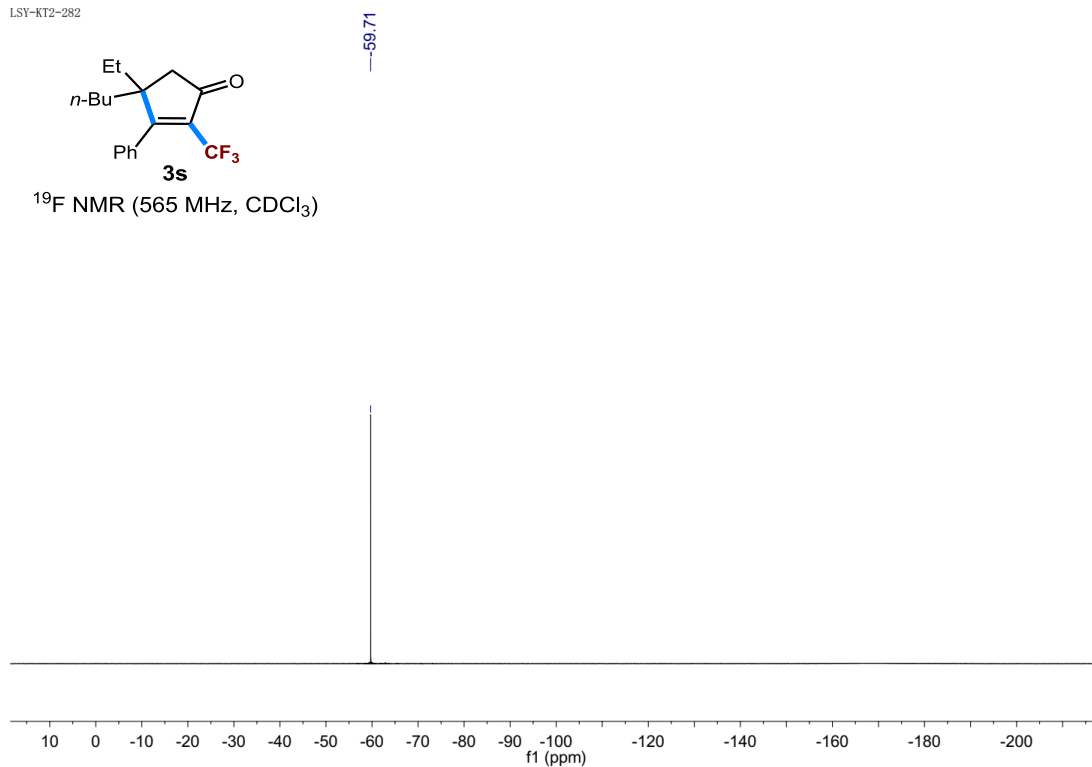

LSY-KT2-191

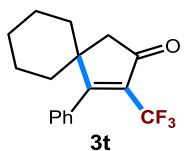

<sup>1</sup>H NMR (600 MHz, CDCl<sub>3</sub>)

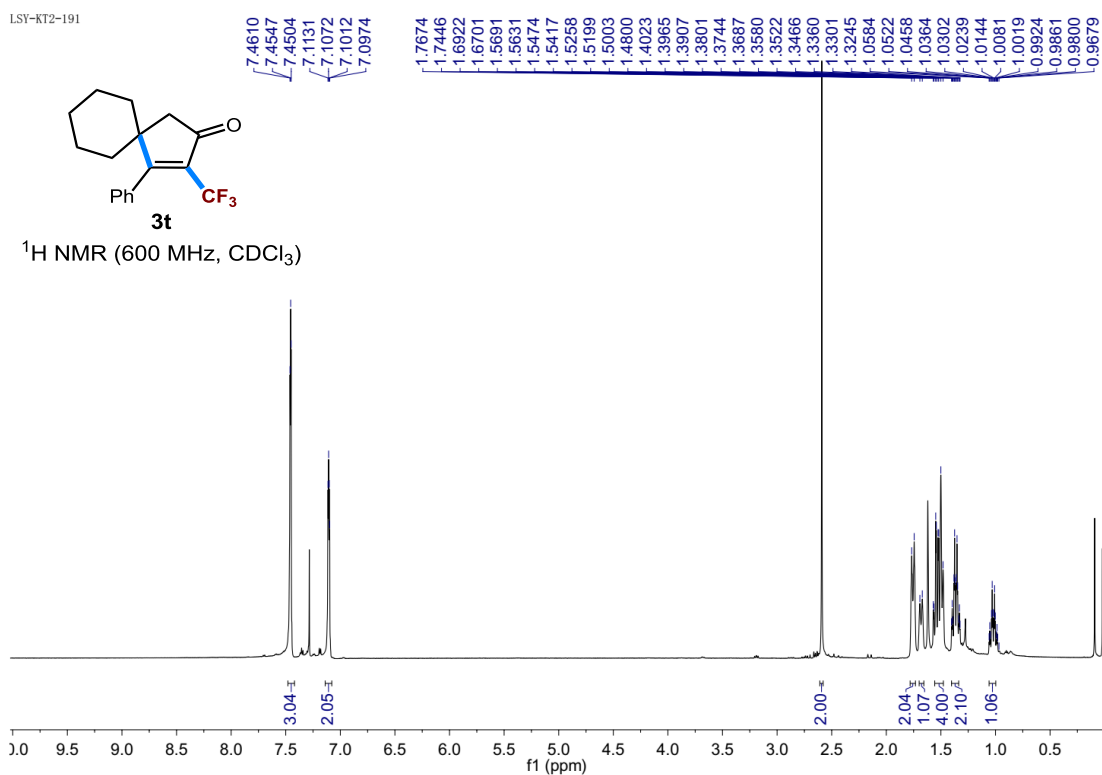

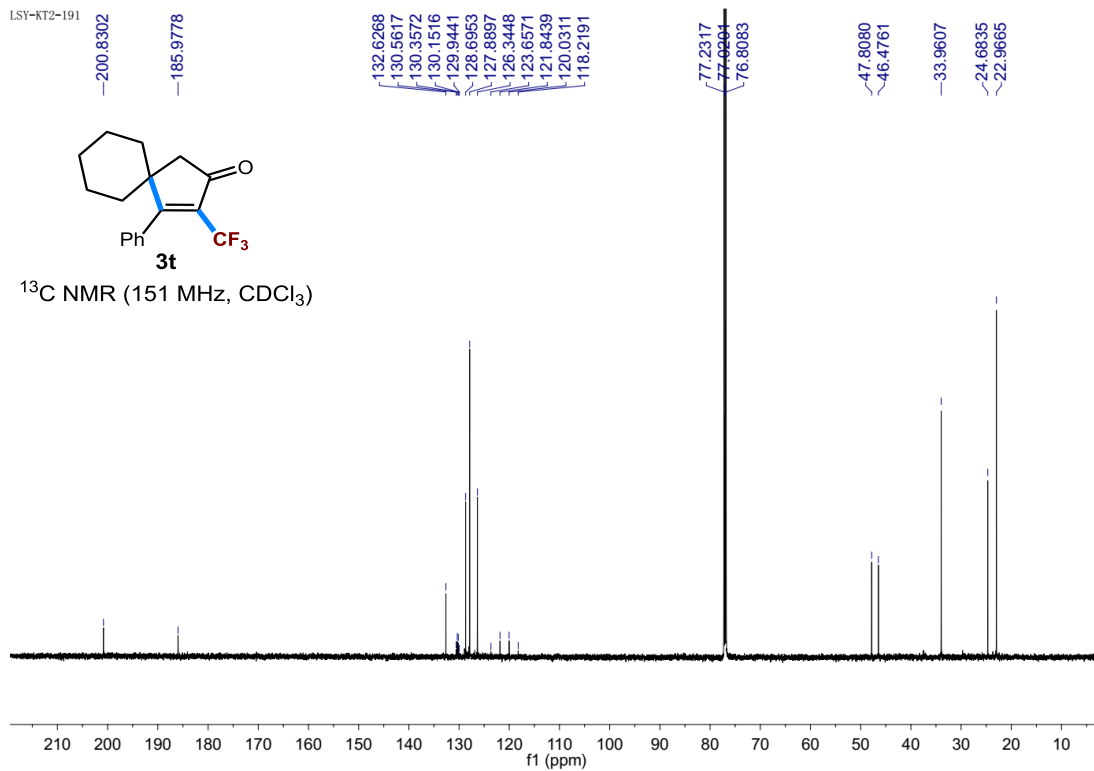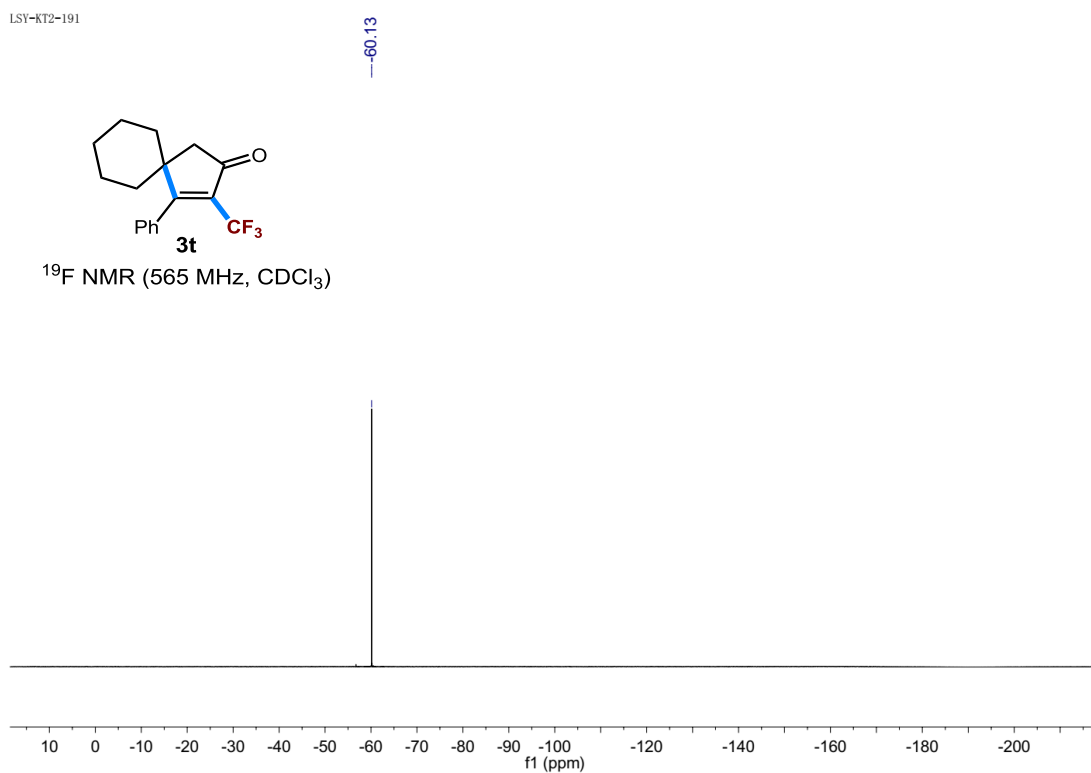

YSL-539-3

7.4387  
7.4358  
7.4340  
7.4294  
7.4267  
7.4222  
7.4185  
7.4108  
7.1240  
7.1196  
7.1164  
7.1111  
7.1081

2.5135  
1.7877  
1.7075  
1.7017  
1.7000  
1.6977  
1.6963  
1.6917  
1.6866  
1.6819  
1.5959  
1.5908  
1.5841  
1.5708

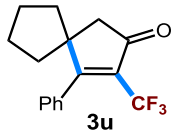

$^1\text{H NMR}$  (600 MHz,  $\text{CDCl}_3$ )

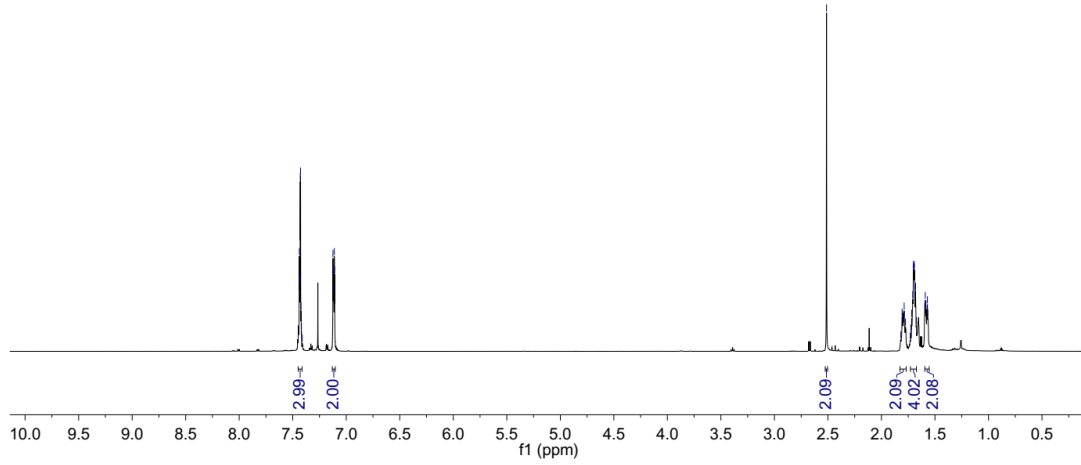

YSL-539-3

200.6422  
183.9814  
183.9641  
183.9454  
183.9268

132.3876  
131.3437  
131.1385  
130.9339  
130.7297  
128.7419  
127.9661  
126.5910  
126.5857  
123.5386  
121.7284  
119.9170  
118.1055

54.1638  
49.8480  
36.9919  
23.8561

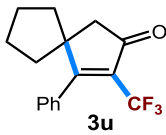

$^{13}\text{C NMR}$  (151 MHz,  $\text{CDCl}_3$ )

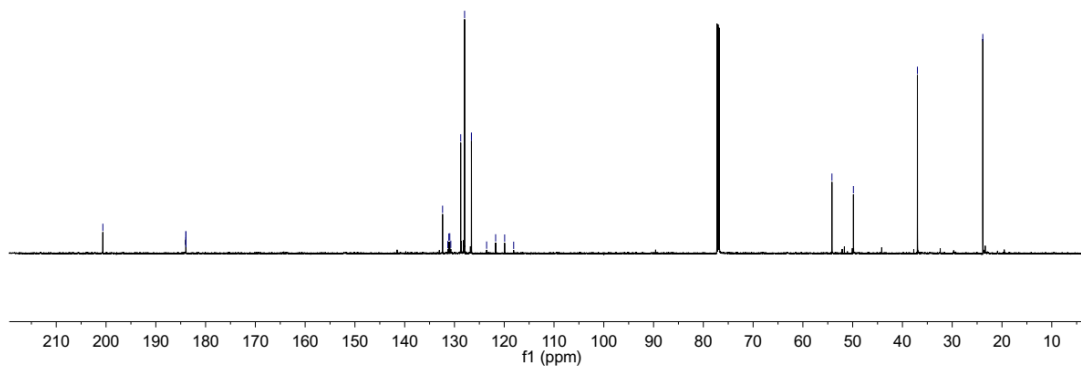

YSL-539-N

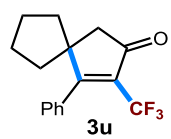

<sup>19</sup>F NMR (565 MHz, CDCl<sub>3</sub>)

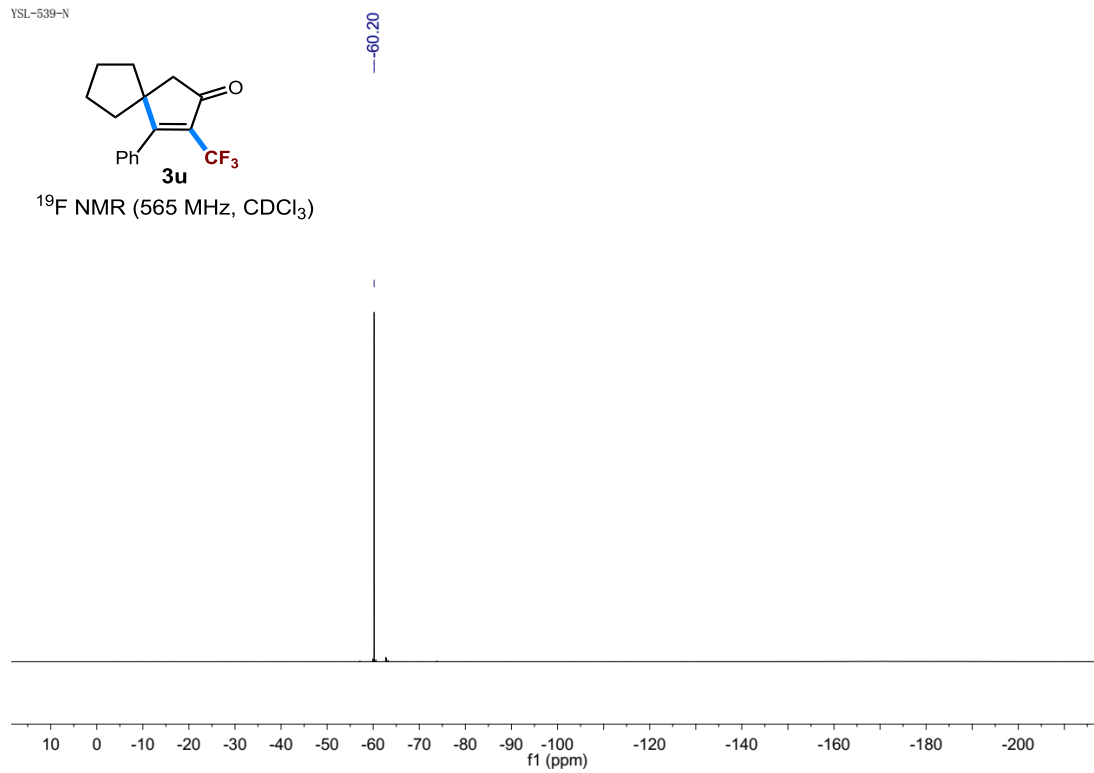

7.4746  
7.4716  
7.4623  
7.3667  
7.3560  
7.3536  
3.7335  
3.7297  
3.7228  
3.7202  
3.0450  
3.0420  
3.0348  
3.0314  
3.0287  
3.0253  
3.0181  
3.0150  
2.0859  
2.0835  
2.0753  
2.0729  
2.0643  
2.0619  
2.0519  
1.8607  
1.8536  
1.8506  
1.8438  
1.8338  
1.6933  
1.6881  
1.6830  
1.6773  
1.6668  
1.6636  
1.6522  
1.6481  
1.6352  
1.6318  
1.6254  
1.6214  
1.5058  
1.5034  
1.4994  
1.4957  
1.4929  
1.4894  
1.4842  
1.4817  
1.4745  
1.4723  
1.3266  
1.3166  
1.3068  
1.2967  
1.2864  
1.2539

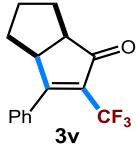

<sup>1</sup>H NMR (600 MHz, CDCl<sub>3</sub>)

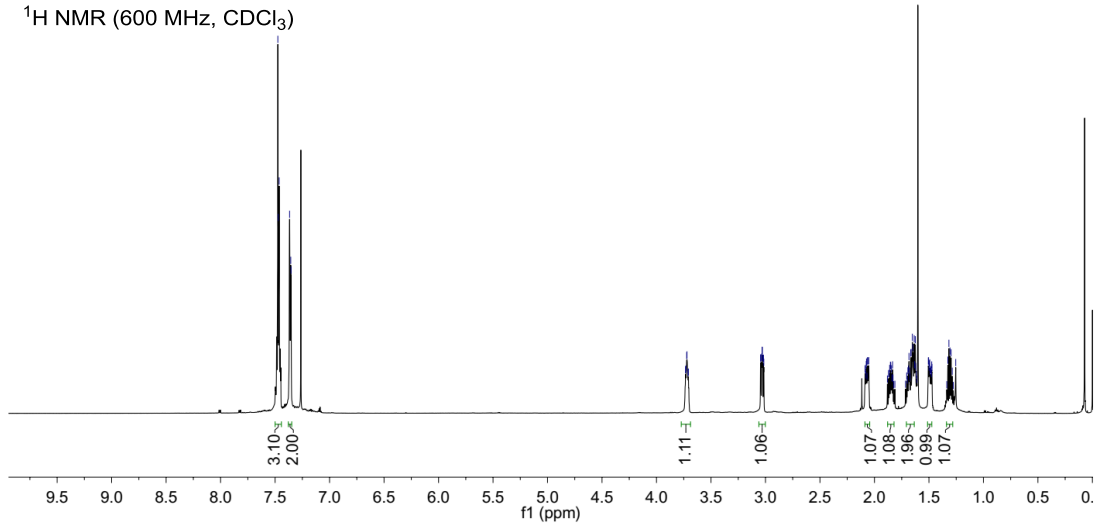

YSL-516  
1D NOE

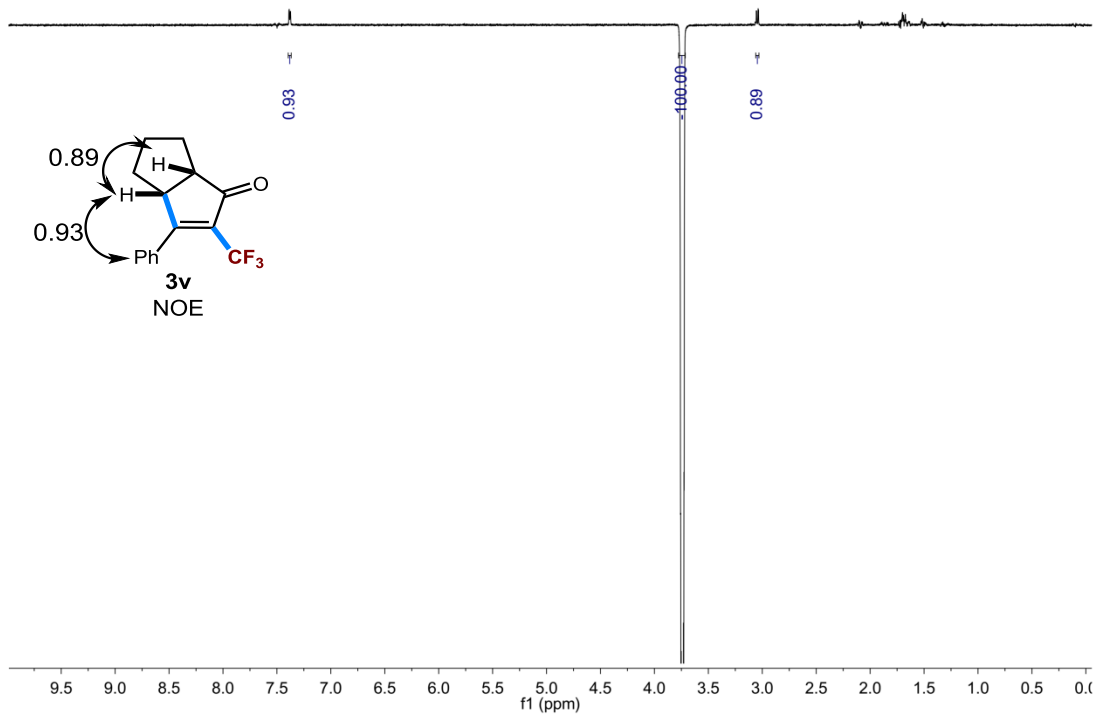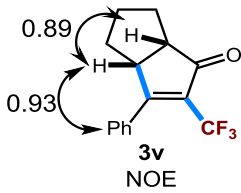

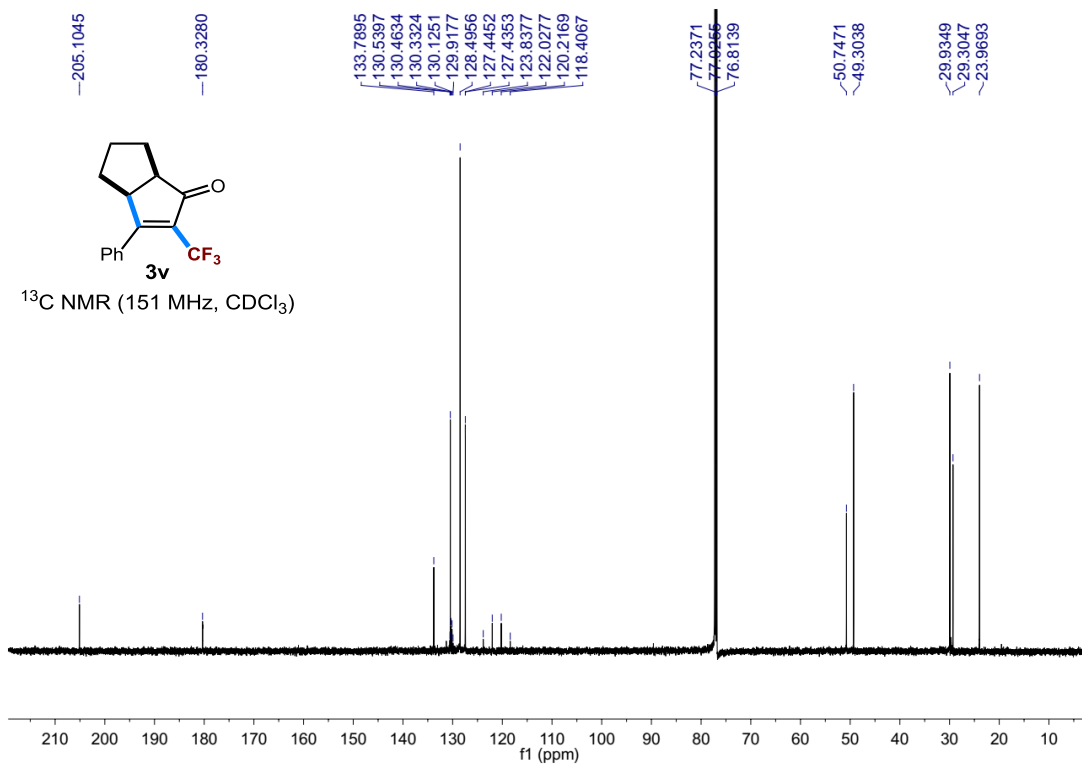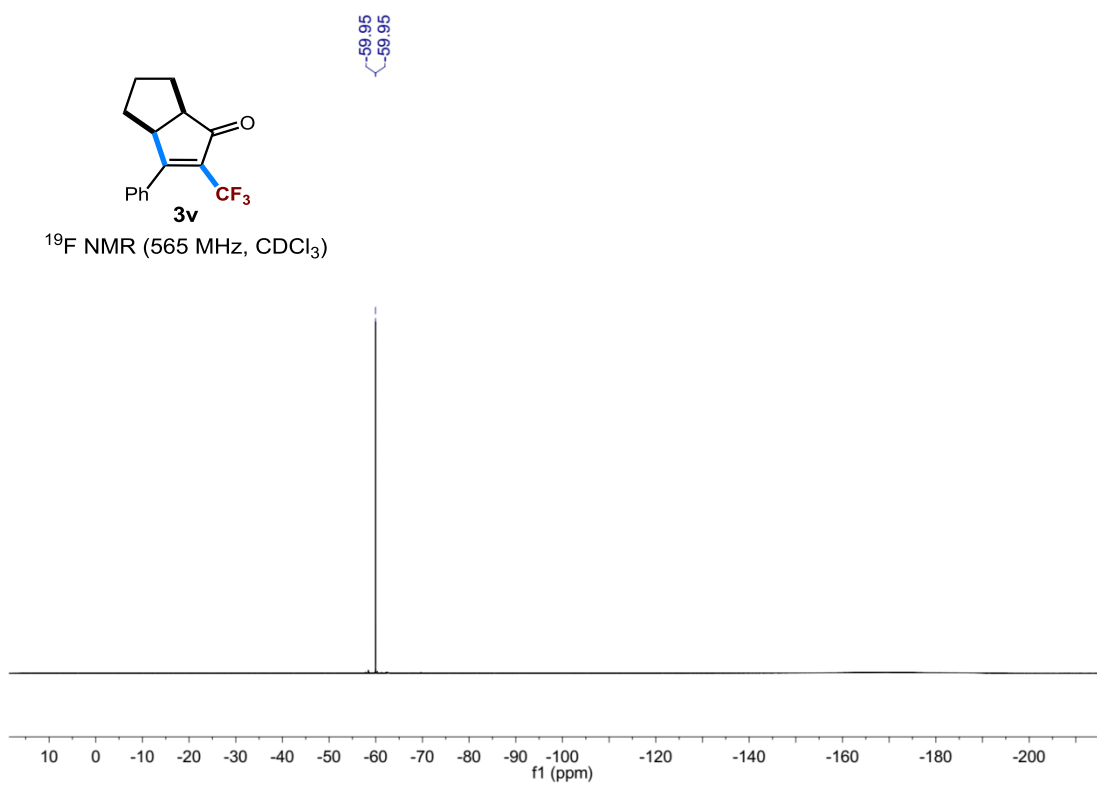



YSL-535-N

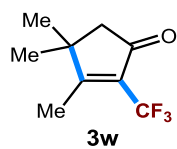

$^1\text{H}$  NMR (600 MHz,  $\text{CDCl}_3$ )

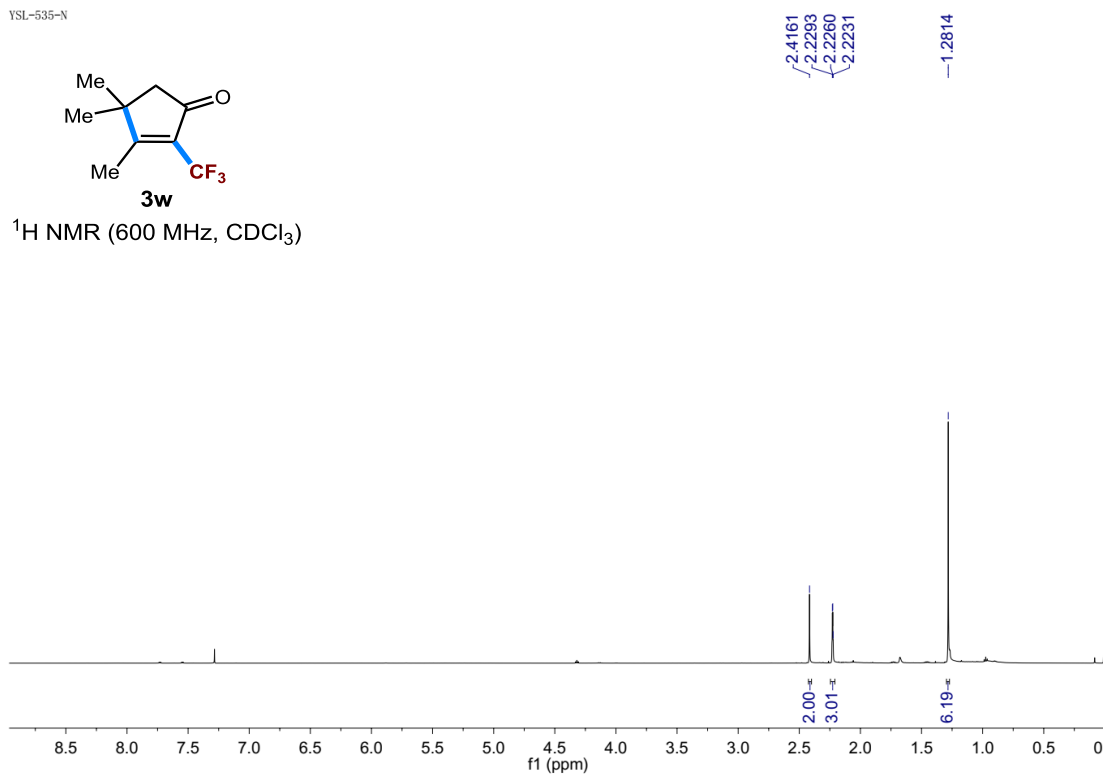

YSL-535-N

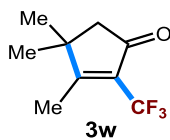

$^{13}\text{C}$  NMR (151 MHz,  $\text{CDCl}_3$ )

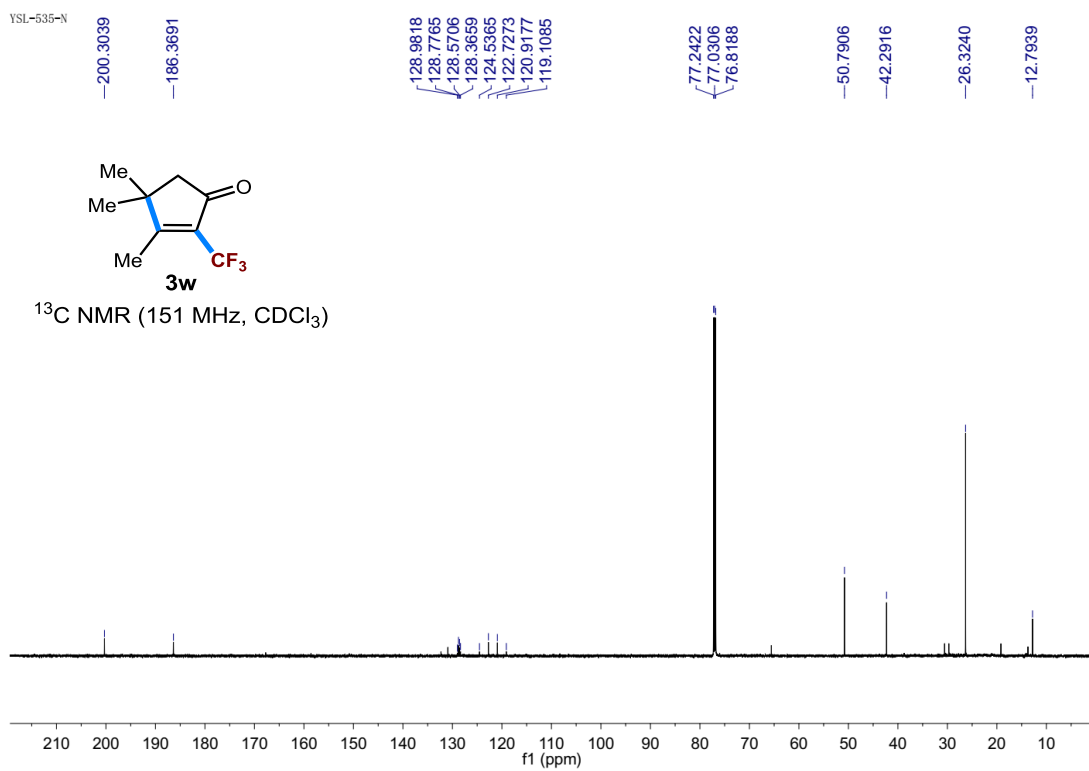

YSL-535-N

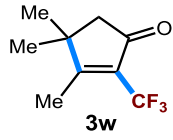

$^{19}\text{F}$  NMR (565 MHz,  $\text{CDCl}_3$ )

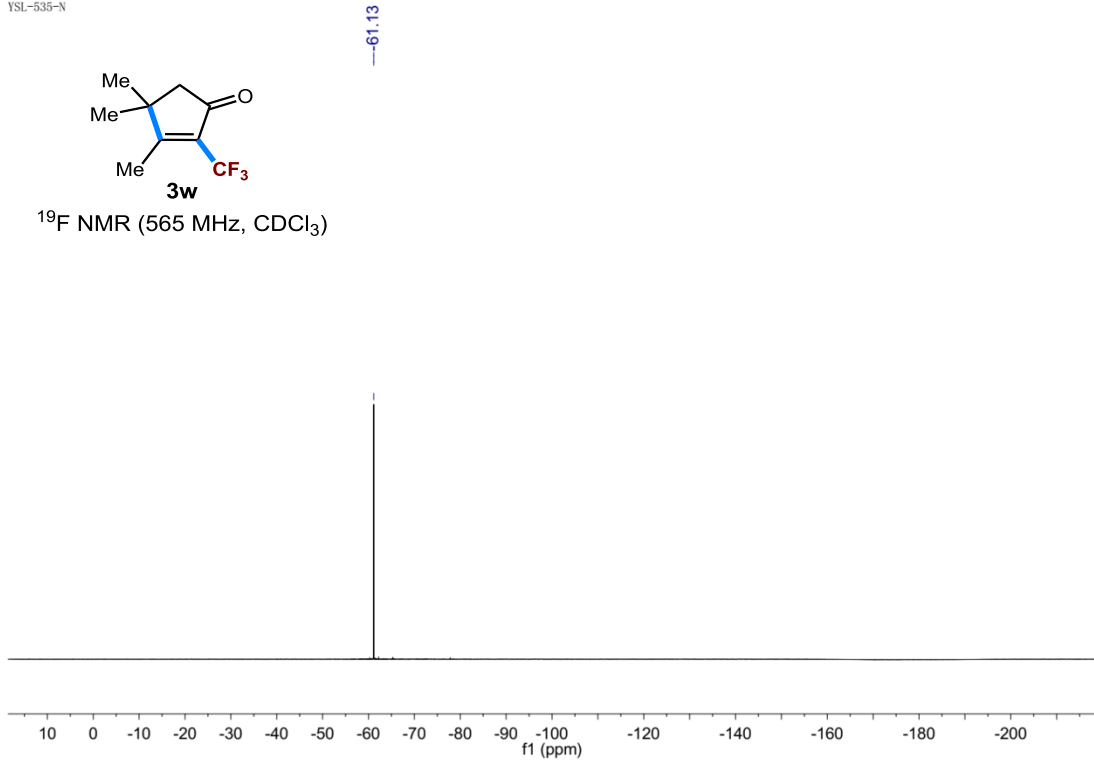

YSL-KT2-359

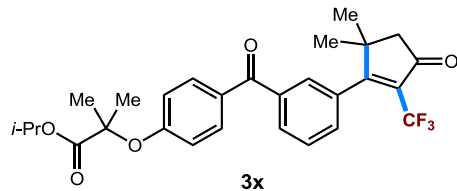

$^1\text{H}$  NMR (600 MHz,  $\text{CDCl}_3$ )

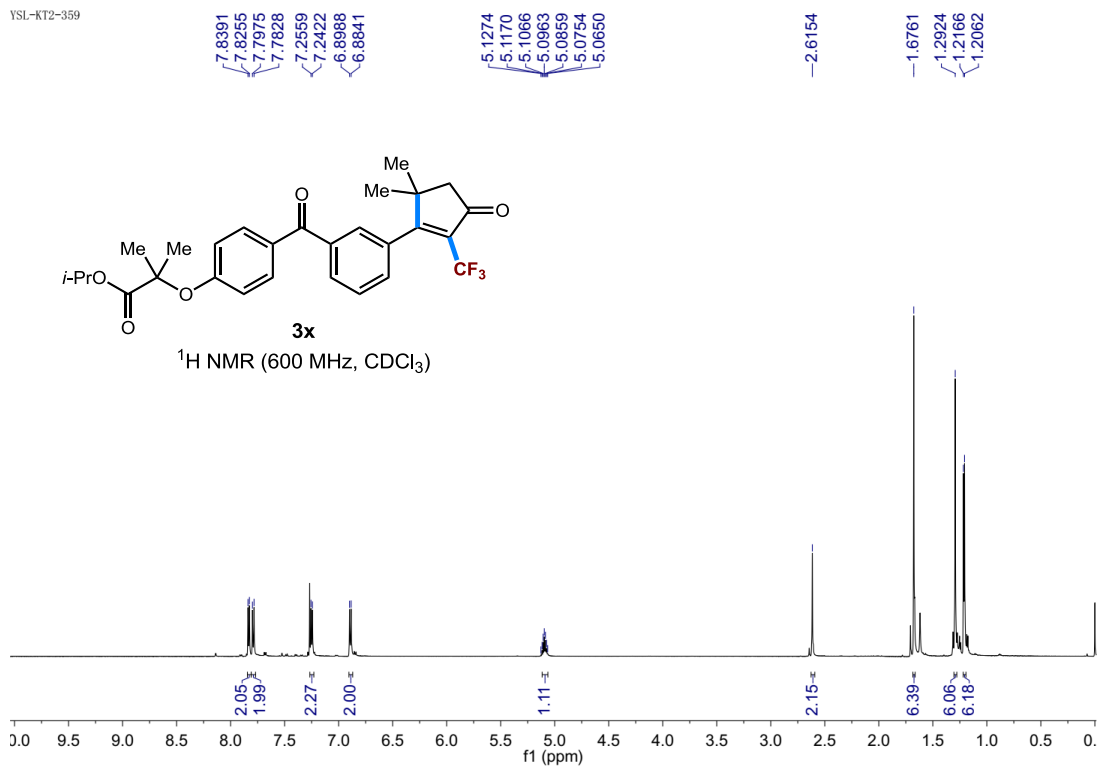

YSL-KT2-359

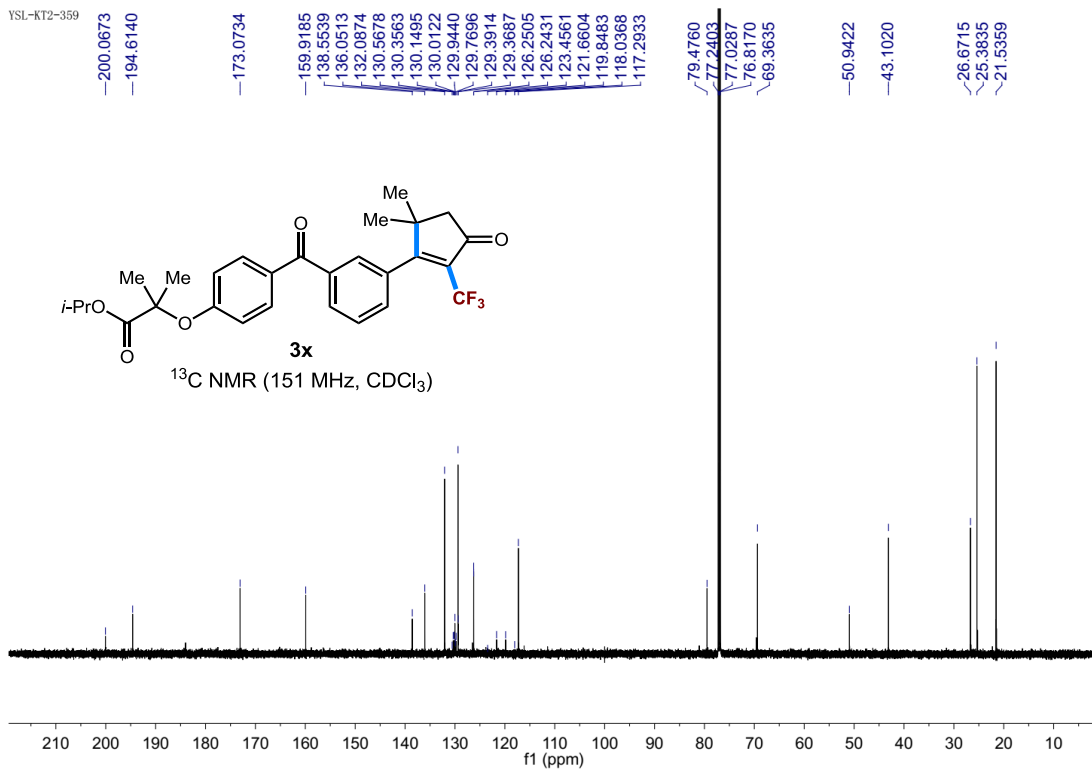

YSL-KT2-359

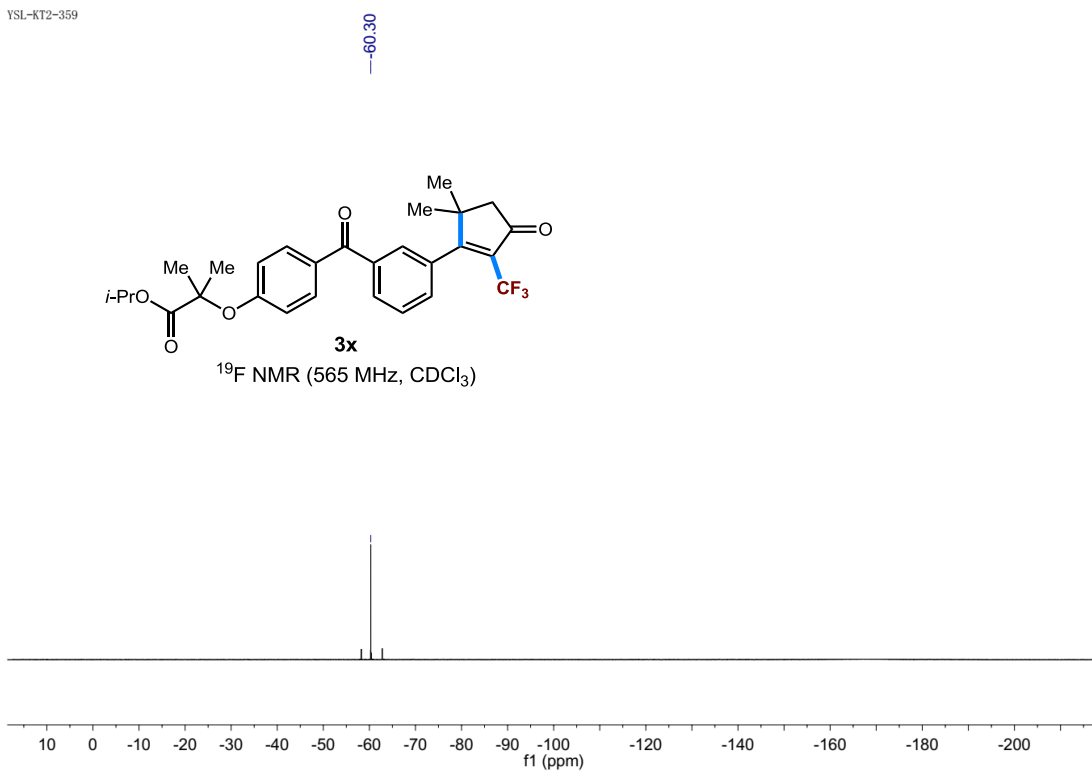

YSL-F13-2

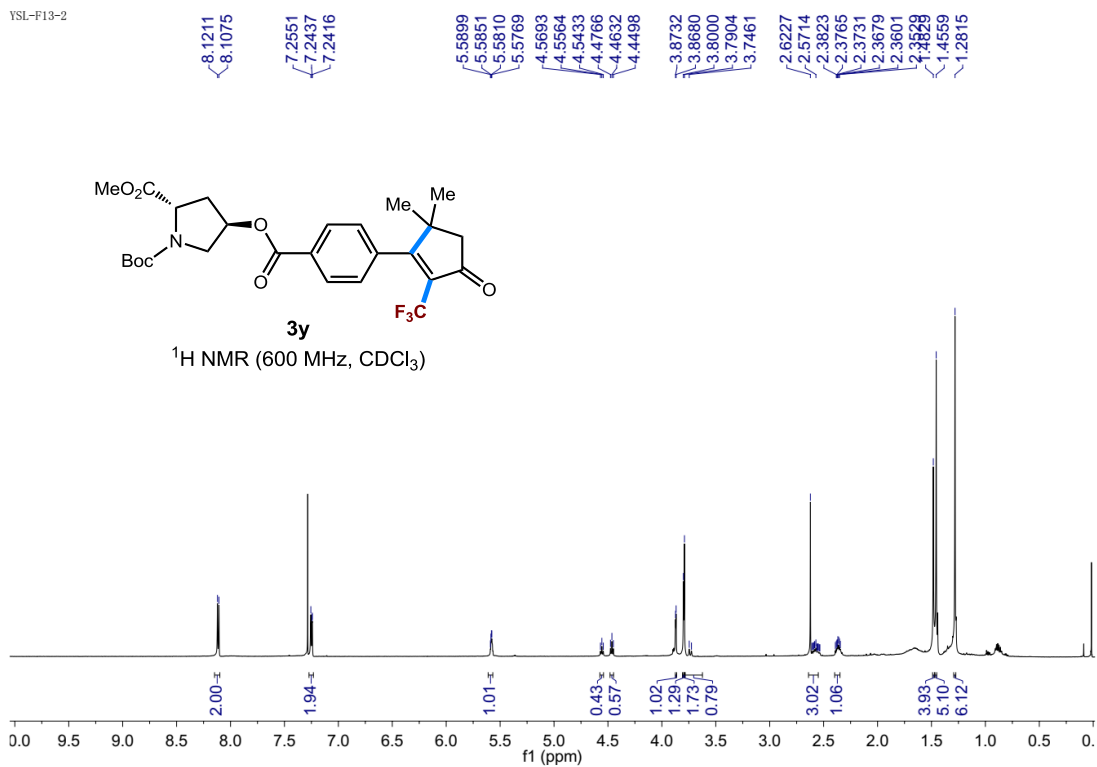

YSL-FB-2

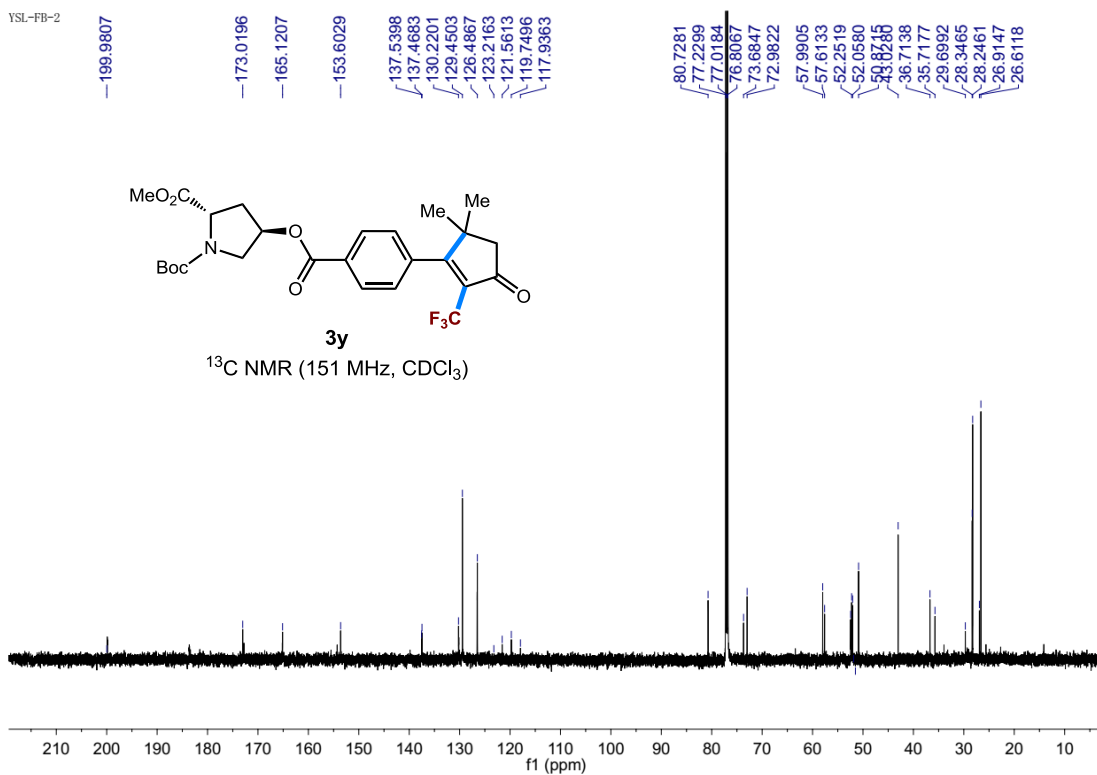

YSL-F13-2

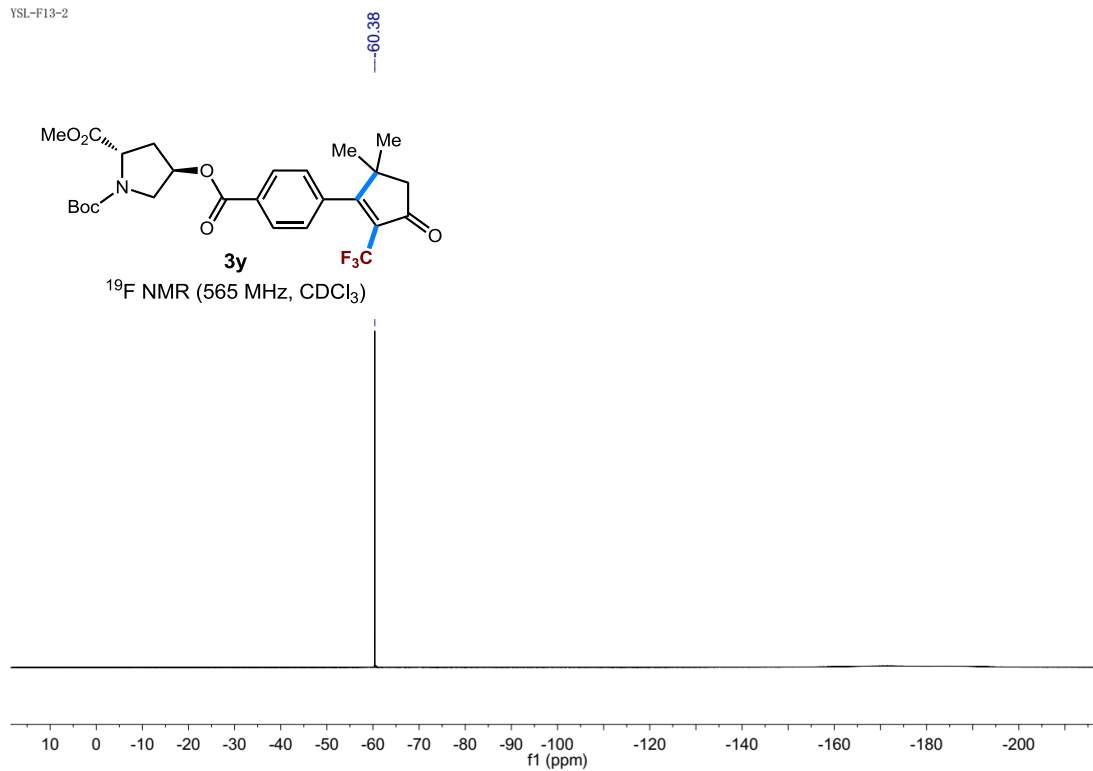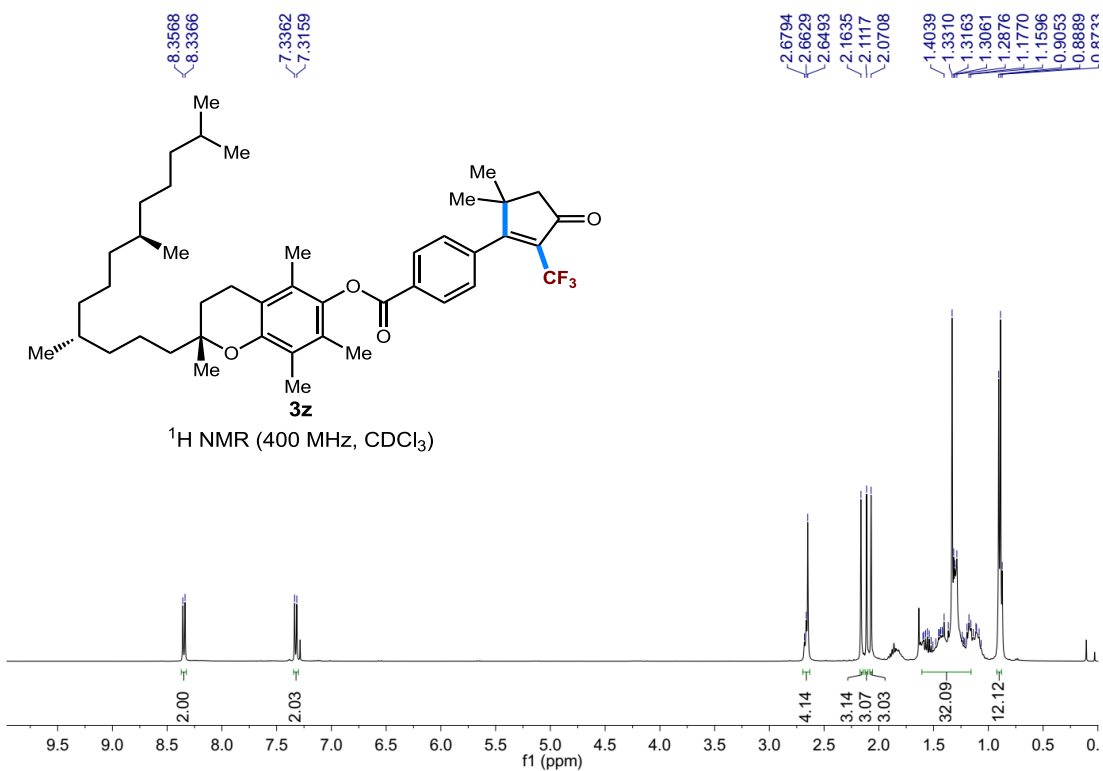

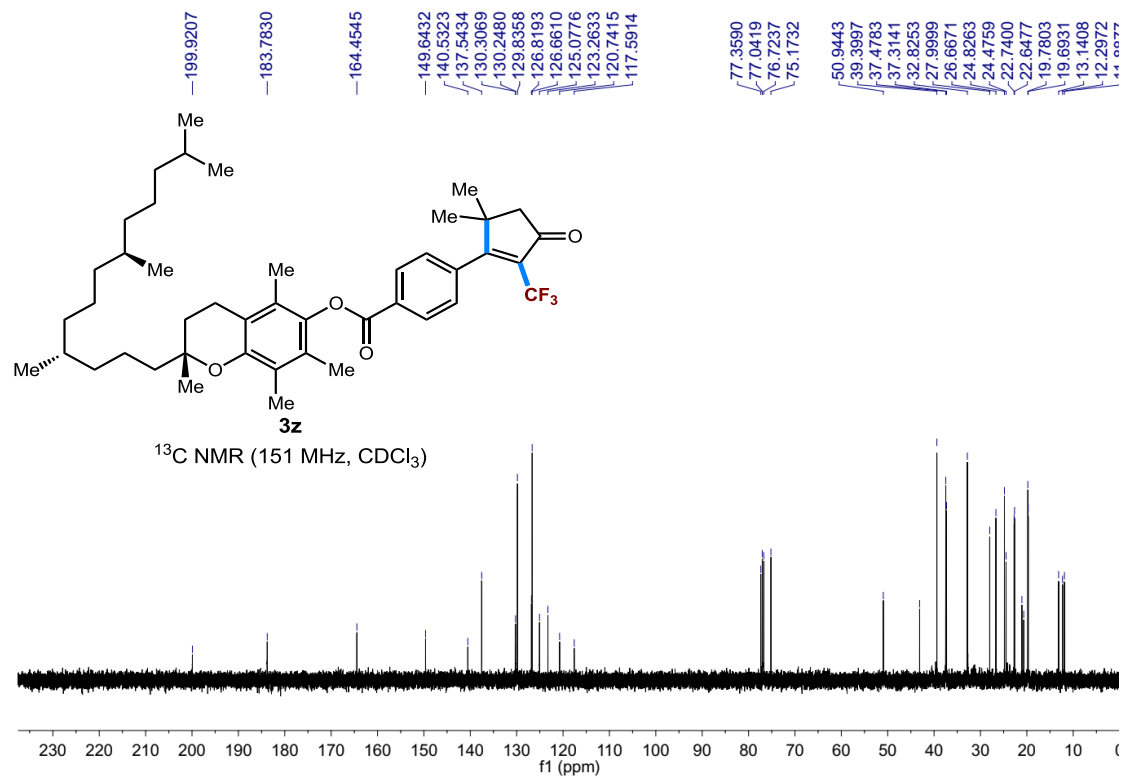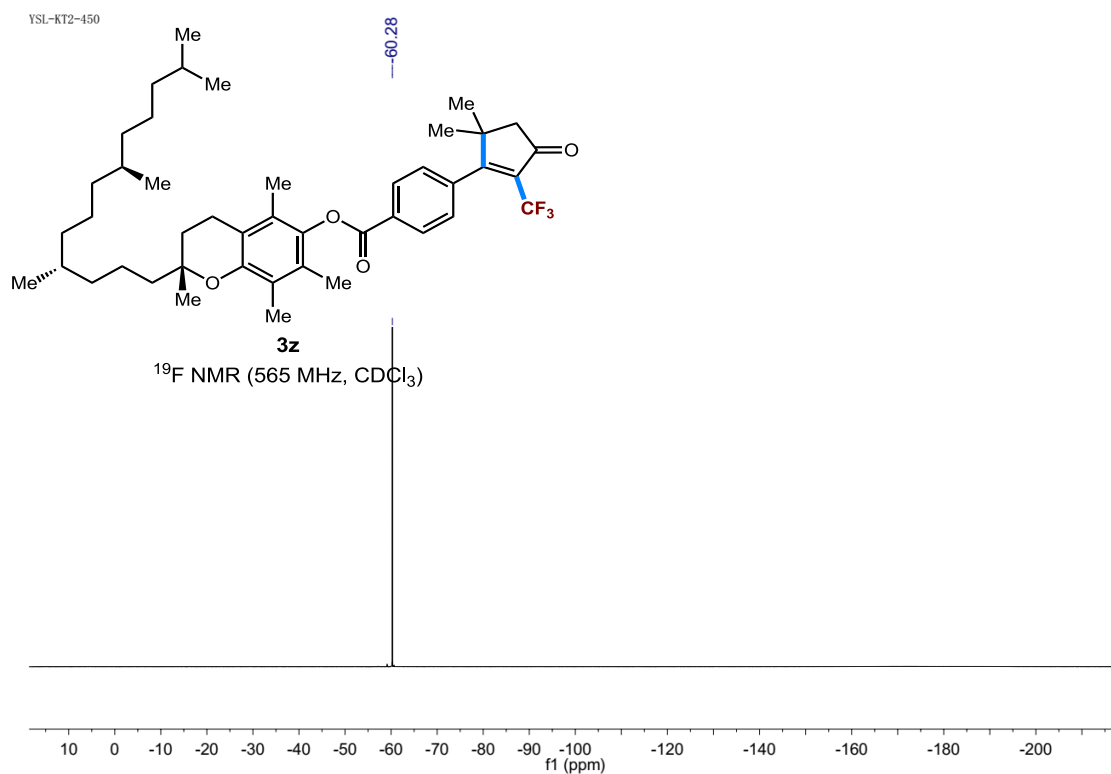

YSL-KT2-370

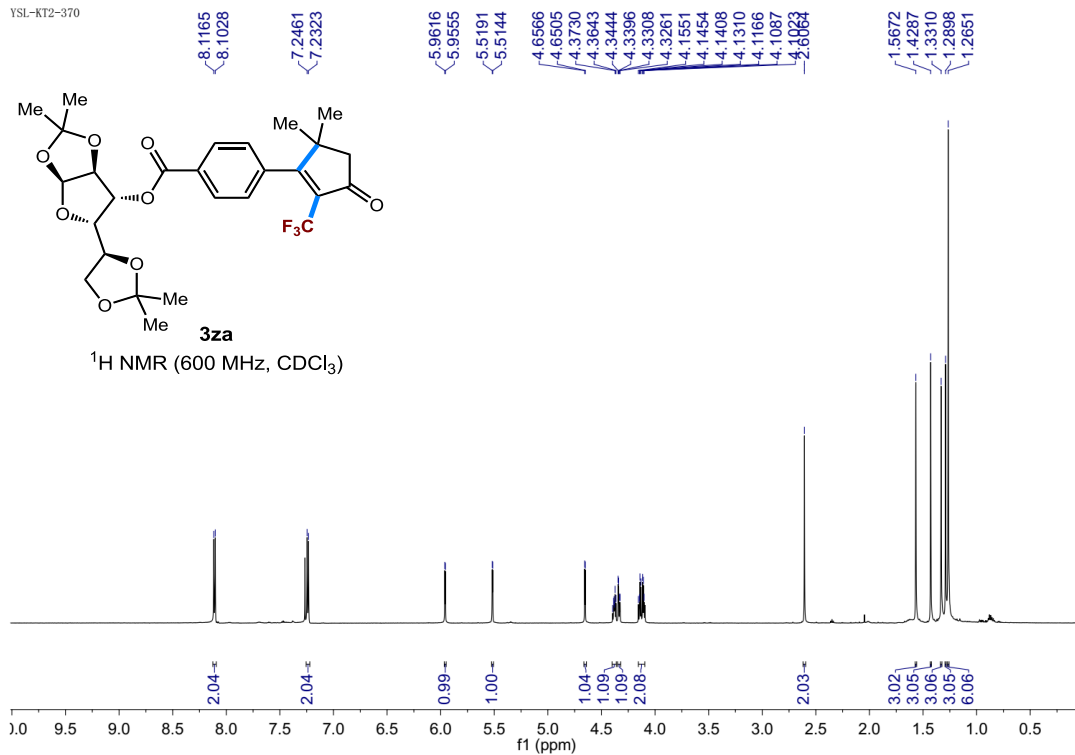

YSL-KT2-370

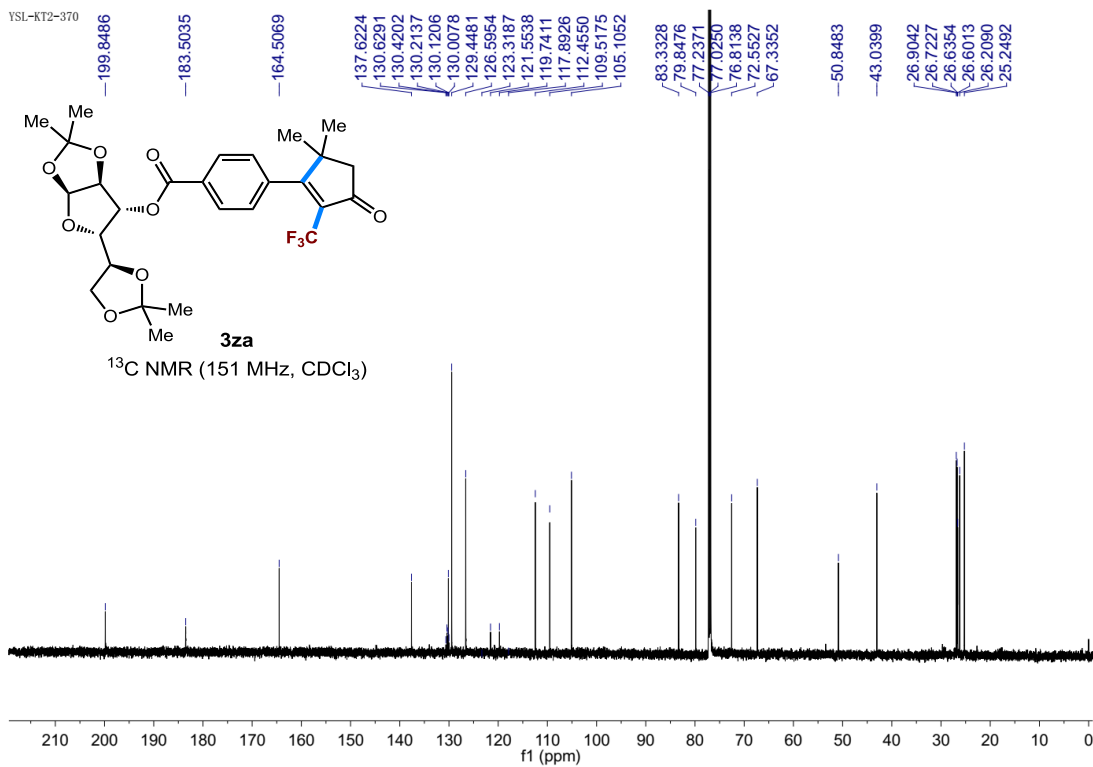

YSL-KT2-370

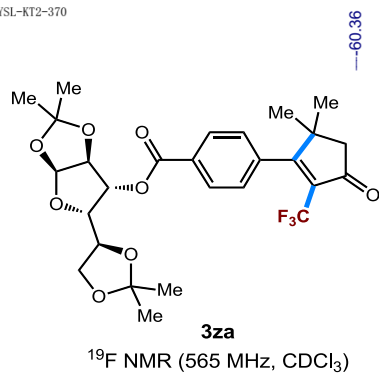

**3za**  
<sup>19</sup>F NMR (565 MHz, CDCl<sub>3</sub>)

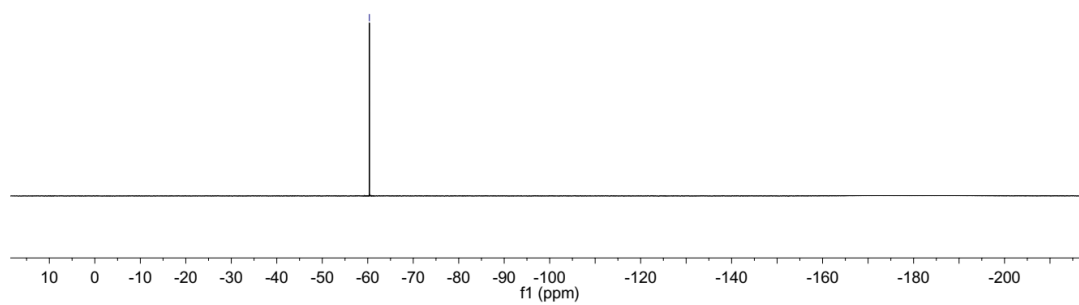

ysl-kt2-363

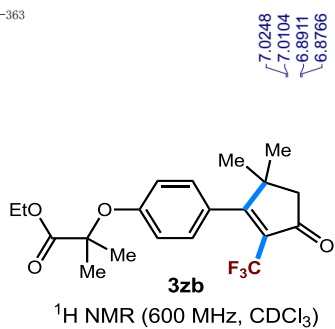

**3zb**  
<sup>1</sup>H NMR (600 MHz, CDCl<sub>3</sub>)

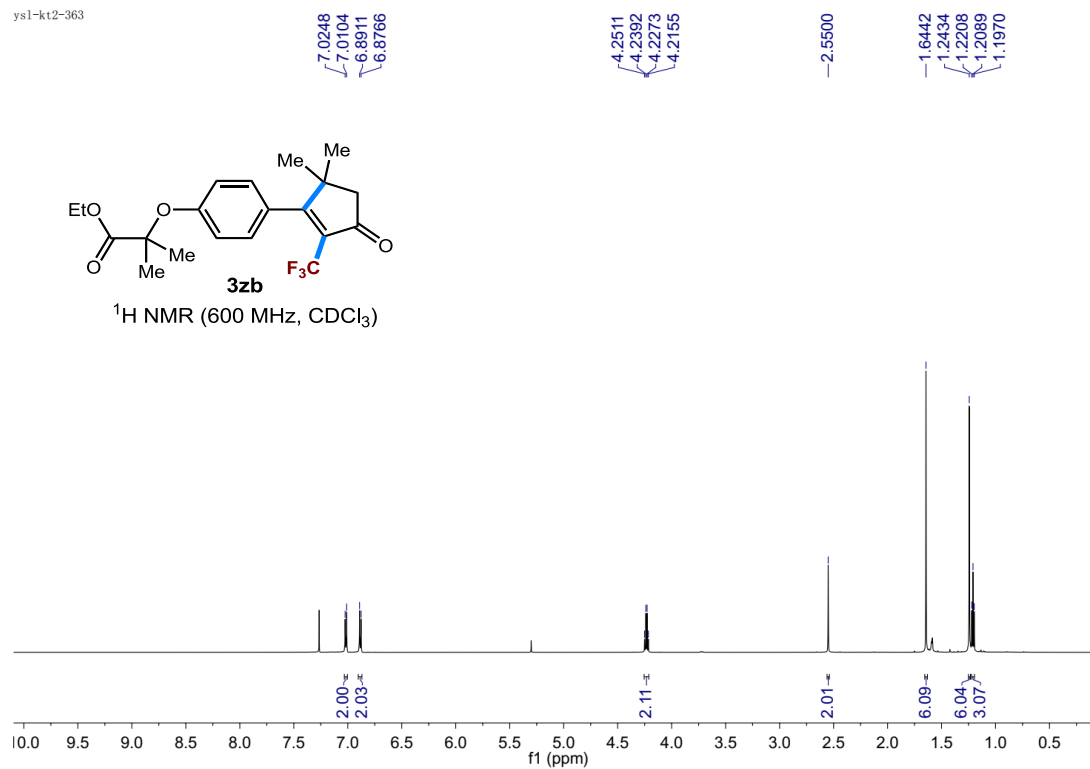



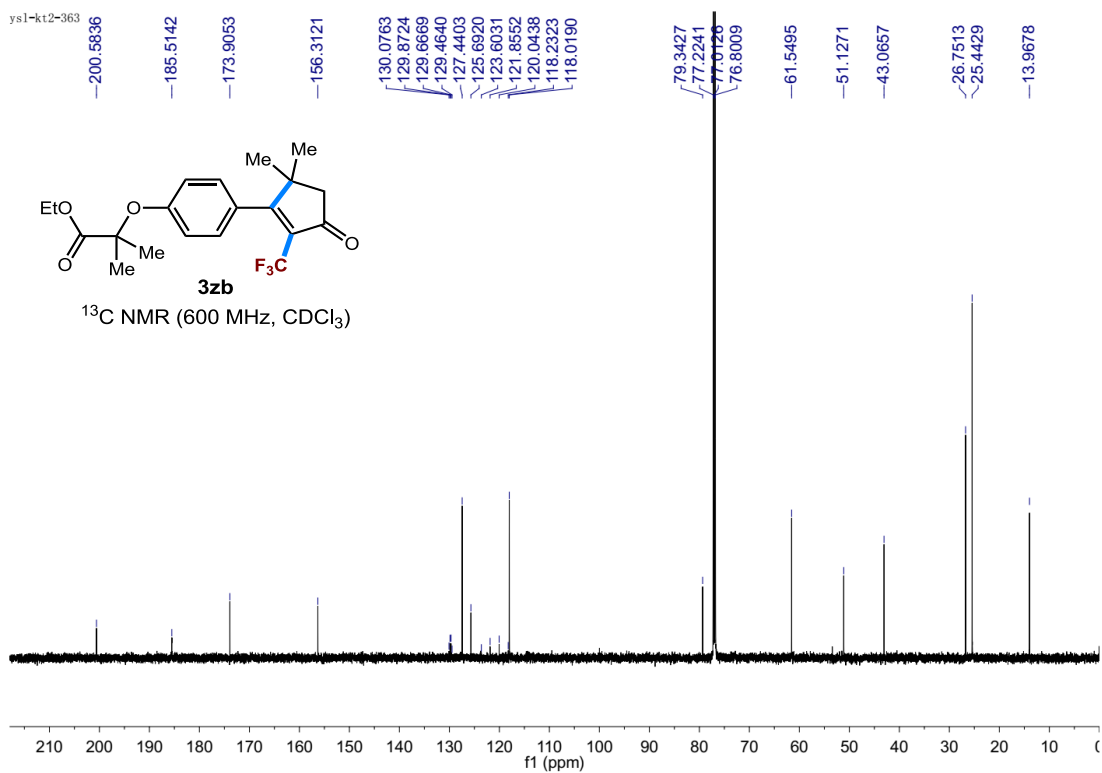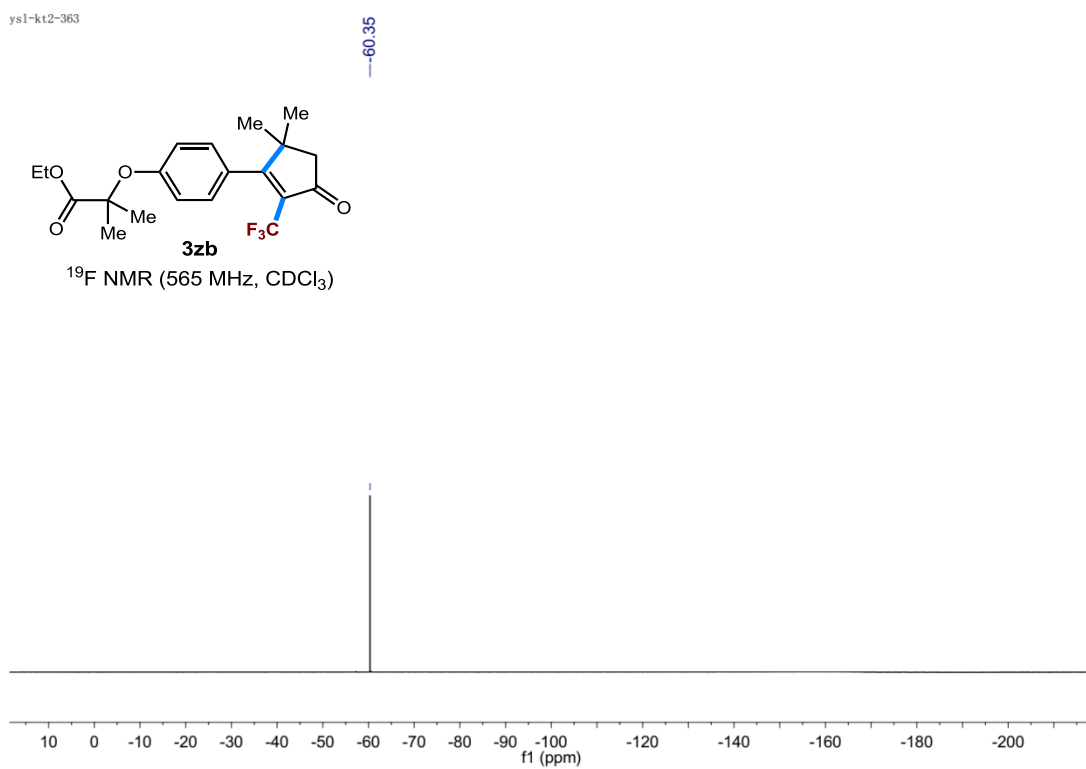

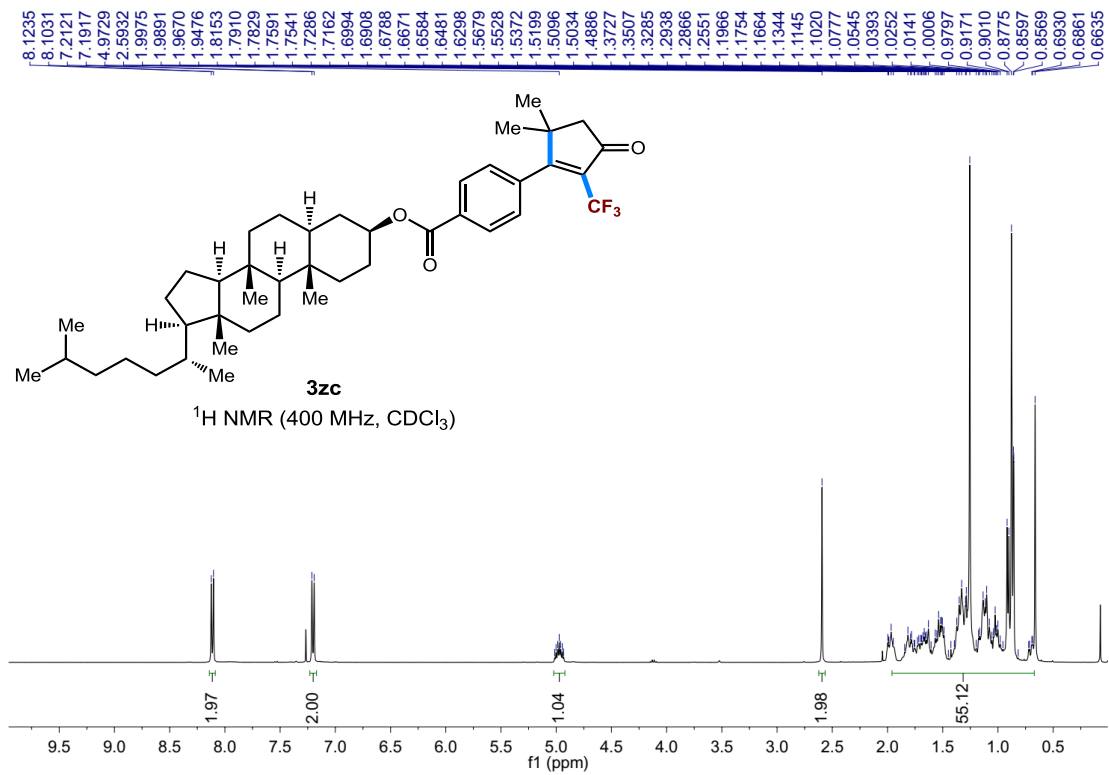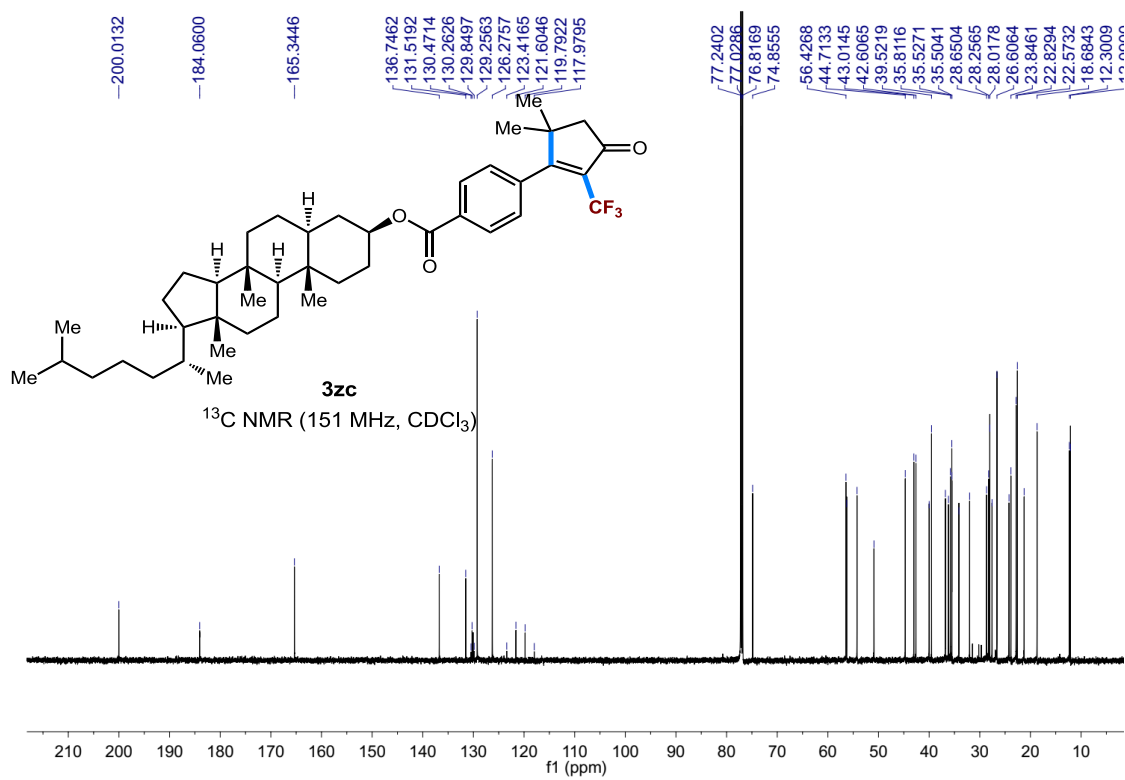

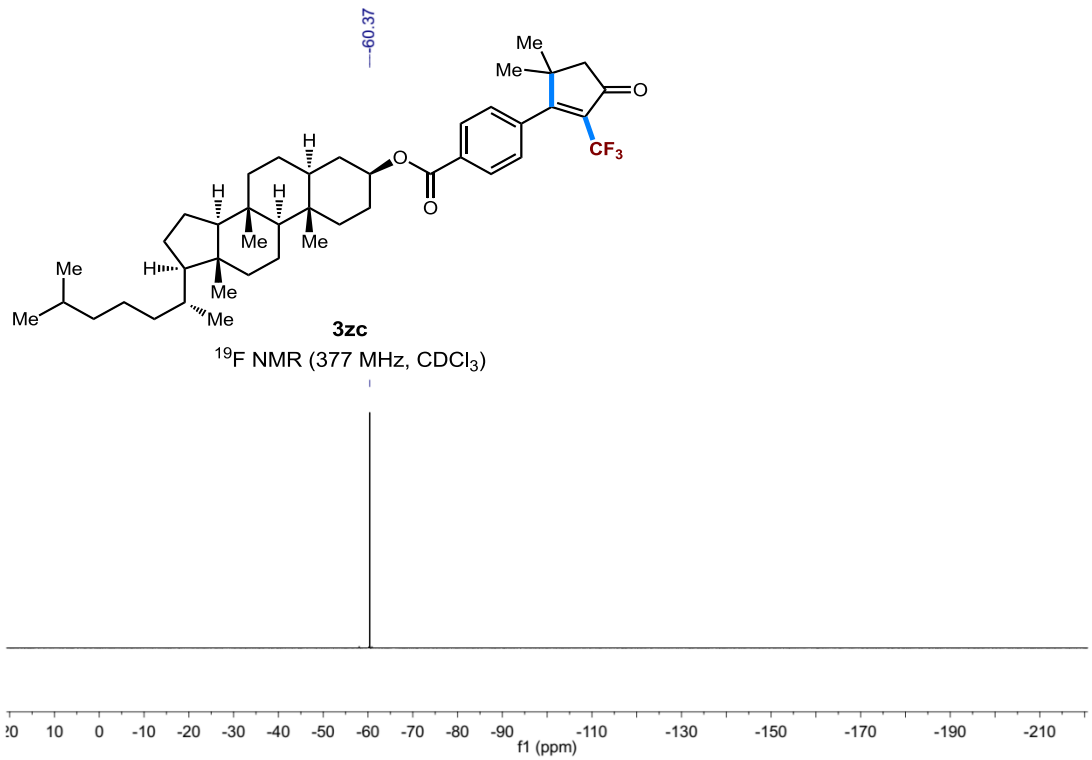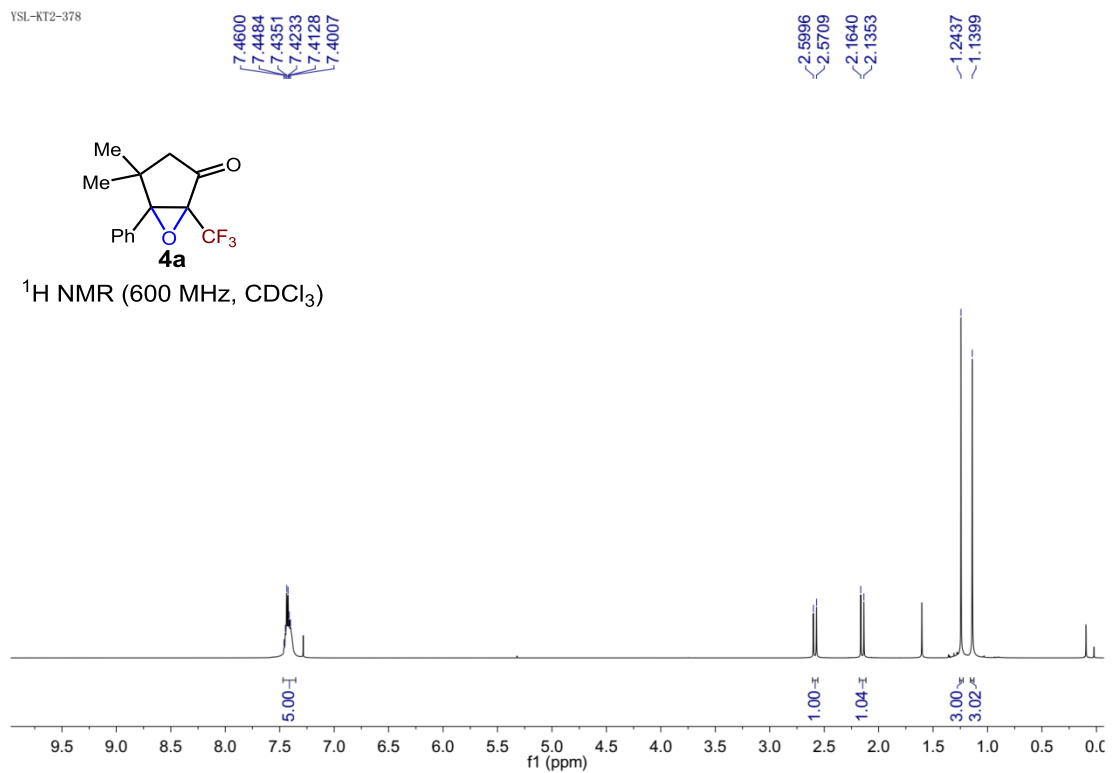

YSL-KT2-378

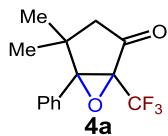

<sup>13</sup>C NMR (151 MHz, CDCl<sub>3</sub>)

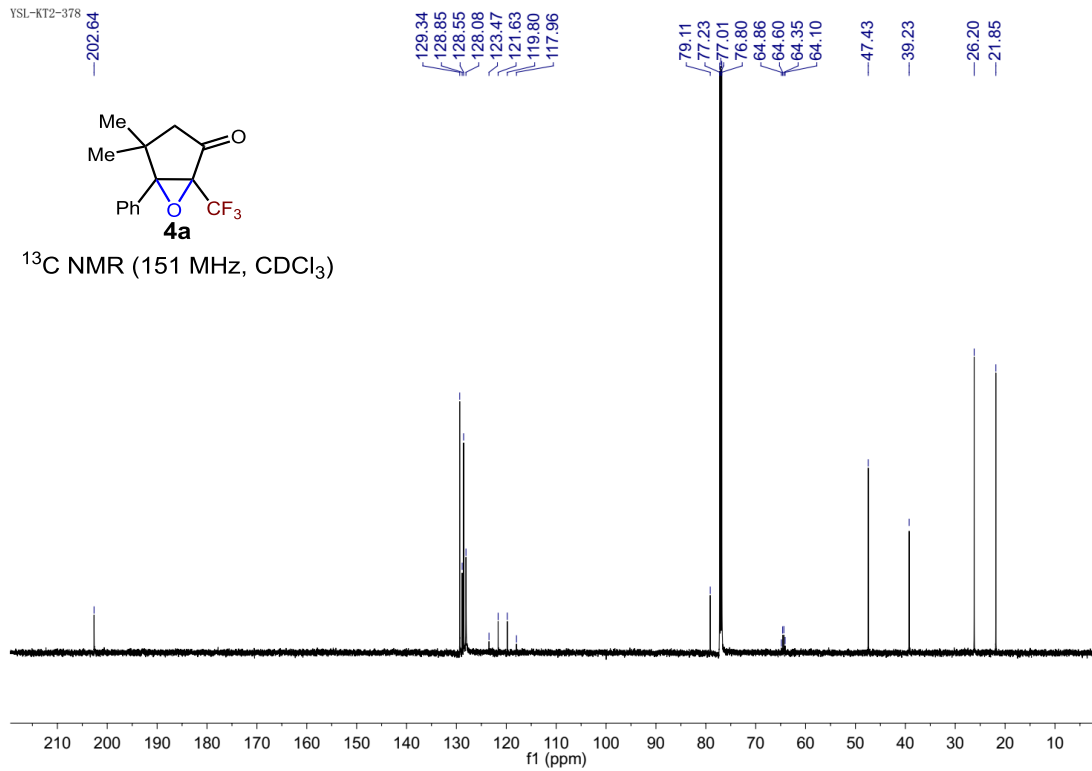

YSL-KT2-378

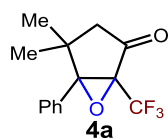

<sup>19</sup>F NMR (565 MHz, CDCl<sub>3</sub>)

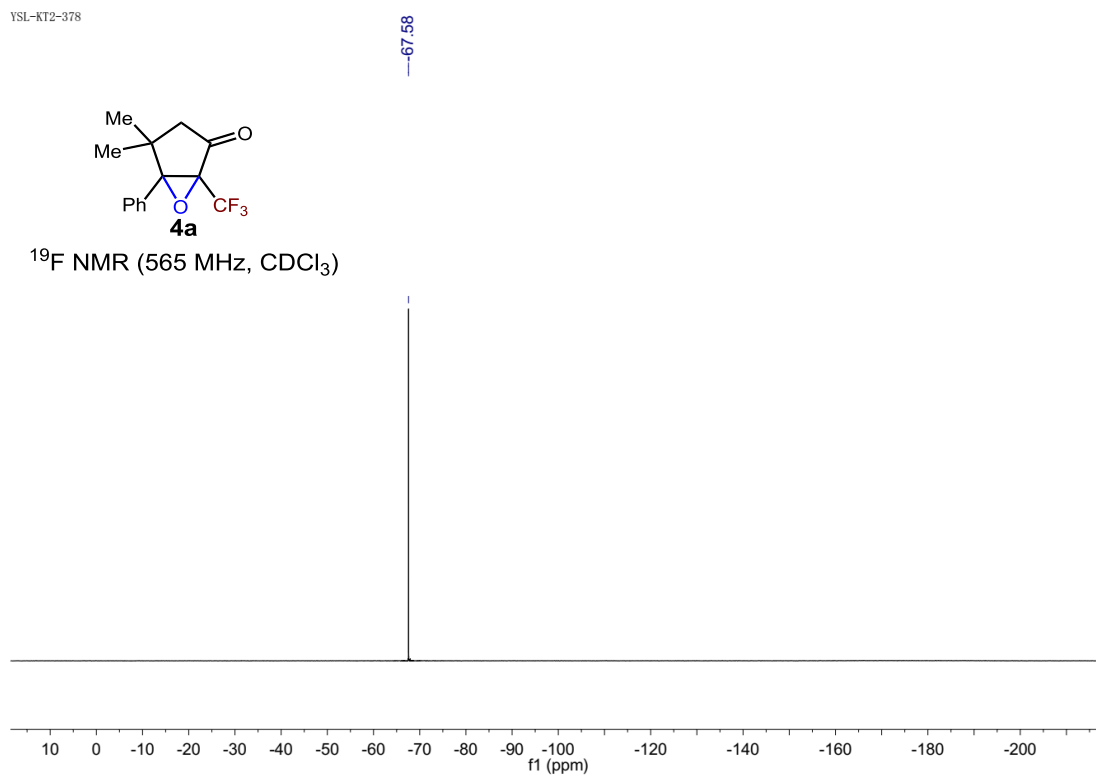

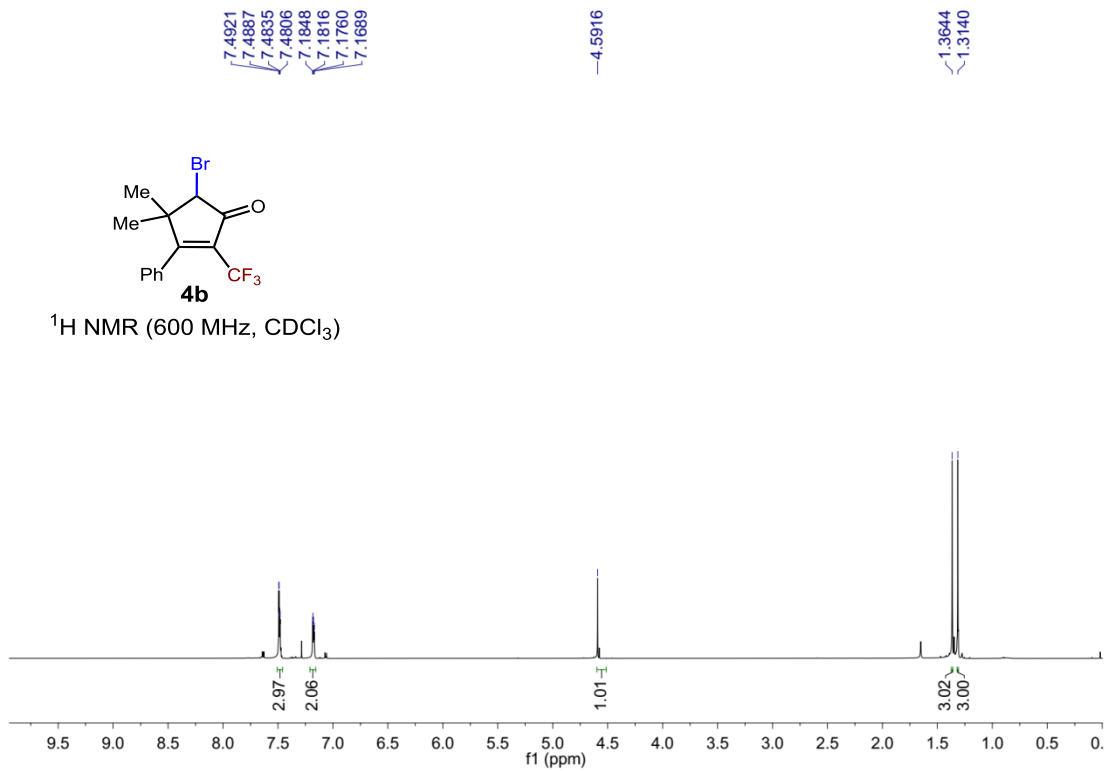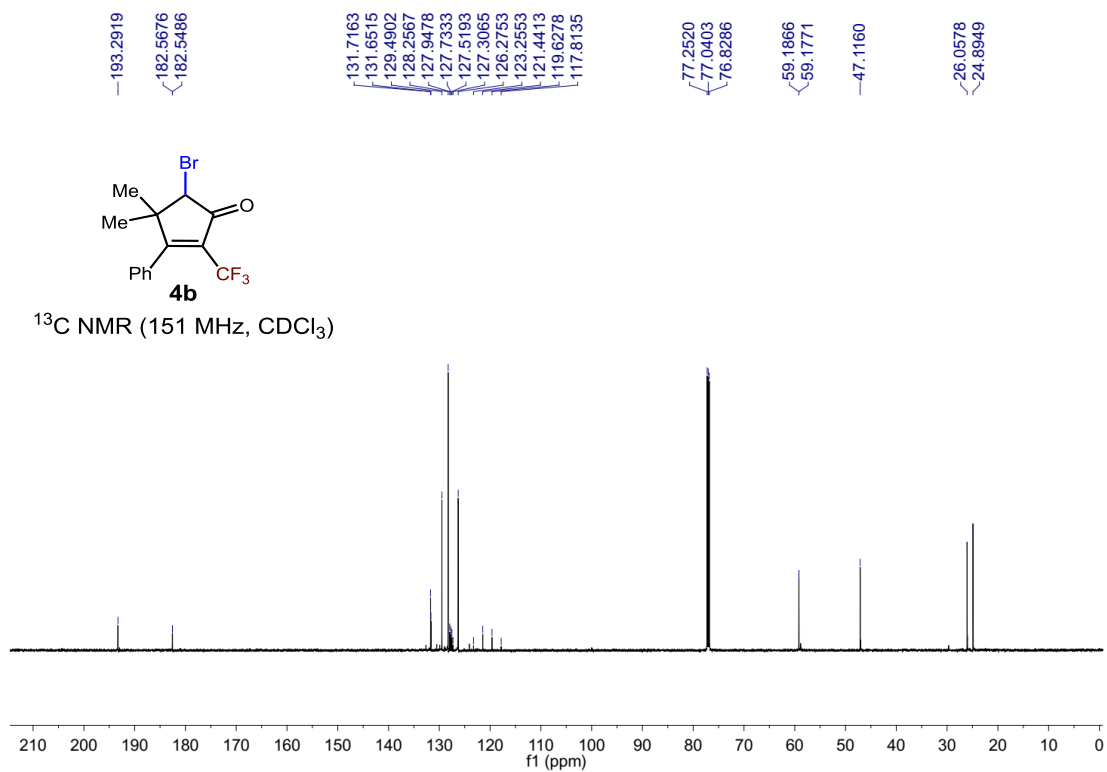

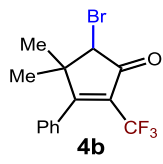

$^{19}\text{F}$  NMR (565 MHz,  $\text{CDCl}_3$ )

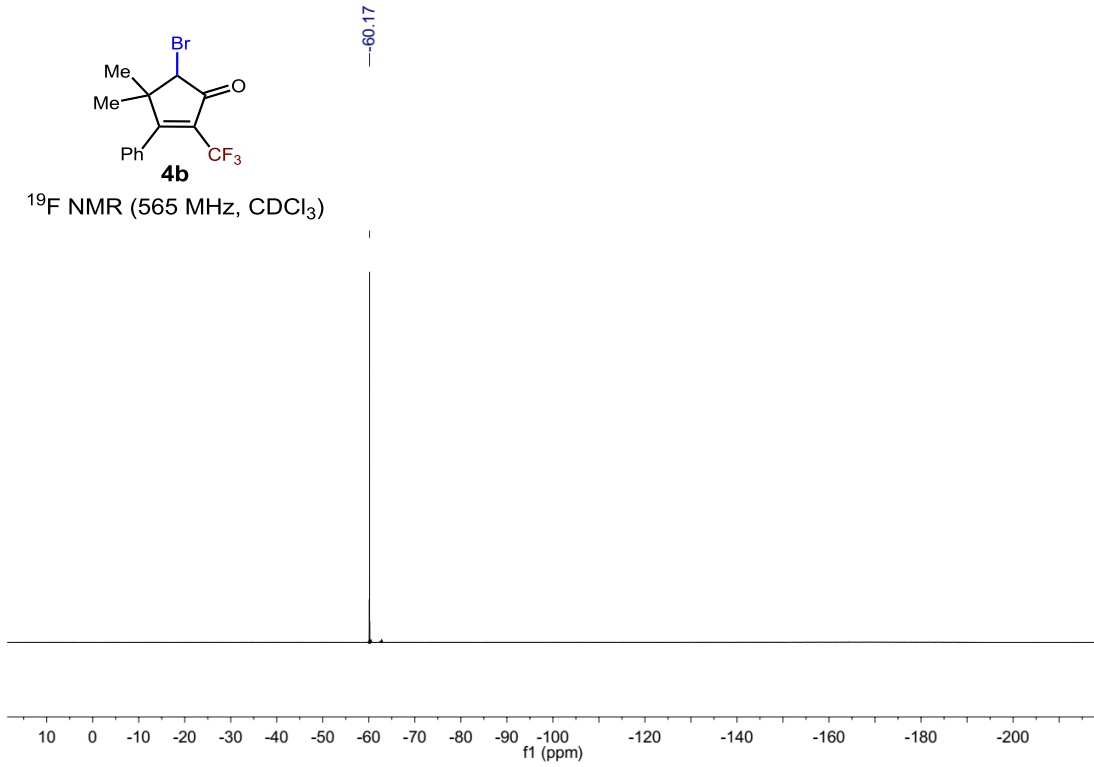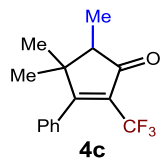

$^1\text{H}$  NMR (600 MHz,  $\text{CDCl}_3$ )

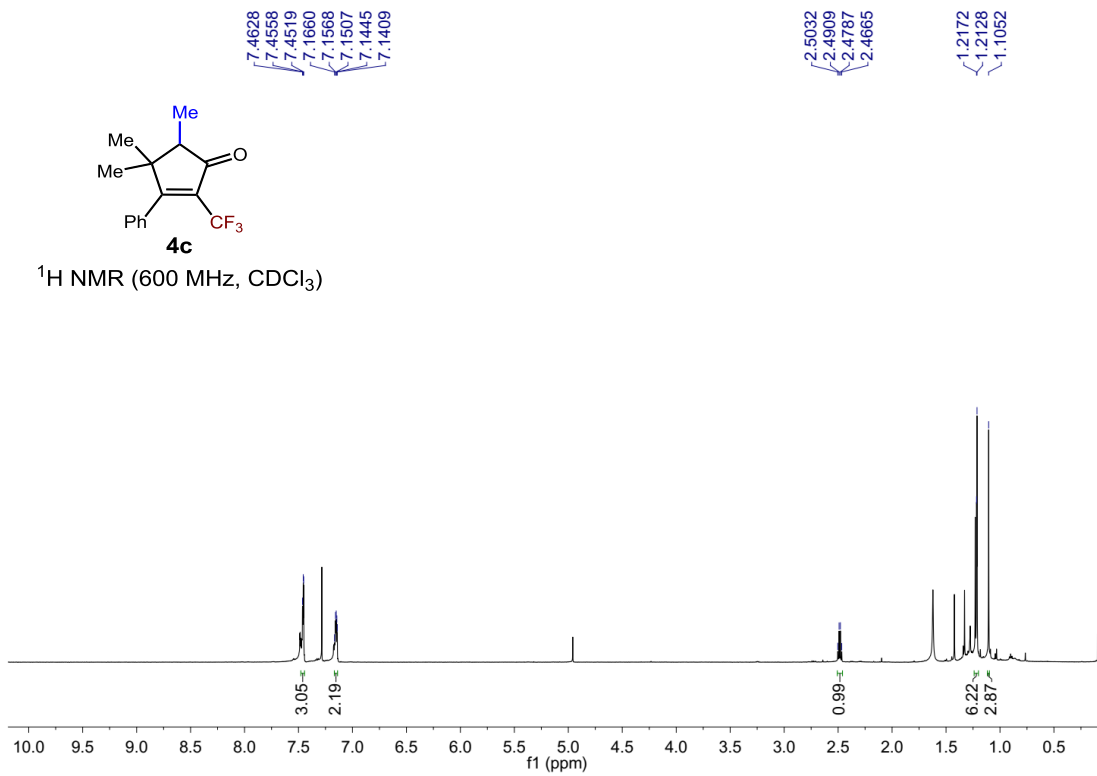

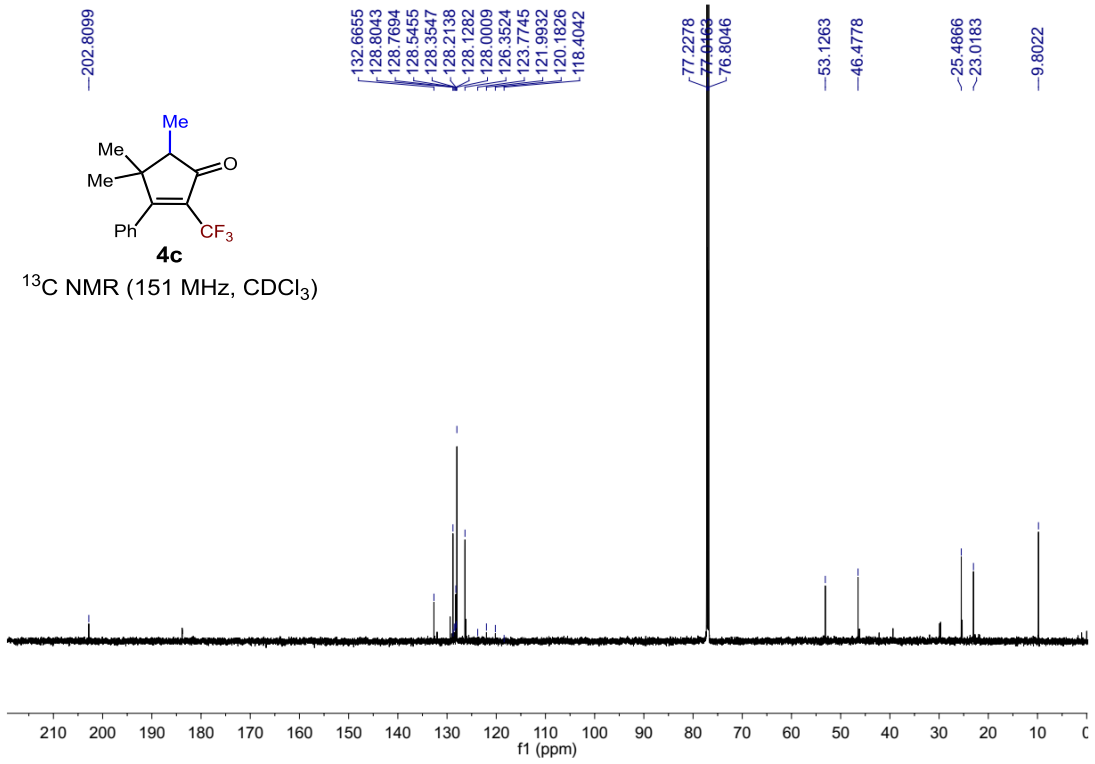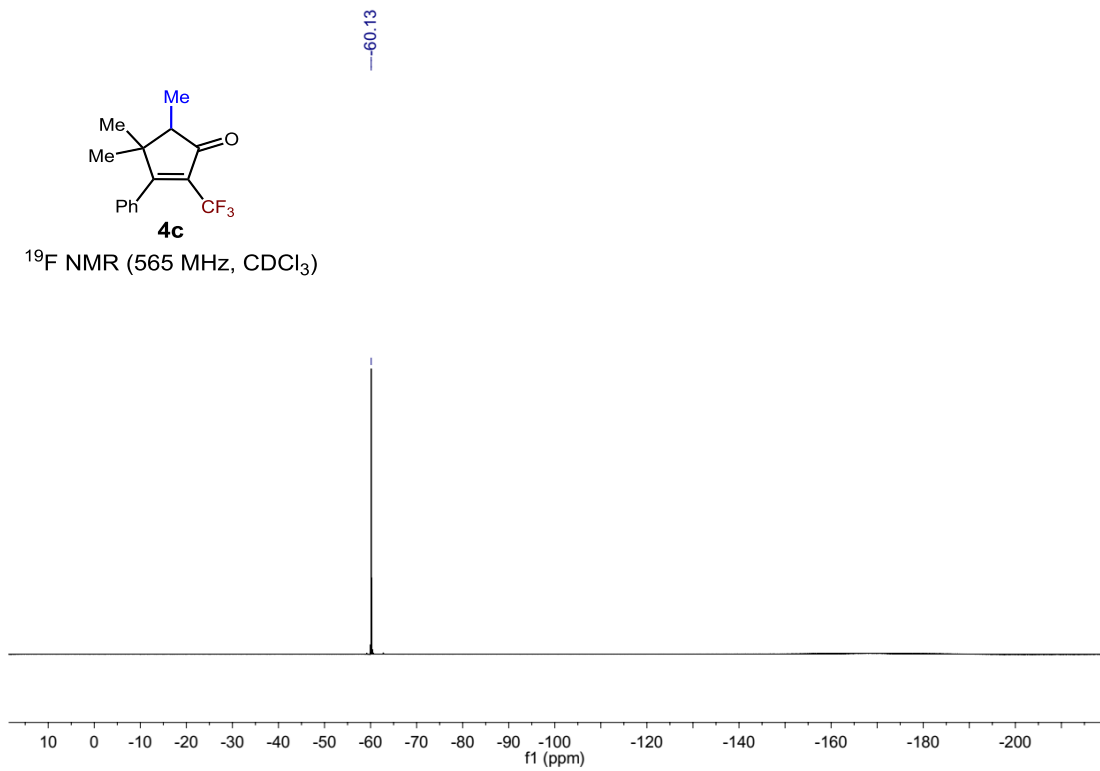

YSL-KT2-Y-128

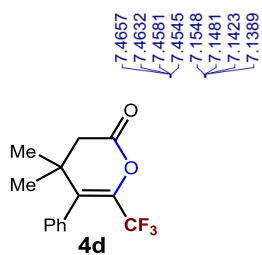

$^1\text{H}$  NMR (600 MHz,  $\text{CDCl}_3$ )

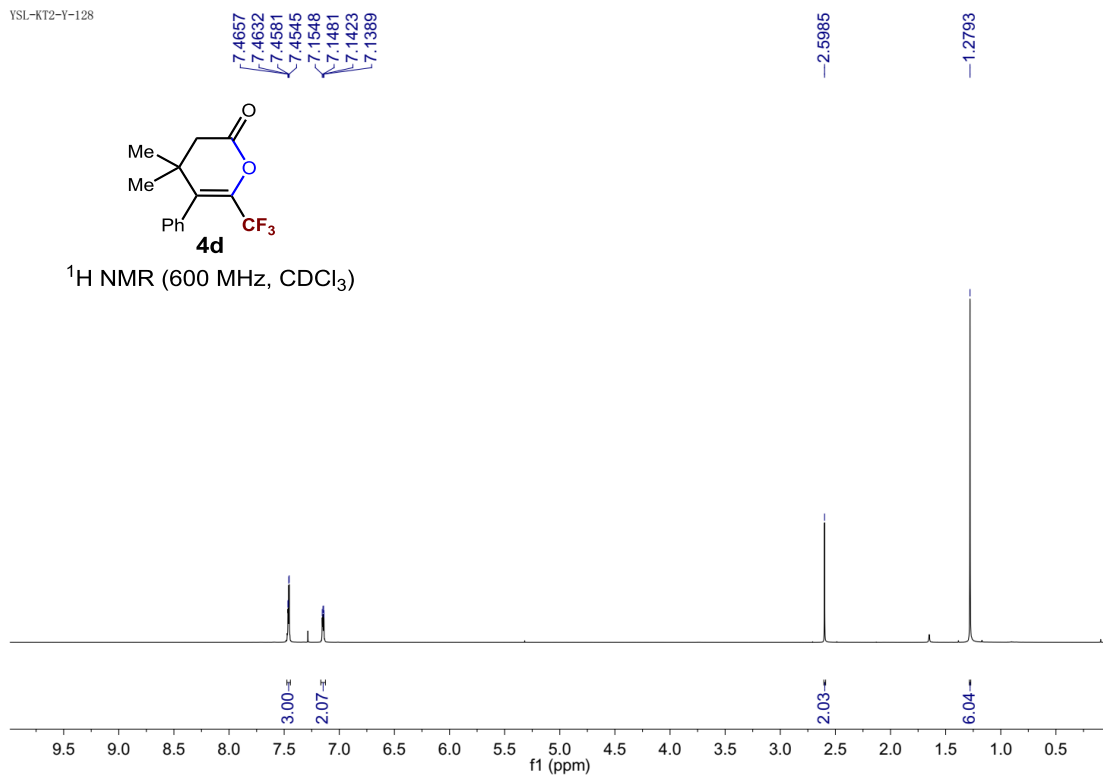

YSL-KT2-Y-128

200.5800  
185.5044

132.4372  
130.1164  
129.9093  
129.7057  
129.5011  
128.8838  
128.0540  
126.1629  
123.6100  
121.7979  
119.9853  
118.1718

77.2431  
77.0315  
76.8196

50.9955  
43.0157

26.6462

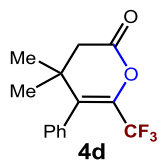

$^{13}\text{C}$  NMR (151 MHz,  $\text{CDCl}_3$ )

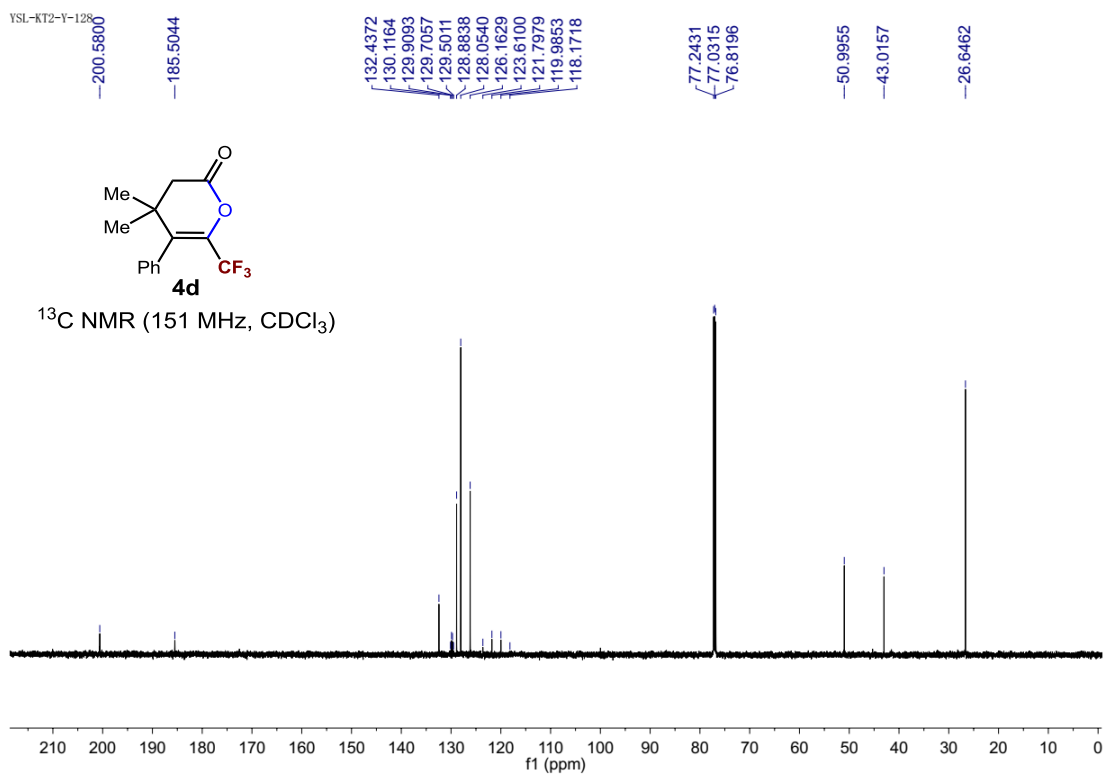



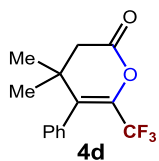

$^{19}\text{F}$  NMR (565 MHz,  $\text{CDCl}_3$ )

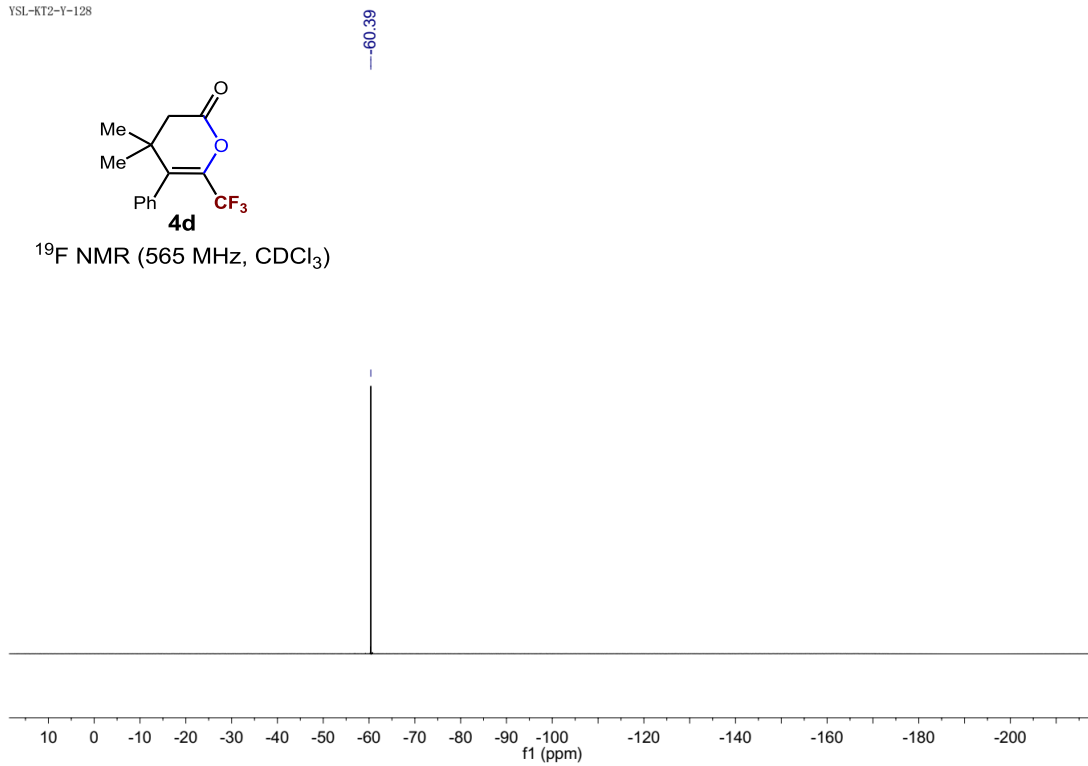

7.4260  
7.4136  
7.4021  
7.3995  
7.3896  
7.3768  
7.3731  
7.3648  
7.3579  
7.3523  
7.3390  
7.3367  
7.3347  
7.3289  
7.3249  
7.3200  
7.3151  
7.3128  
7.3057  
-6.3048

-1.2157

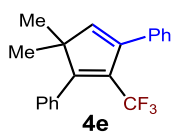

$^1\text{H}$  NMR (600 MHz,  $\text{CDCl}_3$ )

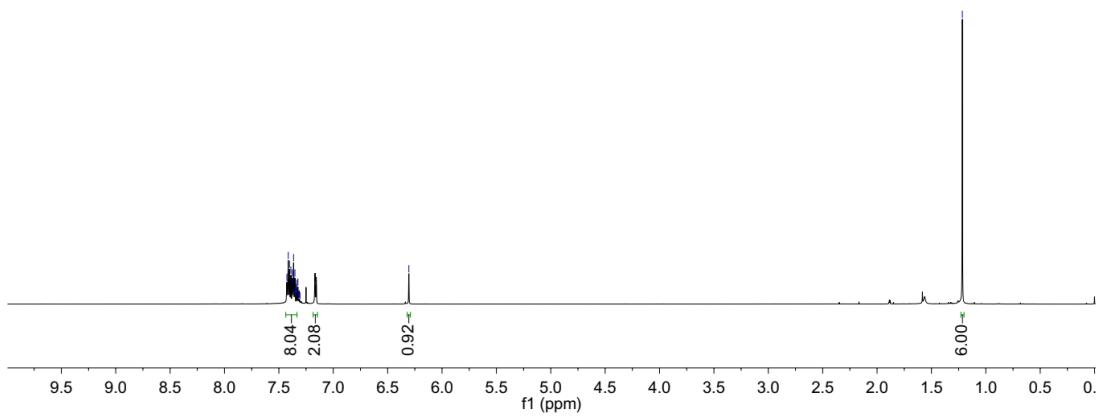

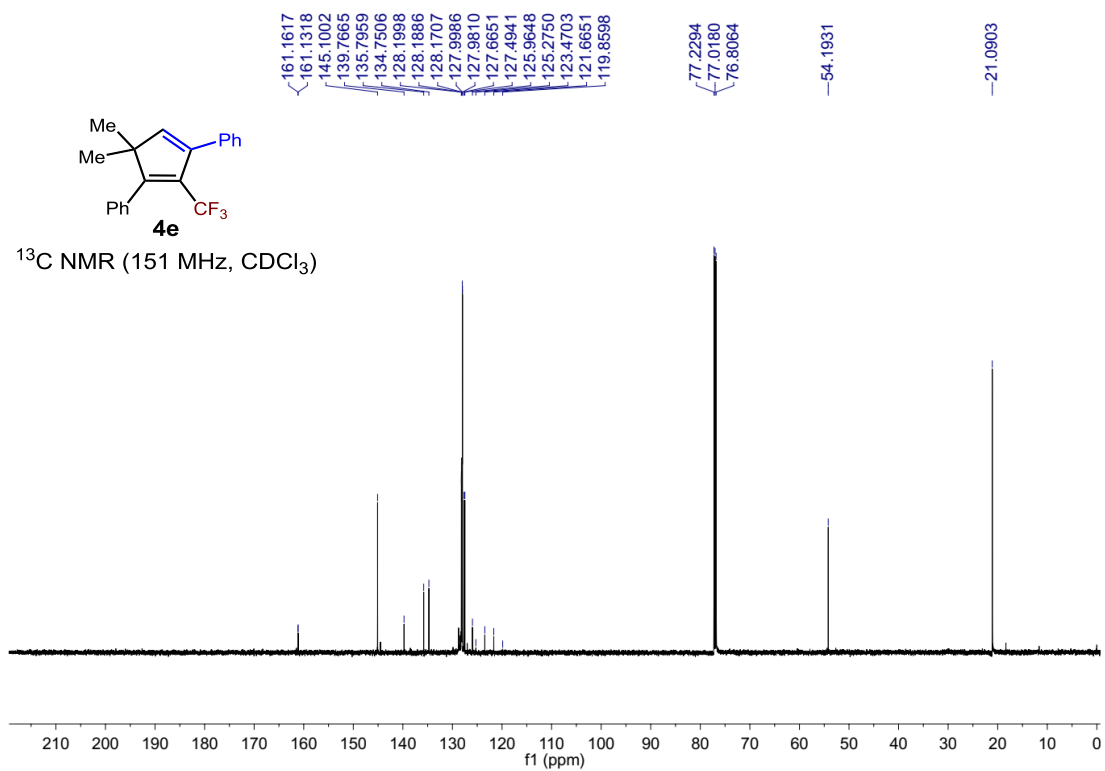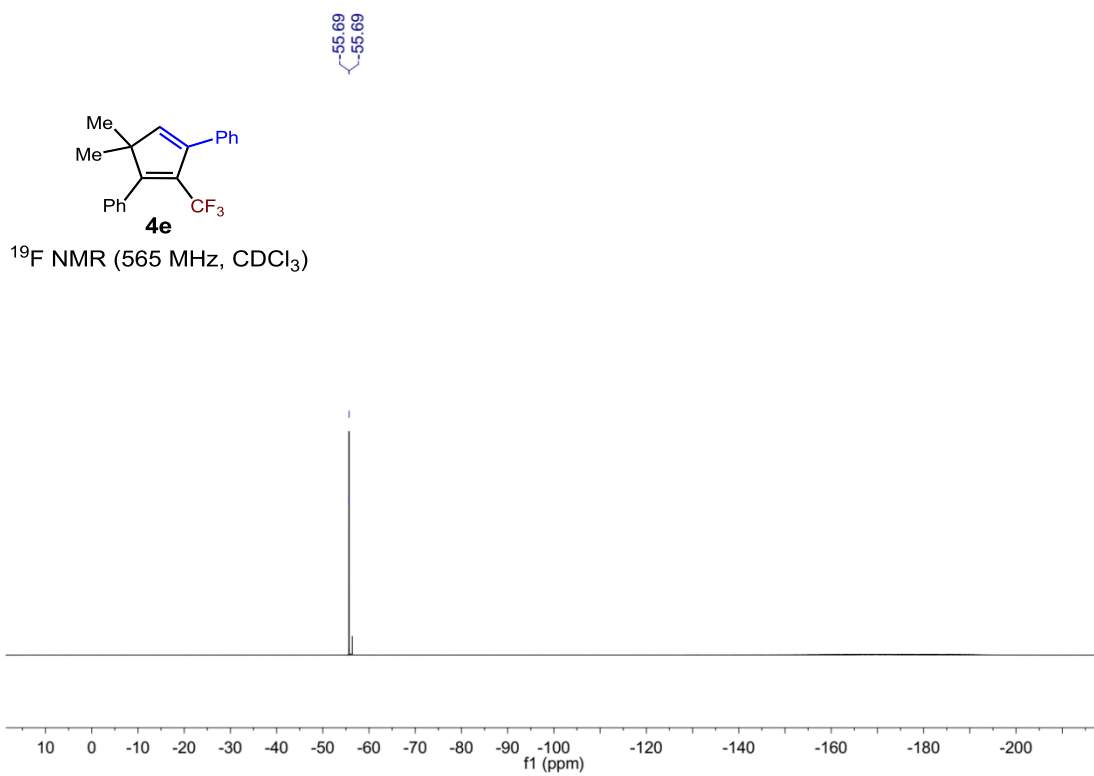

YSL-D-3

7.5812  
7.5725  
7.5695  
7.5671  
7.4709  
7.4689  
7.4668  
7.4597  
7.4564  
7.4532  
7.4460  
7.4439  
7.4418  
7.3994  
7.3865  
7.3766  
7.3742

2.5549  
2.5435  
2.5326  
2.5213  
2.3712  
2.3600  
2.3487  
2.3373  
2.3260  
2.3146  
2.3033  
1.0188  
1.0057

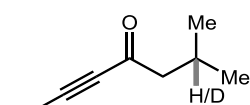

[D]-1a (75% D)  
<sup>1</sup>H NMR (600 MHz, CDCl<sub>3</sub>)

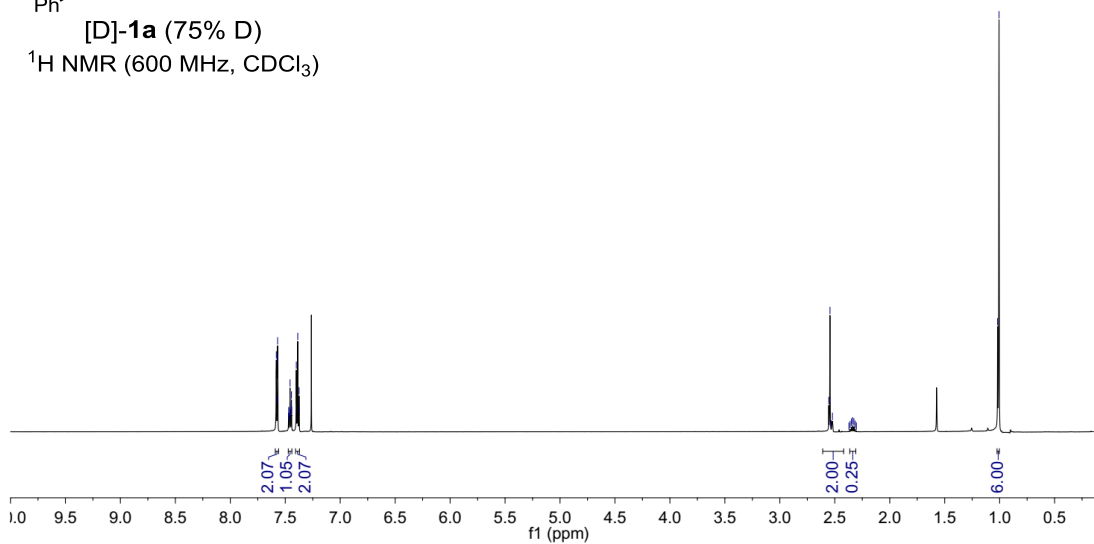

YSL-D-3

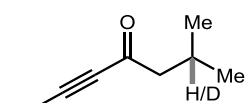

[D]-1a (75% D)  
<sup>13</sup>C NMR (151 MHz, CDCl<sub>3</sub>)

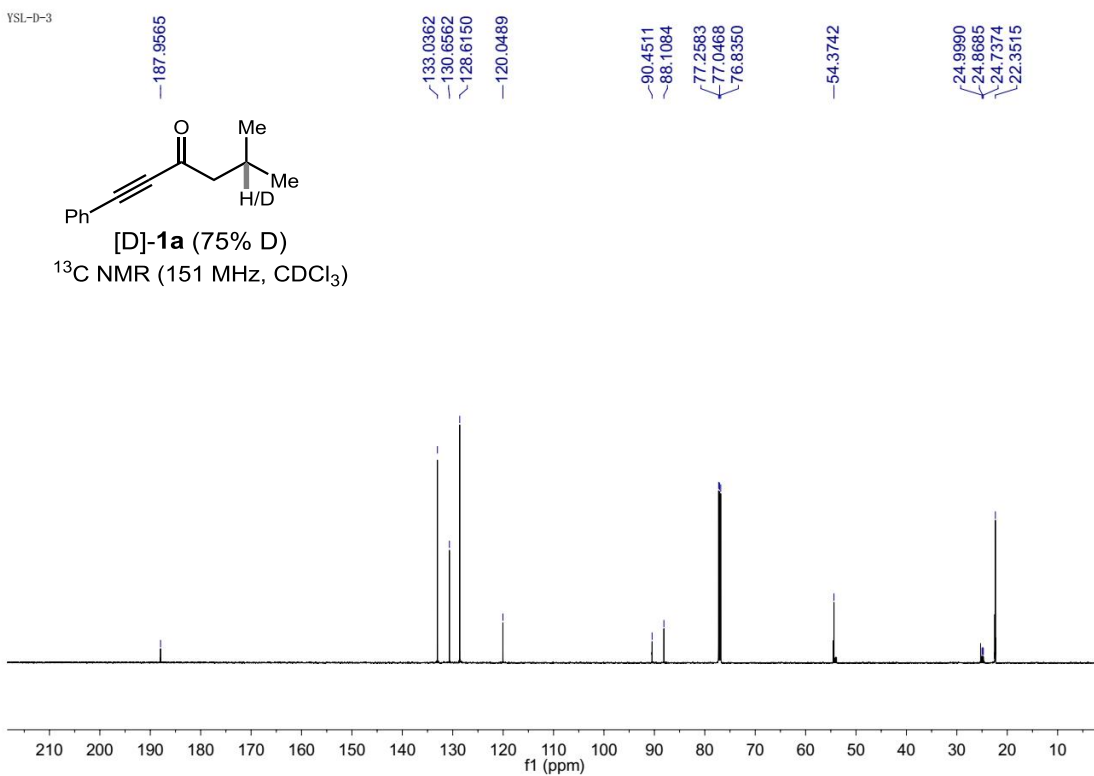

## 6. X-Ray crystallographic data

The crystal of **3b** was recrystallized in acetone/petroleum ethers via slow evaporation at room temperature. Crystal data for **3b** (C<sub>15</sub>H<sub>12</sub>F<sub>3</sub>NO, 279.26): monoclinic, space group P2(1)/c,  $a = 12.1015(19)$  Å,  $b = 9.7752(13)$  Å,  $c = 22.586(4)$  Å,  $\beta = 92.403(4)$ ,  $U = 2669.5(7)$  Å<sup>3</sup>,  $Z = 8$ ,  $T = 297(2)$  K, absorption coefficient 0.116 mm<sup>-1</sup>, reflections collected 6094, independent reflections 4325 [ $R(\text{int}) = 0.0250$ ], refinement by full-matrix least-squares on  $F^2$ , data/restraints/parameters 4325/0/381, goodness-of-fit on  $F^2 = 1.029$ , final  $R$  indices [ $I > 2s(I)$ ]  $R_1 = 0.0559$ ,  $wR_2 = 0.1863$ , largest diff peak and hole 0.309 and -0.463 e.Å<sup>-3</sup>. Crystallographic data for the structure **3b** have been deposited with the Cambridge Crystallographic Data Centre as supplementary publication no. CCDC 2114640.

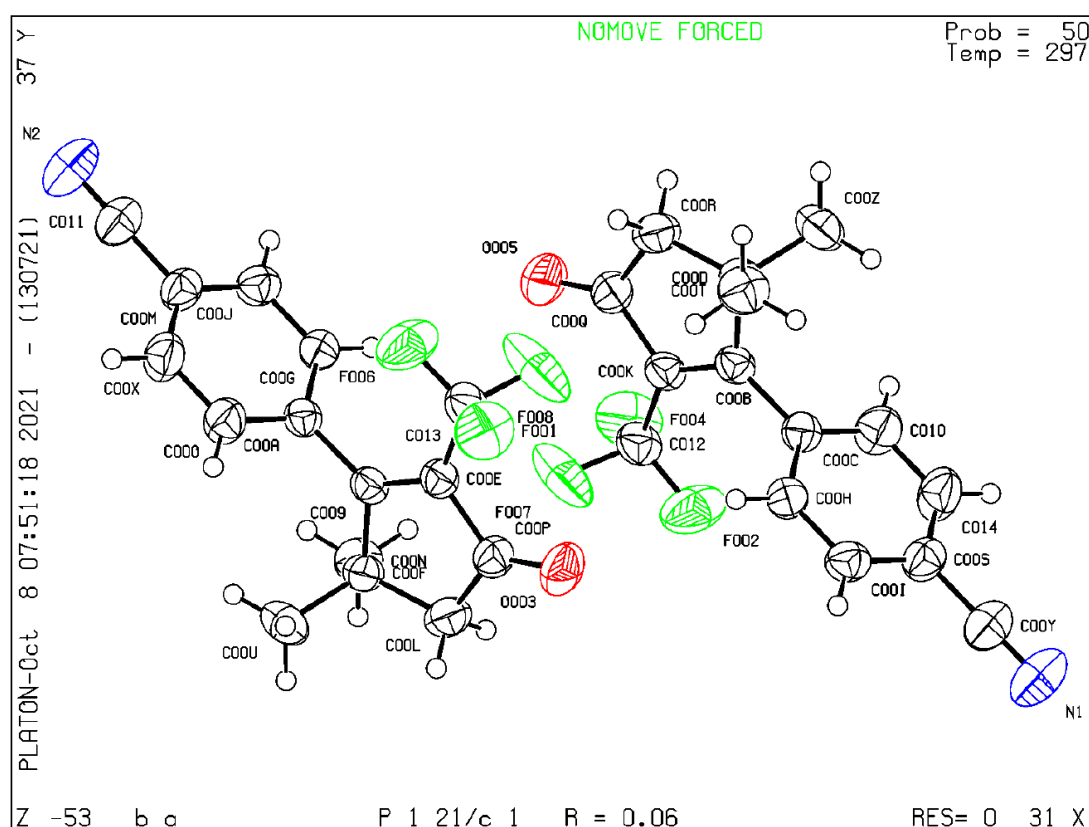

**Figure S2.** X-Ray crystal structure of **3b** with the ellipsoid contour at 50% probability levels
